# Supplementary material
Source: PubMed Central journal article supplement (PMC7294439)
Supplement: NIHMS1590003-supplement-Supplementary_Information.pdf [file NIHMS1590003-supplement-Supplementary_Information.pdf]

## Supporting Information

# Water-compatible Cycloadditions of Oligonucleotide-conjugated Strained Allenes for DNA-encoded Library Synthesis

Matthias V. Westphal,<sup>†,§</sup> Liam Hudson,<sup>†,§</sup> Jeremy W. Mason,<sup>†,§</sup> Johan A. Pradeilles,<sup>†,§</sup> Frédéric J. Zécri,<sup>\*,§</sup> Karin Briner,<sup>\*,§</sup> Stuart L. Schreiber<sup>\*,†,||</sup>

<sup>†</sup> Chemical Biology and Therapeutics Science Program, Broad Institute  
415 Main Street, Cambridge, MA 02142, USA

<sup>§</sup> Novartis Institutes for BioMedical Research  
181 Massachusetts Avenue, Cambridge, MA 02139, USA

<sup>||</sup> Department of Chemistry and Chemical Biology, Harvard University  
12 Oxford Street, Cambridge, MA 02138, USA

# Contents

|    |                                                                                                                                  |    |
|----|----------------------------------------------------------------------------------------------------------------------------------|----|
| 1. | Supplementary Tables .....                                                                                                       | 3  |
| 2. | Supplementary Figures .....                                                                                                      | 7  |
| 3. | General Information .....                                                                                                        | 16 |
| a. | Nuclear magnetic resonance (NMR) spectroscopy.....                                                                               | 16 |
| b. | Reaction monitoring by ultra-performance liquid chromatography-mass spectrometry (UPLC-MS) .....                                 | 16 |
| c. | Ion-pair chromatographic analysis of DNA-conjugates by ultra-performance liquid chromatography-mass spectrometry (UPLC-MS) ..... | 17 |
| d. | Preparative high performance liquid chromatography (prep-HPLC) .....                                                             | 17 |
| e. | Preparative high performance liquid chromatography of oligonucleotide-conjugates (microprep-HPLC) .....                          | 18 |
| f. | Other methods and equipment .....                                                                                                | 18 |
| g. | Flash chromatography .....                                                                                                       | 18 |
| 4. | Chemical synthesis.....                                                                                                          | 19 |
| a. | General remarks .....                                                                                                            | 19 |
|    | Chemical structure of DNA-HP .....                                                                                               | 19 |
|    | Chemical structure of AOP-HP .....                                                                                               | 19 |
| b. | General procedures .....                                                                                                         | 20 |
|    | GP1: Ethanol precipitation of 10 $\mu$ L reactions in a 96-well PCR plate .....                                                  | 20 |
|    | GP2: Ethanol precipitation of larger scale reactions .....                                                                       | 20 |
|    | GP3: on-DNA strain-promoted cycloaddition reactions (10 $\mu$ L total volume).....                                               | 20 |
| c. | Synthesis of DNA-conjugate 3 .....                                                                                               | 21 |
|    | Synthesis of FS11-1.....                                                                                                         | 21 |
|    | Synthesis of <i>rac</i> -FS11-2.....                                                                                             | 22 |
|    | Synthesis of <i>rac</i> -FS11-3.....                                                                                             | 22 |
|    | Synthesis of <i>rac</i> -2.....                                                                                                  | 23 |
|    | Synthesis of 3.....                                                                                                              | 23 |
| d. | Synthesis of DNA-conjugate 11 .....                                                                                              | 24 |
|    | Synthesis of FS12-1.....                                                                                                         | 25 |
|    | Synthesis of <i>rac</i> -FS12-2.....                                                                                             | 25 |
|    | Synthesis of <i>rac</i> -FS12-3.....                                                                                             | 26 |
|    | Synthesis of <i>rac</i> -FS12-4.....                                                                                             | 26 |
|    | Synthesis of <i>rac</i> -FS12-5.....                                                                                             | 27 |
|    | Synthesis of 11.....                                                                                                             | 27 |
| e. | Synthesis of 1,3-dipoles .....                                                                                                   | 28 |
|    | Synthesis of <i>N</i> -methyl-1-(1-methyl-1H-imidazol-2-yl)methanimine oxide .....                                               | 28 |
|    | Synthesis of 5-oxo-2-(pyridazin-4-ylmethylene)pyrazolidin-2-ium-1-ide .....                                                      | 29 |
|    | Synthesis of <i>N</i> -cyclohexyl-2-ethylbutan-1-imine oxide .....                                                               | 29 |
|    | Synthesis of <i>N</i> -cyclohexyl-1-(pyridin-2-yl)methanimine oxide .....                                                        | 30 |
|    | Synthesis of <i>N</i> -cyclohexyl-1-(thiazol-2-yl)ethan-1-imine oxide .....                                                      | 30 |
| f. | Two-step diversification of 11.....                                                                                              | 31 |
| g. | Preliminary results towards a pilot library .....                                                                                | 32 |
|    | On-DNA cycloaddition reactions .....                                                                                             | 35 |
|    | Validation of <i>N</i> -capping reactions.....                                                                                   | 38 |
| 5. | Analytics of DNA-conjugates.....                                                                                                 | 42 |
| 6. | $^1\text{H}$ and $^{13}\text{C}$ NMR spectra.....                                                                                | 59 |

# 1. Supplementary Tables

**Table S1.** Formation and trapping of a DNA-conjugated strained allenes.<sup>[a]</sup>

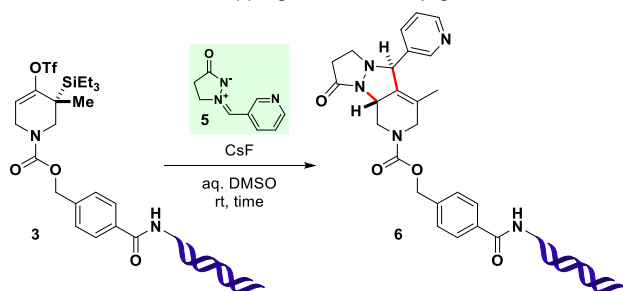

| #  | 5 [mM] | CsF [mM] | %DMSO | t [h] | 3 [%] | 6 [%] |
|----|--------|----------|-------|-------|-------|-------|
| 1  | 100    | 8000     | 50    | 1     | 0     | 100   |
| 2  | 100    | 4000     | 50    | 1     | 0     | 100   |
| 3  | 100    | 2000     | 50    | 1     | 0     | 100   |
| 4  | 100    | 1000     | 50    | 1     | 2     | 98    |
| 5  | 100    | 500      | 50    | 1     | 28    | 72    |
| 6  | 100    | 250      | 50    | 1     | 64    | 40    |
| 7  | 100    | 3000     | 75    | 1     | 0     | 100   |
| 8  | 100    | 1500     | 75    | 1     | 0     | 100   |
| 9  | 100    | 750      | 75    | 1     | 1     | 99    |
| 10 | 100    | 375      | 75    | 1     | 28    | 72    |
| 11 | 100    | ~95      | 75    | 1     | 32    | 68    |
| 12 | 7.5    | 100      | 90    | 1     | 0     | 100   |
| 13 | 7.5    | 50       | 90    | 1     | 0     | 100   |
| 14 | 7.5    | 25       | 90    | 1     | 0     | 100   |
| 15 | 7.5    | ~13      | 90    | 1     | 0     | 100   |
| 16 | 7.5    | ~6       | 90    | 1     | 0     | 100   |
| 17 | 7.5    | ~3       | 90    | 1     | 27    | 73    |
| 18 | 7.5    | ~1.5     | 90    | 1     | 67    | 33    |
| 19 | 7.5    | ~0.8     | 90    | 1     | 96    | 4     |
| 20 | 8      | 50       | 90    | 12    | 0     | 100   |
| 21 | 4      | 50       | 90    | 12    | 0     | 100   |
| 22 | 2      | 50       | 90    | 12    | 0     | 100   |
| 23 | 1      | 50       | 90    | 12    | 0     | 95    |
| 24 | 0.5    | 50       | 90    | 12    | 0     | 84    |
| 25 | 0.25   | 50       | 90    | 12    | 0     | 56    |
| 26 | 0      | 50       | 90    | 12    | 0     | 0     |
| 27 | 15     | 50       | 25    | 24    | 100   | 0     |
| 28 | 15     | 50       | 50    | 24    | 97    | 3     |
| 29 | 15     | 50       | 75    | 24    | 0     | 100   |

[a] Reactions were run at room temperature (0.5 nmol scale, 10  $\mu$ L total volume) and analyzed by UPLC-MS after ethanol precipitation. Product display (%AUC) was determined by UV (260 nm) considering DNA-species only. The relative configuration of the two newly formed stereogenic centers in **6** indicates the expected major product as observed in off-DNA precedence.

**Table S2.** Solvent screen for on-DNA strain-promoted cycloaddition reactions.<sup>[a]</sup>
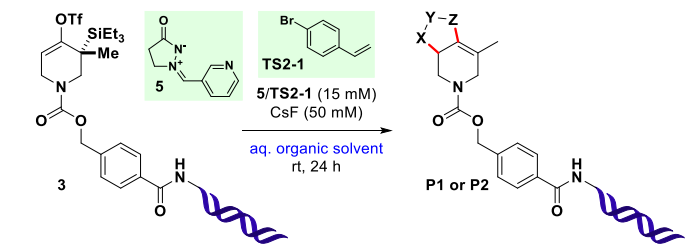

| BB       | azomethine imine (5) |    |     |    |     |     | 4-bromostyrene (TS2-1) |    |     |    |     |    |
|----------|----------------------|----|-----|----|-----|-----|------------------------|----|-----|----|-----|----|
|          | 25                   |    | 50  |    | 75  |     | 25                     |    | 50  |    | 75  |    |
| %organic |                      |    |     |    |     |     |                        |    |     |    |     |    |
| species  | 3                    | P1 | 3   | P1 | 3   | P1  | 3                      | P2 | 3   | P2 | 3   | P2 |
| DMF      | 100                  | 0  | 97  | 3  | 0   | 100 | 100                    | 0  | 100 | 0  | 0   | 70 |
| THF      | 100                  | 0  | 100 | 0  | 100 | 0   | 100                    | 0  | 100 | 0  | 97  | 3  |
| MeCN     | 100                  | 0  | 100 | 0  | 100 | 0   | 100                    | 0  | 100 | 0  | 100 | 0  |
| DMSO     | 100                  | 0  | 97  | 3  | 0   | 100 | 100                    | 0  | 100 | 0  | 0   | 89 |

[a] Reactions were run at room temperature (0.25 nmol scale, 10  $\mu$ L total volume) for 24 h and analyzed by UPLC-MS after ethanol precipitation. %AUC of residual **3** or expected product **P** was determined by integration of UV signal (260 nm) considering DNA-species only. The results might be explained by the relatively high volatility of THF and MeCN: given the small reaction volume (10  $\mu$ L), evaporation of organic solvent would quickly result in a highly aqueous medium slowing the consumption of **3** (also see **Table S1**).

**Table S3.** Effect of excess aldehyde, triethylamine and hydrochloride salts on the conversion of **3**.<sup>[a]</sup>
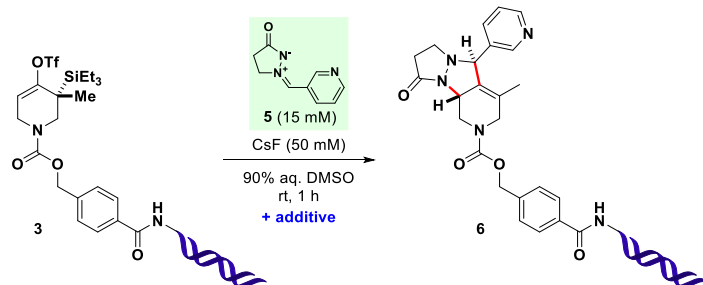

| #  | additive/deviation                   | 3 [%] | 6 [%] | comment                                                   |
|----|--------------------------------------|-------|-------|-----------------------------------------------------------|
| 1  | none                                 | 0     | 100   | efficient product formation                               |
| 2  | no <b>5</b>                          | 0     | 0     | several species form, masses inconclusive                 |
| 3  | benzaldehyde (28 mM)                 | 0     | 100   | no effect on desired transformation                       |
| 4  | benzaldehyde (112 mM)                | 0     | 100   | no effect on desired transformation                       |
| 5  | NEt <sub>3</sub> (28 mM)             | 0     | 100   | no effect on desired transformation                       |
| 6  | NEt <sub>3</sub> (112 mM)            | 0     | 100   | no effect on desired transformation                       |
| 7  | MeNHOH·HCl (28 mM)                   | 61    | 39    | clean reaction profile, incomplete conversion of <b>3</b> |
| 8  | MeNHOH·HCl (112 mM)                  | 100   | 0     | no conversion of <b>3</b>                                 |
| 9  | MeNHOH·HNEt <sub>3</sub> Cl (28 mM)  | 53    | 47    | clean reaction profile, incomplete conversion of <b>3</b> |
| 10 | MeNHOH·HNEt <sub>3</sub> Cl (112 mM) | 94    | 5     | almost no conversion of <b>3</b>                          |

[a] Reactions were run at room temperature (0.5 nmol **3**, 10  $\mu$ L total volume) and analyzed by UPLC-MS after ethanol precipitation. Display (%AUC) of residual **3** and newly formed **6** was determined by UV (260 nm) considering DNA-species only. The relative configuration of the two newly formed stereogenic centers in **6** indicates the expected major product as observed in off-DNA precedence.

**Table S4.** Effect of acidic protons on consumption of **3**: titration of 4-vinylbenzoic acid.<sup>[a]</sup>

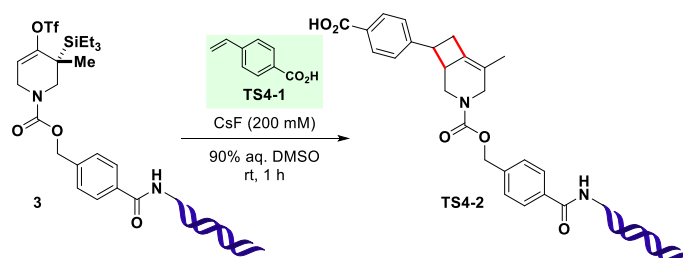

| # | TS4-1 [mM] | CsF [mM] | ratio CsF/acid | t [h] | <b>3</b> [%] | TS4-2 [%] |
|---|------------|----------|----------------|-------|--------------|-----------|
| 1 | 180        | 200      | 1.1            | 1     | 43           | 46        |
| 2 | 90         | 200      | 2.2            | 1     | 0            | 71        |
| 3 | 45         | 200      | 4.4            | 1     | 3            | 77        |
| 4 | ~23        | 200      | 8.9            | 1     | 0            | 75        |
| 5 | ~11        | 200      | 17.8           | 1     | 0            | 89        |
| 6 | ~7         | 200      | 35.6           | 1     | 0            | 90        |

[a] Reactions were run at room temperature (0.25 nmol scale, 10  $\mu$ L total volume) and analyzed by UPLC-MS after ethanol precipitation. Display (%AUC) of residual **3** ( $R_t$  = 3.3 min) and **TS4-2** ( $R_t$  = 2.5 min) were determined by UV (260 nm) considering DNA-species only.

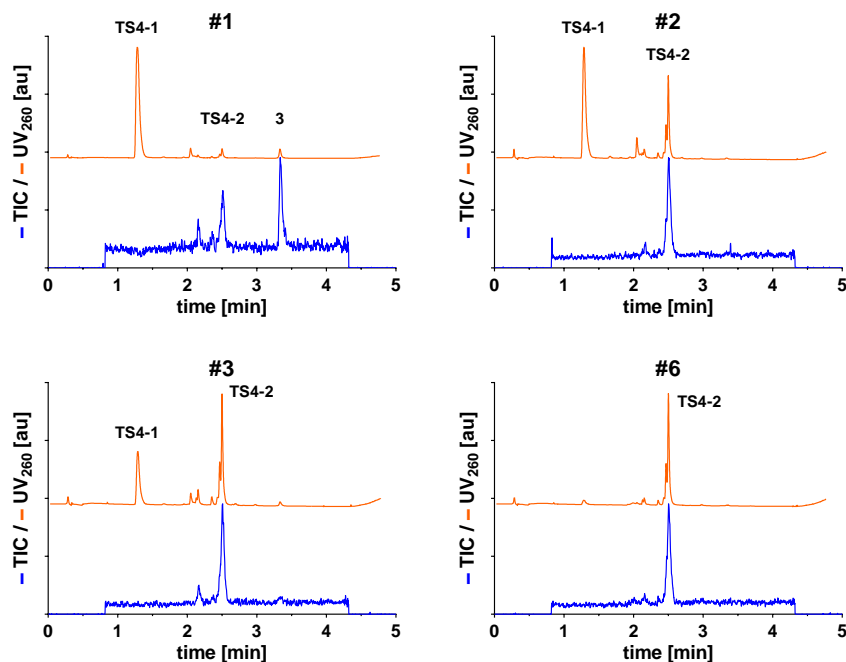

**Table S5.** Acceptor-substituted olefins in strain-promoted on-DNA [2+2] cycloadditions.<sup>[a]</sup>

| structure                                                                           | <i>E</i> in DMSO | <i>E</i> of similar compound in DMSO                                                          | time [h] | DNA alkylation observed? | comment                                                                                                                                                            |
|-------------------------------------------------------------------------------------|------------------|-----------------------------------------------------------------------------------------------|----------|--------------------------|--------------------------------------------------------------------------------------------------------------------------------------------------------------------|
| 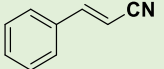   | -24.60           |                                                                                               | 5.5      | no                       | m/z agrees with expected product (up to 92% display)                                                                                                               |
| 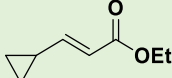   | n. a.            | 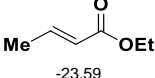<br>-23.59   | 1        | no                       | m/z agrees with expected product (up to >69% display)                                                                                                              |
| 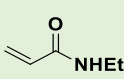   | n. a.            | 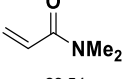<br>-23.54   | 1        | no                       | m/z agrees with expected product (up to >95% display)                                                                                                              |
| 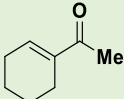   | n. a.            | < -23 (estimated)                                                                             | 1        | no                       | m/z agrees with expected product (up to 75% display)                                                                                                               |
| 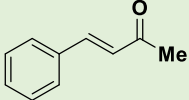   | -23.01           |                                                                                               | 5.5      | no                       | m/z agrees with expected product (up to >71% display)                                                                                                              |
| 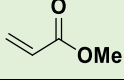   | n. a.            | 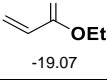<br>-19.07   | 1        | no                       | efficient product formation, no additional alkylation observed                                                                                                     |
| 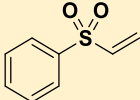  | -18.36           |                                                                                               | 1        | yes                      | product m/z agrees with [2+2] cycloaddition product and up to seven alkylation events (see Figure S4)                                                              |
| 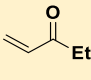 | n. a.            | 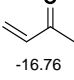<br>-16.76 | 1        | yes                      | product m/z agrees with [2+2] cycloaddition product and up to four alkylation events (concentration dependent)                                                     |
| 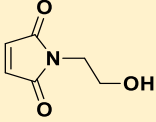 | n. a.            | 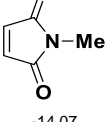<br>-14.07 | 1        | yes                      | product m/z agrees with [2+2] cycloaddition product and up to 5 alkylation events (concentration dependent)                                                        |
| 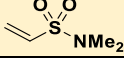 | n.a.             | n.a.                                                                                          | 2        | yes                      | product m/z agrees with [2+2] cycloaddition product and up to 2 alkylation events (single experiment)                                                              |
| 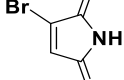 | n. a.            |                                                                                               | 1        |                          | at high building block concentration: residual starting material and a very broad peak (polymerization?). At lower concentration, no defined DNA species detected. |
| 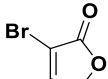 | n. a.            |                                                                                               | 1        |                          | at high building block concentration: residual starting material and a very broad peak (polymerization?). At lower concentration, no defined DNA species detected. |

<sup>[a]</sup> Mayr electrophilicity parameters *E* (in DMSO) of acceptor-substituted olefins as published<sup>[1]</sup> or estimated by similarity. Conditions of on-DNA reactions: olefin (180 mM and 2-fold dilutions (5x down to ca. 6.6 mM)), strained-alkene precursor **3** (0.25 nmol), CsF (200 mM), 90% aq. DMSO, rt, 1 or 5.5 h. Following EtOH precipitation, reaction outcomes were analyzed by UPLC-MS.

## 2. Supplementary Figures

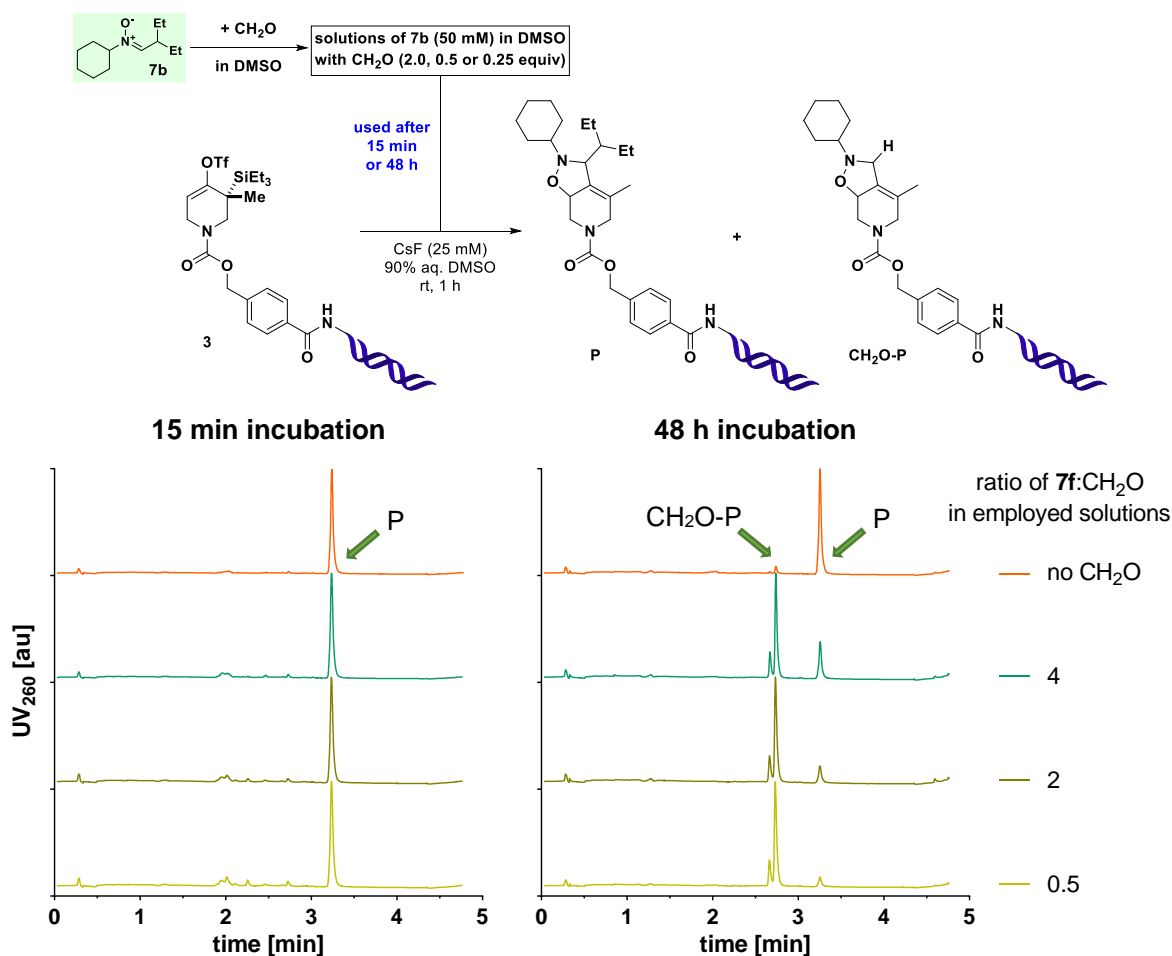

**Figure S1.** The effect of formaldehyde on strain-promoted [3+2] cycloadditions with nitron **7b**. In the experiment, a solution of nitron **7b** (100 mM in DMSO) was combined with the same volume of 37% aq. formaldehyde in DMSO (200 mM and 2-fold dilutions) to give stock solutions of varied ratios **7b**: $\text{CH}_2\text{O}$  (all 50 mM in **7b**). After 15 min and 48 h incubation at room temperature, these stock solutions were employed in on-DNA strain-promoted cycloadditions. Reactions were performed with on-DNA allene precursor **3** (0.25 nmol), stock solutions **7b** (10 mM final concentration, 20 mM for no-formaldehyde control), and cesium fluoride (25 mM final concentration) in 90% aq. DMSO (room temperature, 1 h). Following ethanol precipitation, samples were analyzed by UPLC-MS. Reactions employing **7b**-formaldehyde mixtures (aged for 15 min), did not show significant formation of formaldehyde-derived product (Note: side reactions occur due to the low concentration of nitron **7b**, see species eluting between 1.8 to 2.8 min). Employing the same stock solutions after 48 h resulted in significant formation of the corresponding formaldehyde-derived species (two peaks, presumably regioisomers). Importantly, small amounts of the same species were observed without added formaldehyde (orange top chromatogram), corroborating the presence low formaldehyde quantities in commercial DMSO.

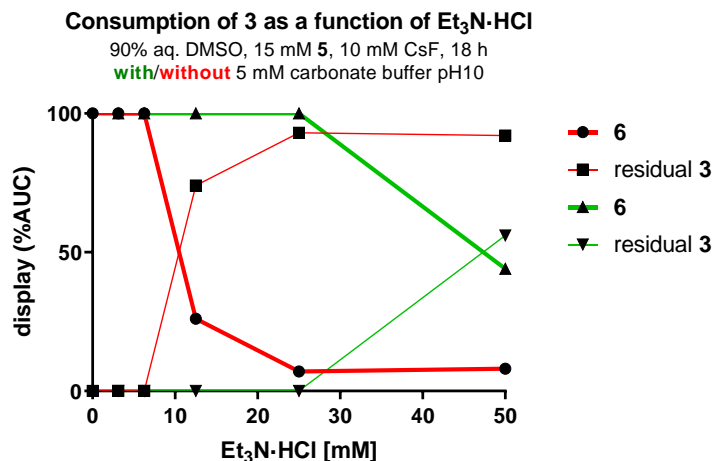

**Figure S2.** Effect of added bicarbonate buffer (pH10) on strained allene formation. on-DNA strained-allene precursor **3** (1 mM in water, 0.5  $\mu$ L, 0.5 nmol) was combined with a solution of **5** in DMSO (9  $\mu$ L, 15 mM final concentration). Solutions of CsF (200 mM) and varying concentrations of Et<sub>3</sub>N·HCl (1000 mM and two-fold dilutions) in either carbonate buffer (100 mM, pH10) or water were added (0.5  $\mu$ L to give final concentrations of 10 mM CsF, 5 or 0 mM carbonate buffer, and varied Et<sub>3</sub>N·HCl content). Reactions were vortexed, spun down and incubated at room temperature for 18 h. Following ethanol precipitation, samples were analyzed by UPLC-MS and displays (%AUC) of residual **3** and product **6** were determined by integration of UV signals (UV 260 nm) considering DNA-species only. As the data shows, addition of carbonate buffer (pH10, 5 mM final concentration) was effective to overcome fluoride sequestration by added Et<sub>3</sub>N·HCl up to a concentration of ca. 25 mM (18 h reaction time), whereas consumption of **3** dropped significantly around 10 mM Et<sub>3</sub>N·HCl in the absence of buffer.

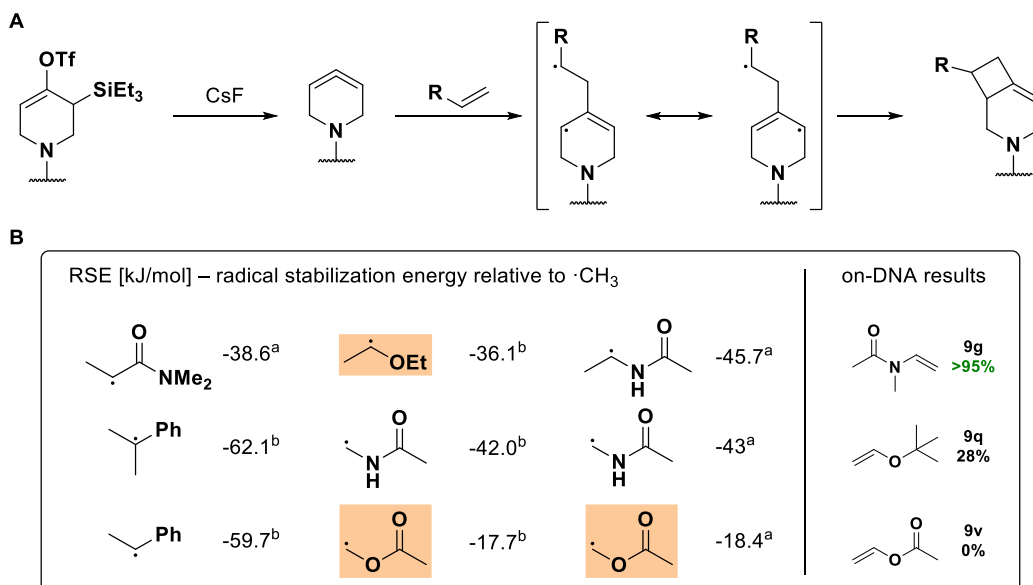

**Figure S3.** Radical stabilization energies in the context of strain-promoted on-DNA [2+2] cycloadditions. **A:** Mechanism of strain-promoted [2+2] cycloadditions with activated olefins as calculated by density functional theory.<sup>[2]</sup> **B:** Calculated radical stabilization energies (RSE, relative to  $\cdot\text{CH}_3$ ) of radicals stabilized by functional groups relevant to this work (see **Figure 3** of the manuscript). <sup>a</sup>Energies calculated at the G3(MP2)-RAD level of theory.<sup>[3]</sup> <sup>b</sup>Energies calculated at the ROMP2 level of theory.<sup>[4]</sup> The highlighted species show relatively low RSE values, which might explain the unsuccessful [2+2] strain-promoted on-DNA cycloadditions of O-vinyl species. While vinyl ether **9q** afforded some expected product (28% display) along with numerous unidentified side products, application of vinyl acetate **9v** would not result in formation of distinct DNA species (suggesting polymerization).

### Multiple adducts form during [2+2] reactions with phenyl vinyl sulfone

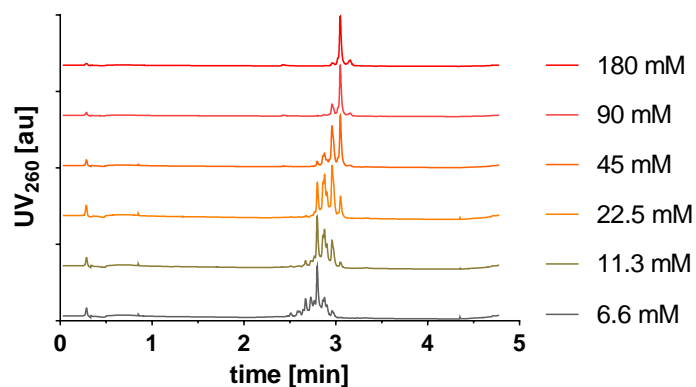

**Figure S4.** Reactions were performed with **3** (0.5 nmol), phenyl vinyl sulfone **9r** (final concentrations indicated) and cesium fluoride (200 mM final concentration) in 90% aq. DMSO (10  $\mu$ L total volume, room temperature, 1 h). Following ethanol precipitation, reaction outcomes were analyzed by UPLC-MS. As show, various species form initially and converge at higher concentrations of phenyl vinyl sulfone. The main peak in the top chromatogram exhibits a deconvoluted mass of 6369 Da in agreement with the expected [2+2] addition product (5358 Da) and six additional alkylation events ( $5358 \text{ Da} + 6 \times 168 \text{ Da} = 6366 \text{ Da}$ ). The mass of a seventh adduct (6537 Da) was observed for the same peak.

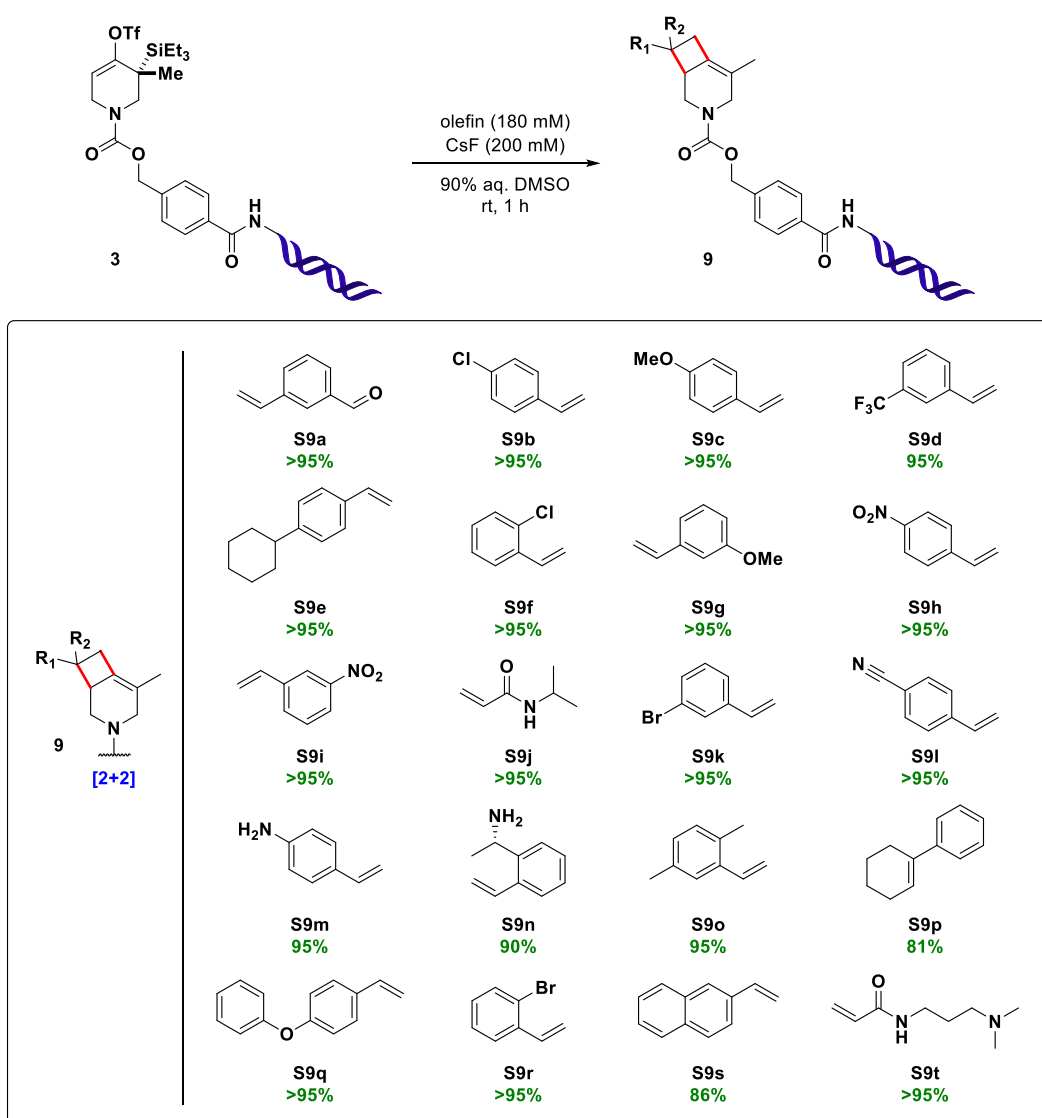

**Figure S5.** Additional examples of on-DNA strain-promoted [2+2] cycloadditions to afford compounds of type **9**. Product display (%AUC) was determined by integration of UV signals (260 nm) considering DNA-species only.

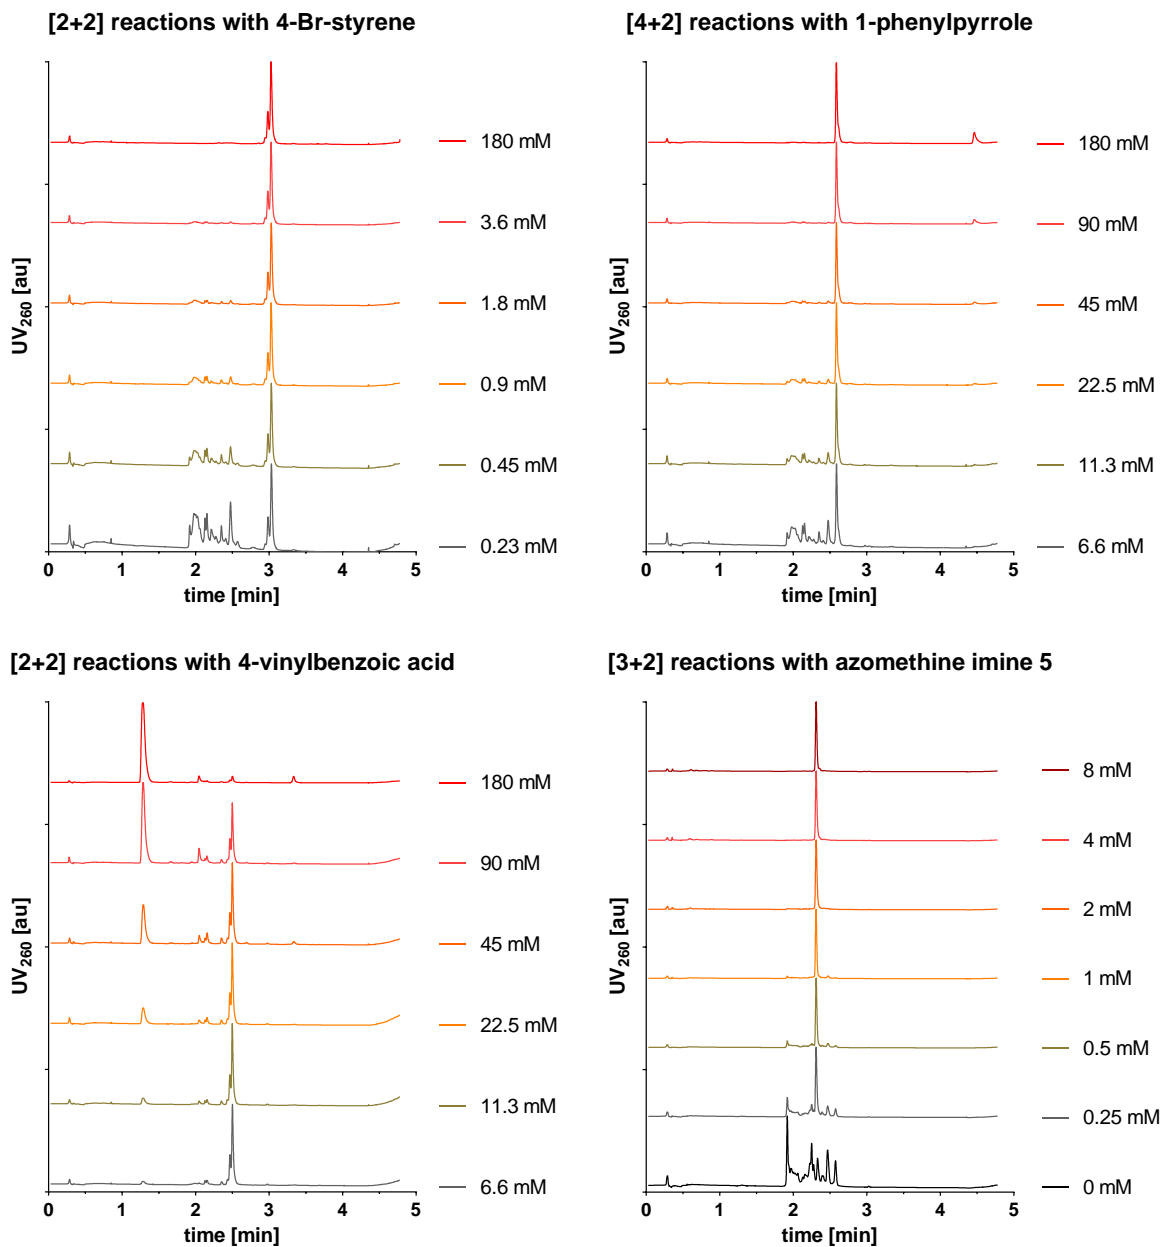

**Figure S6.** Titration of building blocks for each type of cycloaddition investigated in the present study (4-Br-styrene, 1-phenylpyrrole, 4-vinylbenzoic acid, and azomethine imine **5**). Reactions were performed with **3** (0.5 nmol) in 90% aq. DMSO (10  $\mu$ L total volume, room temperature, 1 h) with the corresponding building block at a final concentration as indicated. Final concentration of cesium fluoride was 200 mM (50 mM for [3+2] reactions with azomethine imine **5**). Following ethanol precipitation, samples were analyzed by UPLC-MS.

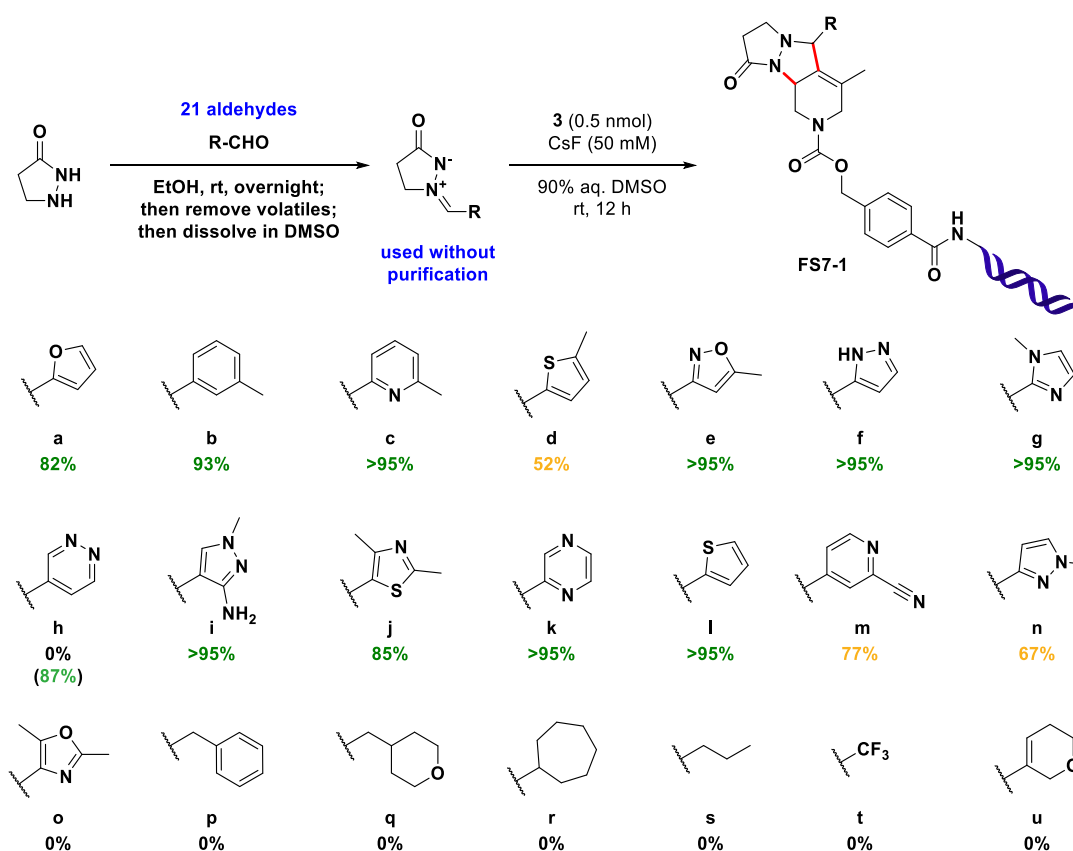

**Figure S7.** Purification-free preparation of azomethine imines and subsequent application in strain-promoted on-DNA cycloadditions. Value in parentheses corresponds to the outcome of an experiment employing the isolated and fully characterized azomethine imine. Reactions were performed with **3** (0.5 nmol) in 90% aq. DMSO (10  $\mu$ L total volume) and analyzed by UPLC-MS following ethanol precipitation. Product display (%AUC) was determined by integration of UV chromatograms (260 nm) considering DNA-species only. For analytical data, see section 5 (p. S42).

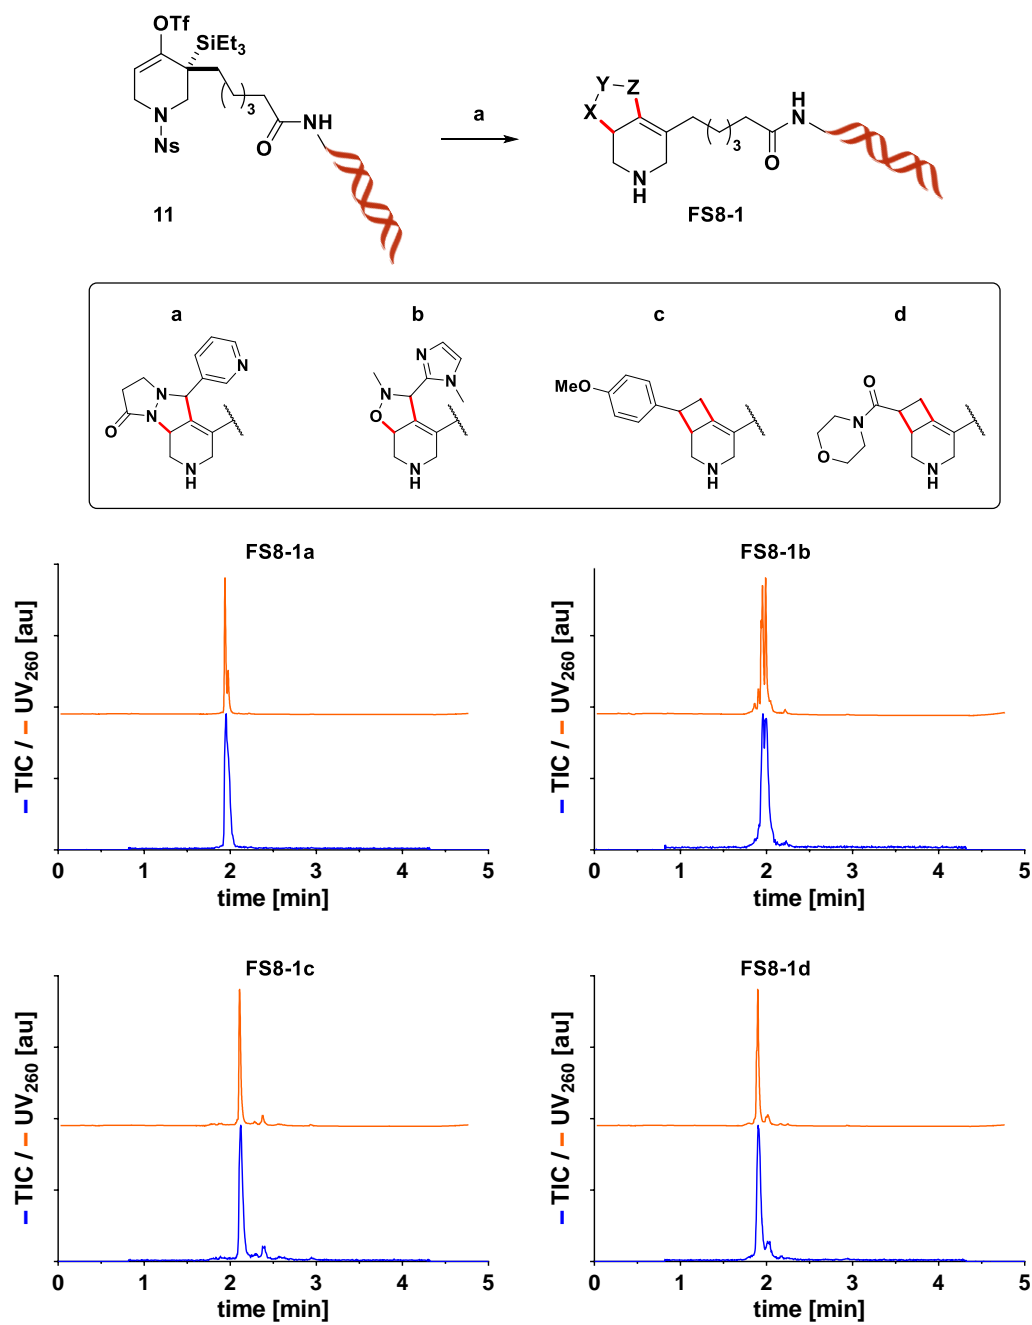

**Figure S8.** UPLC-MS traces of intermediate piperidines **FS8-1a-d** after strained-allene cycloaddition and Ns-deprotection.

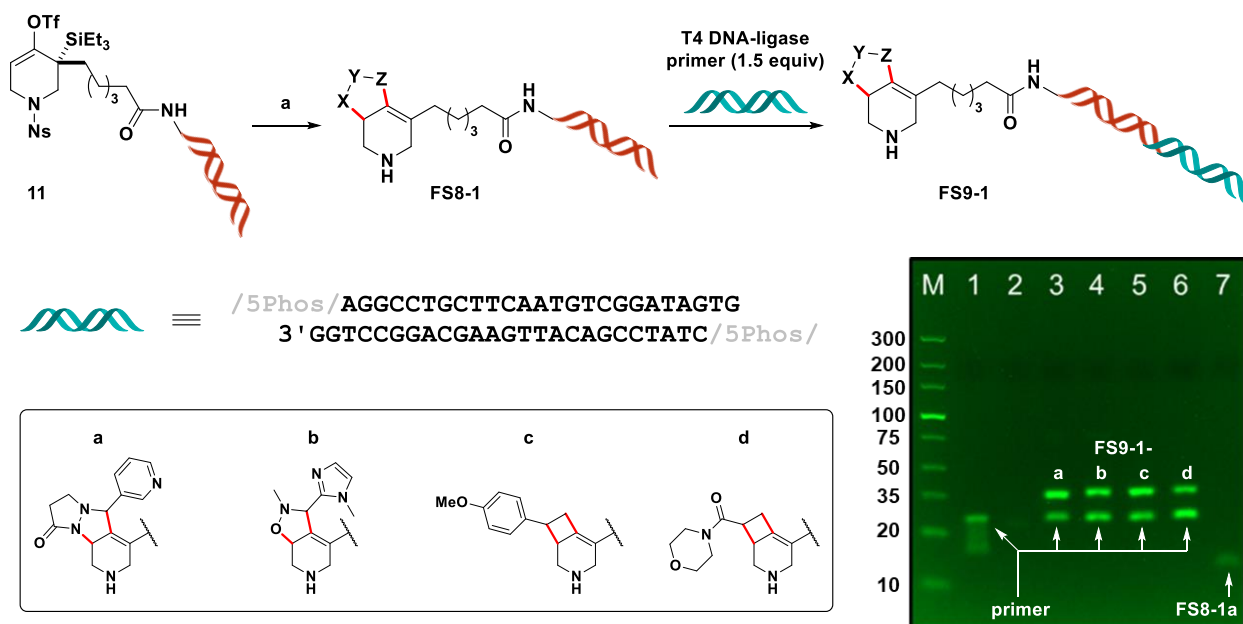

**Figure S9.** Ligation reactions of four on-DNA piperidines (**FS8-1a-d**), prepared by strain-promoted cycloaddition reactions (**Figure 4** in manuscript). Ligation conditions (4 reactions in parallel): **FS8-1a-d** (0.25 nmol per well), T4 DNA-ligase (2.5 U), 23-basepair primer (sequence shown, 1.5 equiv), ligation buffer (final concentrations: 50 mM Tris-HCl pH7.5, 10 mM MgCl<sub>2</sub>, 1 mM ATP, 10 mM DTT), room temperature, overnight. Photograph shows gel electrophoretic analysis (E-Gel EX, 4% agarose, SYBR Gold II stain, software coloration "SYBR green") of reaction outcomes. Lanes show M: molecular ladder (number of basepairs indicated), 1: primer, 2: unrelated, 3-6: ligation reactions, 7: starting material **FS8-1a**. Lanes 3-6 indicate full consumption of starting materials **FS8-1a-d** (compare lane 7) with simultaneous formation of new species (**FS9-1a-d**) in agreement with the expected products (ca. 35 basepairs).

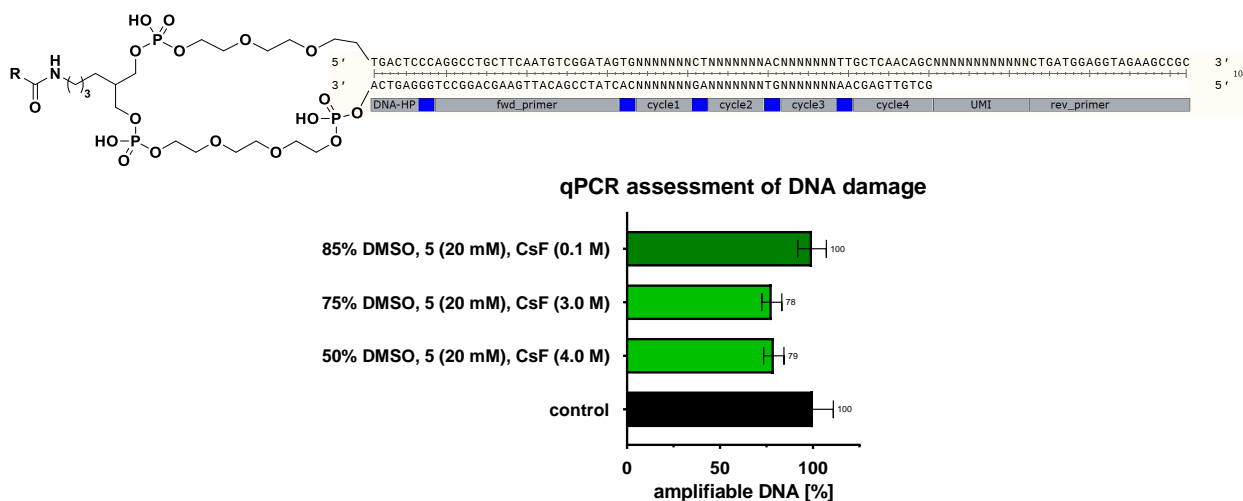

**Figure S10.** qPCR analysis of residual amplifiable material after 75 min incubation at room temperature. In a 96-well polypropylene plate, a solution of a full-length DNA-encoded library (construct shown, ca. 60 μM in water, 2 μL, ca. 0.12 nmol) was combined with water (control), DMSO solutions of azomethine imine **5** (20 mM final concentration) and aqueous cesium fluoride solutions to give final concentrations as indicated (20 μL total volume). The plate was sealed (adhesive aluminum foil), briefly vortexed, and incubated at room temperature for 75 min. All conditions were tested in triplicate (3x4 wells in total). Water (80 μL) was added and the resulting solutions were thoroughly mixed. Each sample was then diluted (two times 1:100, 2 μL sample in 198 μL water, dilution factor 1:10,000) and desalted by gel filtration (GE healthcare Illustra, G-25 microspin columns) as per the manufacturer's instruction. Amount of amplifiable material was determined by qPCR analysis in technical sextuplets (Applied Biosystems PowerUp SYBR Green Master Mix, catalog #A25742) relative to a 1:10 dilution series of the same template (DNA-encoded library).

Sample preparation: 2 μL template, 1 μL primers (5 μM each, 0.25 μM final concentration), 7 μL water, 10 μL master mix. qPCR parameters: 50 °C (60 s), 1.6 °C/s to 95 °C, then 40 cycles [90 °C (15 s), 1.0 °C/s to 60 °C (60 s), 1.6 °C/s to 90 °C].  
 fwd\_primer 5' AATGATACGGCGACACCGAGATCTACACCTCTCTATCTTAGCTCCAGCGACCTGCTTCAATGTCGGATAGTG 3'  
 rev\_primer 5' CAAGCAGAAGACGGCATACGAGATCAGCCTCGACCATGCTCACTGCGGCTTCTACCTCCATCAG 3'

### off-DNA precedence

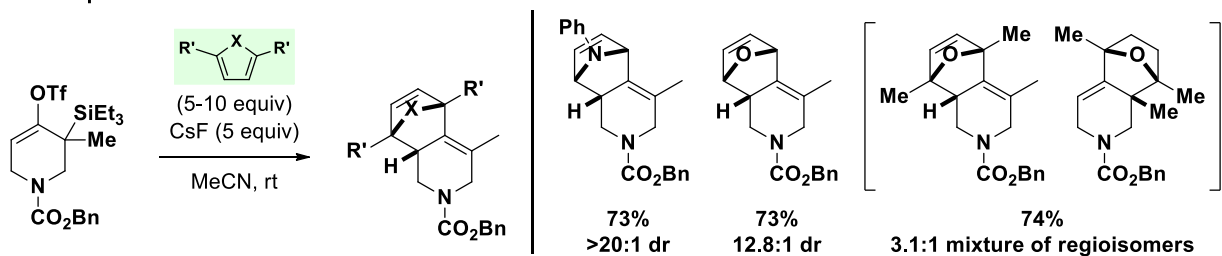

### on-DNA process

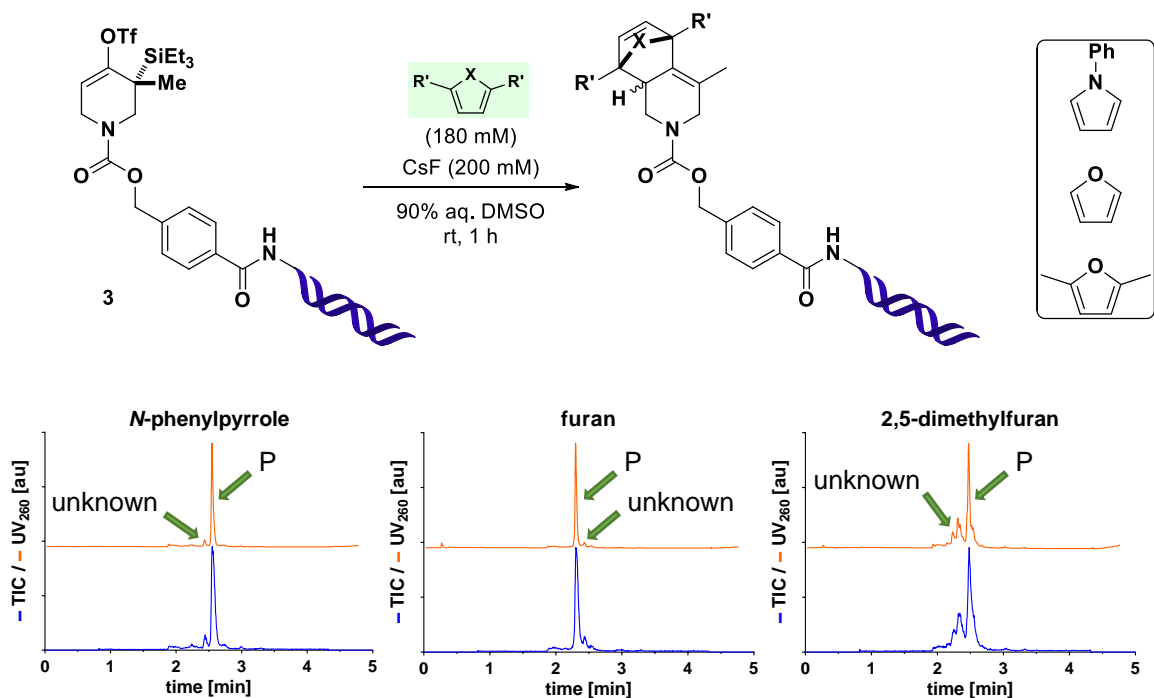

**Figure S11. Top:** off-DNA precedence of strain-promoted [4+2] cycloaddition with *N*-phenylpyrrole, furan and 2,5-dimethylfuran in MeCN. The products were formed as single diastereomer (*N*-phenylpyrrole), as diastereomerically enriched mixture (furan), and as a mixture of regioisomers (2,5-dimethylfuran), respectively. Relative configurations were assigned by 2D-NMR. **Bottom:** The corresponding on-DNA processes in 90% aq. DMSO. The reactions with *N*-phenylpyrrole and furan result in efficient formation of the expected products (mass of minor species inconclusive, possibly dimer of strained allene). The reaction with 2,5-dimethylfuran is sluggish, likely due to lower reactivity of the sterically congested building block.

### 3. General Information

#### a. Nuclear magnetic resonance (NMR) spectroscopy

NMR spectra were recorded on Bruker AV-III HD 2-channel spectrometers operating at a frequency of 400.14 MHz ( $^1\text{H}$ ) and 100.61 MHz ( $^{13}\text{C}$ ) and equipped with either a 5 mm BBO-F conventional (room temperature) probehead or a 5 mm BBO-F cryoprobe. Unless indicated otherwise, data was acquired at 25 °C using the software ICON-NMR under TopSpin program control and processed with MestReNova (Version 12.0.2-20910). Spectra were referenced to residual solvent resonance according to literature.<sup>[5]</sup> For spectra recorded at elevated temperatures, the same literature values of residual solvent resonances (at ambient temperature) were used for referencing, neglecting temperature-dependent peak shifts. Resonance signals are reported as chemical shifts ( $\delta$ ) in ppm with multiplicity (s = singlet, d = doublet, t = triplet, q = quartet, m = multiplet or unresolved, br = broad signal), couplings constant(s) in Hertz (Hz) and integral (not for  $^{13}\text{C}$ ).  $^{13}\text{C}$  and  $^{19}\text{F}$  NMR spectra were recorded with broadband  $^1\text{H}$  decoupling.

#### b. Reaction monitoring by ultra-performance liquid chromatography-mass spectrometry (UPLC-MS)

Samples were resolved on various Waters ACQUITY systems equipped with C18 columns (ACQUITY UPLC BEH C18 1.7  $\mu\text{m}$ , 2.1x30 mm, ACQUITY UPLC BEH C18 1.7  $\mu\text{m}$ , 2.1x50 mm, or ACQUITY UPLC CSH C18 1.7  $\mu\text{m}$ , 2.1x50 mm) kept at 50 °C. UV signal was recorded with ACQUITY UPLC PDA detectors (210–400 nm). Light scattering signal was recorded with ACQUITY UPLC ELSD or SofTA 1100 ELSD detectors. Low-resolution mass spectra (LRMS) of eluting species were recorded with Waters SQD, SQD-2 or QDa detectors (electron spray ionization (positive and negative modes), scan time 0.3 sec, scanning range 120-1250 Da (QDa), 120-1600 Da (SQD) or 120-2850 Da (SQD-2)). High-resolution mass spectra (HRMS) of eluting species were recorded on systems equipped with Waters Xevo G2 Qtof or Waters Xevo G2-XS Tof detectors (electron spray ionization (positive mode), scan time 0.2 sec, scanning range 100-2050 Da).

|            |                                            |
|------------|--------------------------------------------|
| Solvent A1 | 0.1% formic acid in water                  |
| Solvent B1 | 0.1% formic acid in acetonitrile           |
| Solvent A2 | 5 mM ammonium hydroxide in water           |
| Solvent B2 | 5 mM ammonium hydroxide in acetonitrile    |
| Solvent A3 | 0.05% trifluoroacetic acid in water        |
| Solvent B3 | 0.05% trifluoroacetic acid in acetonitrile |

##### RXNMON-Acidic

flow: 1.0 mL/min, runtime: 2.0 min

column: ACQUITY UPLC BEH C18 1.7  $\mu\text{m}$ , 2.1x30 mm

| time | %A (solvent A1) | %B (solvent B1) |
|------|-----------------|-----------------|
| 0.00 | 98              | 2               |
| 0.10 | 98              | 2               |
| 1.50 | 2               | 98              |
| 1.80 | 2               | 98              |
| 1.90 | 98              | 2               |
| 2.00 | 98              | 2               |

##### RXNMON-Basic

flow: 1.0 mL/min, runtime: 2.0 min

column: ACQUITY UPLC BEH C18 1.7  $\mu\text{m}$ , 2.1x30 mm

| time | %A (solvent A2) | %B (solvent B2) |
|------|-----------------|-----------------|
| 0.00 | 98              | 2               |
| 0.10 | 98              | 2               |
| 1.50 | 2               | 98              |

|      |    |    |
|------|----|----|
| 1.80 | 2  | 98 |
| 1.90 | 98 | 2  |
| 2.00 | 98 | 2  |

#### ProductAnalysis-Acidic

flow: 1.0 mL/min, runtime: 5.2 min

column: ACQUITY UPLC BEH C18 1.7  $\mu$ m, 2.1x50 mm

| time | %A (solvent A1) | %B (solvent B1) |
|------|-----------------|-----------------|
| 0.00 | 98              | 2               |
| 4.40 | 2               | 98              |
| 5.15 | 2               | 98              |
| 5.19 | 98              | 2               |

#### ProductAnalysis-Basic

flow: 1.0 mL/min, runtime: 5.2 min

column: ACQUITY UPLC BEH C18 1.7  $\mu$ m, 2.1x50 mm

| time | %A (solvent A2) | %B (solvent B2) |
|------|-----------------|-----------------|
| 0.00 | 98              | 2               |
| 4.40 | 2               | 98              |
| 5.15 | 2               | 98              |
| 5.19 | 98              | 2               |

#### HRMS

flow: 1.0 mL/min, runtime: 2.2 min

column: ACQUITY UPLC CSH C18 1.7  $\mu$ m, 2.1x50 mm

| time | %A (solvent A3) | %B (solvent B3) |
|------|-----------------|-----------------|
| 0.00 | 98              | 2               |
| 0.06 | 98              | 2               |
| 1.76 | 2               | 98              |
| 2.00 | 2               | 98              |
| 2.16 | 98              | 2               |

### c. Ion-pair chromatographic analysis of DNA-conjugates by ultra-performance liquid chromatography-mass spectrometry (UPLC-MS)

Samples were resolved on a Waters ACQUITY system equipped with a C18 column (ACQUITY Oligonucleotide BEH C18 1.7  $\mu$ m, 2.1x50 mm, part #186003949) kept at 50 °C. UV signal was recorded with an ACQUITY TUV detector (260 nm, sampling rate 20 points/sec). Mass spectra of eluting species were recorded with a Waters SQ Detector 2 connected to a ZSpray™ source (negative ion mode, scan time 0.2 sec, scanning range 500-3000 Da, MaxEnt1 deconvolution, processing 2-20k Da).

#### Standard method (5-50% B)

flow: 0.5 mL/min, runtime: 6.0 min, injection volume: 10  $\mu$ L, temp: 50 °C

column: ACQUITY Oligonucleotide BEH C18 1.7  $\mu$ m, 2.1x50 mm

solvent A: 250 mM hexafluoroisopropanol and 8 mM triethylamine in water

solvent B: methanol

| time | %A (solvent A) | %B (solvent B) |
|------|----------------|----------------|
| 0.00 | 95             | 5              |
| 4.00 | 50             | 50             |
| 4.50 | 5              | 95             |
| 5.00 | 5              | 95             |
| 5.10 | 95             | 5              |
| 6.00 | 95             | 5              |

### d. Preparative high performance liquid chromatography (prep-HPLC)

Purifications were performed on a Waters system equipped with Waters 515 pumps, a Waters 2545 binary gradient module, a Waters Acquity QDa detector, a Waters 2998 PDA detector and a Waters 2767 sample manager. The column (Waters XBridge Prep C18 OBD, 5  $\mu$ m, 30 mm (inner diameter) x 50 mm) was kept at room temperature. Material was injected as solution in methanol/water mixtures (1.5 mL) and eluted with gradients of solvent A (water) and solvent B (acetonitrile), both modified with either 0.1% formic acid or 5 mM ammonium hydroxide (75 mL/min flowrate). Fraction collection was triggered by UV signal and mass (TIC) of eluting species. Predefined gradients were picked from a list of methods optimized for target retention time as observed during reaction monitoring by UPLC-MS.

#### e. Preparative high performance liquid chromatography of oligonucleotide-conjugates (microprep-HPLC)

Purifications were performed on an Agilent Infinity system equipped with an Infinity 1260 Bio Quat Pump (pump system, G5611A), an Infinity 1260 HiP Bio ALS (autosampler, G1330B), an Infinity 1290 TCC (thermostatted column compartment, G5667A), an Infinity 1260 DAD (diode array detector, G4212B), and an Infinity 1260 Bio FC-AS (fraction collector, G5664A) under Agilent OpenLab CDS (C.01.07 SR1) software control. The column (Waters XBridge BEH C18 OBD, 130 Å, 5  $\mu$ m, 10x150 mm) was kept at 50 °C. Material was injected as aqueous solutions (up to 100  $\mu$ L per injection) and eluted with gradients of solvent A (50 mM triethylammonium acetate in water) and solvent B (MeOH). Fraction collection was triggered by UV (260 nm).

##### 10-70% method

flow: 5.0 mL/min, runtime: 20 min

column: Waters XBridge BEH C18 OBD, 130 Å, 5  $\mu$ m, 10x150 mm

| time | %A (solvent A) | %B (solvent B) |
|------|----------------|----------------|
| 0.0  | 90             | 10             |
| 15.0 | 30             | 70             |
| 16.0 | 5              | 95             |
| 18.0 | 5              | 95             |
| 18.1 | 90             | 10             |
| 20.0 | 90             | 10             |

#### f. Other methods and equipment

Aqueous solutions of DNA were quantified photospectrometrically with a Thermo Scientific Nanodrop One. Electrophoresis was performed with an Invitrogen E-GEL Power Snap device using commercial gels (E-Gel EX, 4% agarose). Centrifugation was performed with a Beckman Coulter Allegra X-15R or Beckman Coulter Microfuge 18.

#### g. Flash chromatography

Automated flash chromatography was performed on Teledyne ISCO CombiFlash® systems equipped with TUV and ELSD detectors using prepacked columns (RediSep® Rf, prepacked with 4 g, 12 g, 24 g, 40 g, 80 g, 120 g, or 330 g silica, 35-70  $\mu$ m). Crude material was usually adsorbed on diatomaceous earth (Biotage Isolute HM-N) and then subjected to chromatography (dry-loading) eluting with gradients of ethyl acetate in heptane, methanol in dichloromethane, or as specified. Fractions containing homogeneous material according to detection method (TUV/ELSD) and/or thin layer chromatography (TLC) were pooled and solvents were removed by rotary evaporation under reduced pressure at 40 or 45 °C to afford target compounds.



## **b. General procedures**

### **GP1: Ethanol precipitation of 10 $\mu$ L reactions in a 96-well PCR plate**

Aq. NaCl (5 M, 1  $\mu$ L) and EtOH (30  $\mu$ L) were added. The plate was heat-sealed (Eppendorf heat-sealing foil), briefly vortexed and incubated on dry ice for 30 to 60 min. After centrifugation (5 min at 3700 RCF), the seal was taken off. The supernatant was removed by covering the plate with a paper towel and cautiously inverting. 80% aq. EtOH (40  $\mu$ L) was added to the wells. The plate was heat-sealed and vortexed. After centrifugation (5 min at 3700 RCF), the supernatant was removed as before. EtOH (40  $\mu$ L) was added and the procedure (sealing, vortexing, centrifugation, removal of supernatant) was repeated as before. Water (25  $\mu$ L) was added and the plate was sealed (heat-sealing or using an adhesive foil). Samples were then analyzed by UPLC-MS.

### **GP2: Ethanol precipitation of larger scale reactions**

To a reaction of a given volume (100% v/v), aq. NaCl (5 M, 10% v/v) and EtOH (300% v/v) were added. The reaction vessel (usually an Eppendorf tube) was briefly vortexed and incubated on dry ice for 30 to 60 min. After centrifugation (5 min at 11000 RCF), the supernatant was removed by pipette. To wash the pellet, 80% aq. EtOH (100-200% v/v) was added. The mixture was vortexed (or briefly sonicated). After centrifugation (5 min at 11000 RCF), the supernatant was removed by pipette. The washing procedure was repeated with 100% EtOH (100-200% v/v) and the obtained pellet was dried under vacuum.

### **GP3: on-DNA strain-promoted cycloaddition reactions (10 $\mu$ L total volume)**

In a 96-well polypropylene PCR plate, an aq. solution of the corresponding DNA-conjugated strained-allene precursor (0.5 or 1 mM, 0.5  $\mu$ L, 0.25 or 0.5 nmol) was combined with a solution of a cycloaddition partner (1,3-dipole, activated olefin, or *N*-substituted pyrrole) in DMSO (e.g. 200 mM, 9  $\mu$ L, 180 mM final concentration) and the plate was spun down. An aq. solution of cesium fluoride (e.g. 4 M in 100 mM bicarbonate buffer pH10, 0.5  $\mu$ L, 200 mM final concentration) was added. The plate was heat-sealed (Eppendorf heat-sealing foil) and allowed to stand for a few minutes to cool. The plate was briefly vortexed, spun down and incubated at room temperature for 1 h. Following ethanol precipitation according to **GP1**, samples were analyzed by UPLC-MS.

### c. Synthesis of DNA-conjugate 3

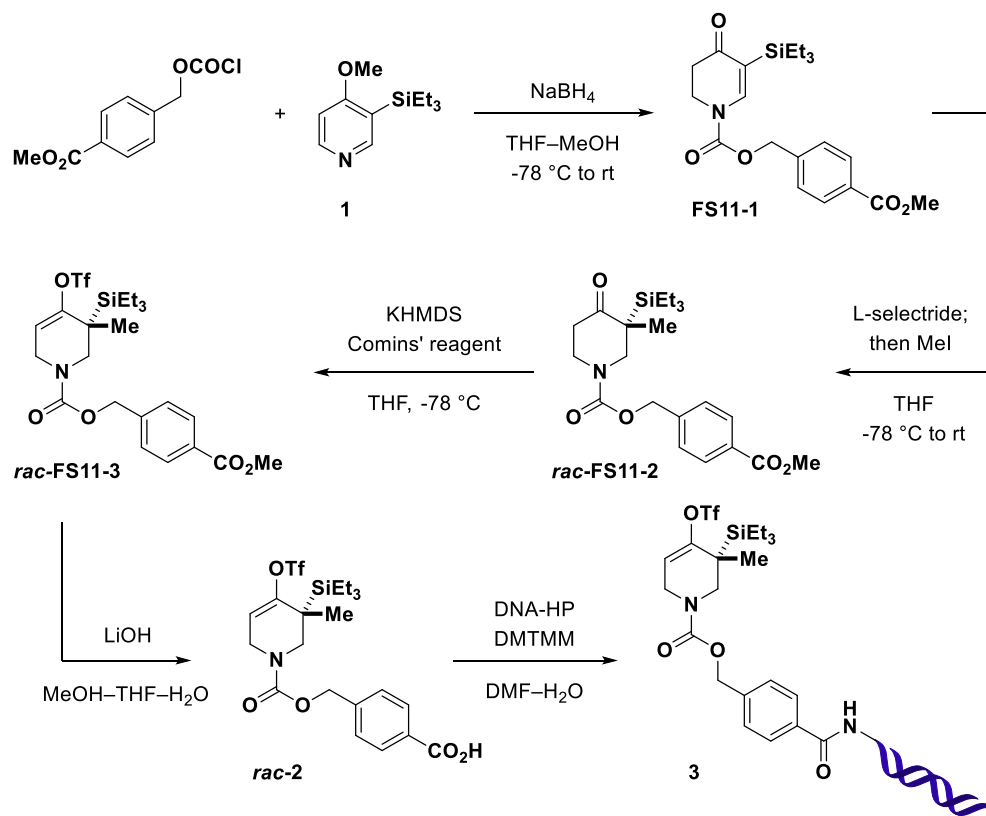

Figure S11 Synthetic route towards on-DNA strained allene precursor 3.

### Synthesis of FS11-1

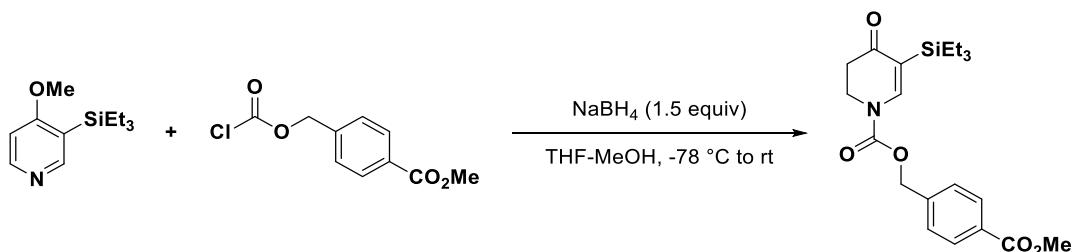

4-Methoxy-3-(triethylsilyl)pyridine (**1**) (4.47 g, 20.0 mmol, 1.0 equiv) was dissolved in MeOH (80 mL) and cooled to  $-78\text{ }^\circ\text{C}$ .  $\text{NaBH}_4$  (1.14 g, 30.0 mmol, 1.5 equiv) was added. A solution of 4-methoxycarbonylphenyl chloroformate (5.72 g, 25.0 mmol, 1.25 equiv) in THF (20 mL) was added via addition funnel over 10 min. Upon completion of the addition, the mixture had turned into a colorless suspension. The cooling bath was removed and the suspension was stirred for another 20 min. Aqueous HCl (10%, 50 mL) was added. After stirring for 5 min, the mixture was diluted with water (300 mL) and extracted with  $\text{CH}_2\text{Cl}_2$  (1x 100 mL, 2x 50 mL). The combined organic extracts were washed with brine (100 mL), dried with  $\text{MgSO}_4$ , filtered and concentrated. Flash chromatography on silica (10% EtOAc in heptane to 30%) afforded **FS11-1** (6.74 g, 16.7 mmol, 84% yield) as colorless oil.

$^1\text{H NMR}$  (400 MHz,  $\text{CDCl}_3$ )  $\delta$  = 8.09 - 8.03 (m, 2H), 7.80 (s, 1H), 7.49 - 7.42 (m, 2H), 5.31 (s, 2H), 4.05 - 3.98 (m, 2H), 3.92 (s, 3H), 2.59 - 2.50 (m, 2H), 0.90 (t,  $J$  = 7.8 Hz, 9H), 0.68 (q,  $J$  = 8.7, 8.1 Hz, 6H).

**<sup>13</sup>C NMR** (101 MHz, CDCl<sub>3</sub>)  $\delta$  = 196.6, 166.7, 152.8 (br), 147.9 (br), 140.2, 130.5, 130.1, 127.9, 113.8, 68.1, 52.4, 42.7, 36.2, 7.5, 3.0. **LRMS** (ESI+) req. for C<sub>21</sub>H<sub>30</sub>NO<sub>5</sub>Si [M+H]<sup>+</sup> 404.2, found 404.4.

### Synthesis of *rac*-FS11-2

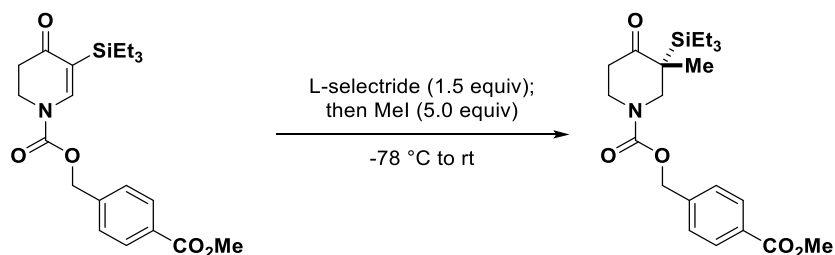

**FS11-1** (2.53 g, 6.27 mmol, 1.0 equiv) was dissolved in THF (31 mL) and cooled to  $-78^{\circ}\text{C}$ . A solution of L-selectride in THF (1 M, 9.4 mL, 9.4 mmol, 1.5 equiv) was added via syringe. The resulting yellow solution was stirred at  $-78^{\circ}\text{C}$  for 100 min. UPLC-MS analysis (RXNMON-Acidic) confirmed full consumption of starting material. Methyl iodide (2 mL, 31.3 mmol, 5 equiv) was added and the cooling bath was removed. The yellow solution was stirred under exclusion of light for 4.5 h. NEt<sub>3</sub> (3.5 mL, 25.1 mmol, 4 equiv) was then added to quench excess methyl iodide. The resulting suspension was stirred for 5 min, before it was diluted with water (300 mL). Organic material was extracted with CH<sub>2</sub>Cl<sub>2</sub> (3x 50 mL). The combined organic extracts were washed with brine (100 mL), dried with MgSO<sub>4</sub>, filtered and concentrated. Flash chromatography on silica (5% EtOAc in heptane to 25%) afforded *rac*-**FS11-2** (1.62 g, 3.9 mmol, 62% yield) as colorless oil.

**<sup>1</sup>H NMR** (400 MHz, *d*<sub>8</sub>-PhMe, 80  $^{\circ}\text{C}$ )  $\delta$  = 8.03 - 7.93 (m, 2H), 7.25 - 7.14 (m, 2H), 5.10 - 4.95 (m, 2H), 3.87 (dd,  $J$  = 14.0, 4.4 Hz, 1H), 3.73 - 3.64 (m, 1H), 3.60 - 3.51 (m, 3H), 3.27 - 3.09 (m, 2H), 2.30 - 2.17 (m, 1H), 2.16 - 2.05 (m, 1H), 1.12 - 1.05 (m, 3H), 0.88 (dd,  $J$  = 9.1, 6.6 Hz, 9H), 0.56 (qt,  $J$  = 11.6, 5.1 Hz, 6H). **<sup>13</sup>C NMR** (101 MHz, *d*<sub>8</sub>-PhMe, 80  $^{\circ}\text{C}$ )  $\delta$  = 209.7, 166.4, 155.2, 142.4, 137.7, 131.0, 130.2, 66.9, 51.6, 50.4, 45.5, 42.9, 39.5, 18.7, 7.9, 2.9. **HRMS** (ESI+) req. for C<sub>22</sub>H<sub>34</sub>NO<sub>5</sub>Si [M+H]<sup>+</sup> 420.2201, found 420.2219.

### Synthesis of *rac*-FS11-3

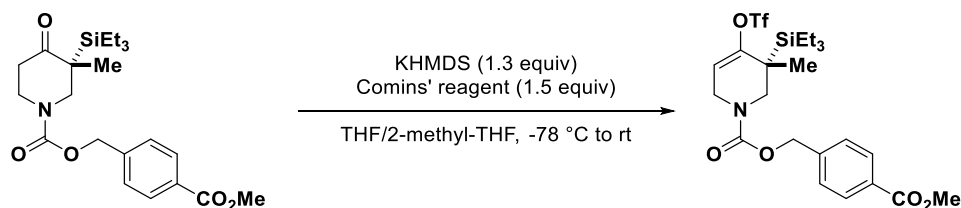

*rac*-**FS11-2** (50 mg, 0.12 mmol, 1.0 equiv) was combined with THF (0.5 mL) and 2-[*N,N*-Bis(trifluoromethylsulfonyl)amino]-5-chloropyridine (Comins' reagent) (70 mg, 0.18 mmol, 1.5 equiv) was added. The mixture was cooled to  $-78^{\circ}\text{C}$  before a solution of KHMDS in THF (1 M, 0.16 mL, 0.16 mmol, 1.3 equiv) was added over 5 min. The reaction mixture was stirred for 45 min, then at room temperature for another 30 min. The mixture was diluted with EtOAc (150 mL), washed with half-saturated brine (3x 30 mL), sat. aq. sodium bicarbonate (30 mL) and brine (30 mL), dried with MgSO<sub>4</sub>, filtered and concentrated. Flash chromatography on silica (0% EtOAc in heptane to 20%) afforded *rac*-**FS11-3** (25 mg, 0.045 mmol, 38% yield).

**<sup>1</sup>H NMR** (400 MHz, *d*<sub>8</sub>-PhMe, 80  $^{\circ}\text{C}$ )  $\delta$  = 8.04 - 7.91 (m, 2H), 7.20 - 7.10 (m, 2H), 5.36 (t,  $J$  = 3.5 Hz, 1H), 5.08 - 4.87 (m, 2H), 3.78 - 3.55 (m, 3H), 3.54 (s, 3H), 3.14 (d,  $J$  = 13.2 Hz, 1H), 1.06 (s, 3H), 0.88 (t,  $J$  = 7.9 Hz, 9H), 0.63 - 0.53 (m, 6H). **<sup>13</sup>C NMR** (101 MHz, *d*<sub>8</sub>-PhMe, 80  $^{\circ}\text{C}$ )  $\delta$  = 166.3, 155.2, 154.9, 142.1, 137.7,

131.1, 130.3, 119.3 (q,  $J = 320.1$  Hz), 110.2, 67.0, 51.5, 50.8, 42.8, 31.9, 18.7, 7.8, 3.0. **HRMS** (ESI+) req. for  $C_{23}H_{33}F_3NO_7Si$   $[M+H]^+$  552.1694, found 552.1729.

### Synthesis of *rac-2*

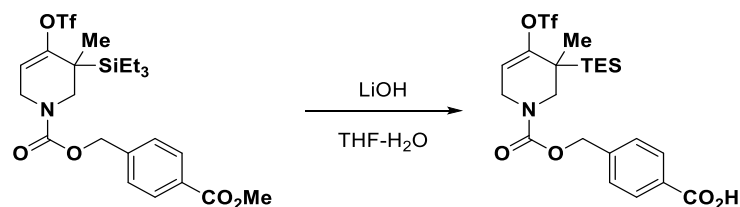

***rac*-FS11-3** (79 mg, 0.143 mmol, 1.0 equiv) was dissolved in THF (1 mL). The solution was cooled to 0 °C and an aqueous solution of lithium hydroxide (1 M, 0.43 mL, 0.43 mmol, 3.0 equiv) was added. The resulting cloudy mixture was stirred overnight (thereby allowed to reach room temperature). The mixture was diluted with water (50 mL). Aqueous HCl (1 M, 5 mL) was added and the organic material was extracted with  $CH_2Cl_2$  (3x 15 mL). The combined organic fractions were dried with  $MgSO_4$ , filtered and concentrated. The residue was dissolved in MeOH (0.5 mL) and filtered via syringe filter applying positive pressure (nitrogen) to force the solution through the filter. Material transfer was quantitated with additional MeOH (2x 0.5 mL). The filtrate was subjected to preparative HPLC (acidic, 55% to 80% MeCN in water) to afford ***rac*-2** (15 mg, 0.028 mmol, 19% yield).

**$^1H$  NMR** (400 MHz, *d*8-PhMe, 80 °C)  $\delta$  = 8.05 – 7.97 (m, 2H), 7.13 (d,  $J = 8.0$  Hz, 2H), 5.36 (t,  $J = 3.5$  Hz, 1H), 5.04 – 4.87 (m, 2H), 3.80 – 3.51 (m, 3H), 3.15 (d,  $J = 13.3$  Hz, 1H), 1.07 (s, 3H), 0.89 (t,  $J = 7.9$  Hz, 9H), 0.58 (q,  $J = 7.6$  Hz, 6H).  **$^{13}C$  NMR** (101 MHz, *d*8-PhMe, 80 °C)  $\delta$  = 154.9, 143.0, 130.8, 110.1, 67.0, 50.9, 42.8, 31.9, 18.7, 7.8, 3.0.  **$^{19}F$  NMR** (377 MHz, *d*8-PhMe)  $\delta$  = -75.1. **HRMS** (ESI+) req. for  $C_{22}H_{31}F_3NO_7Si$   $[M+H]^+$  538.1537, found 538.1547.

### Synthesis of 3

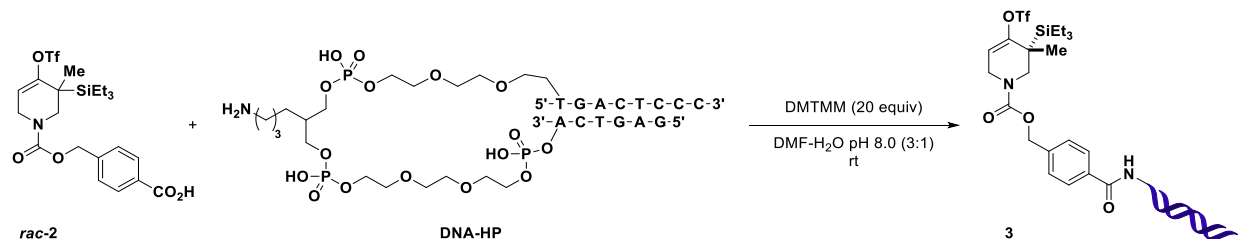

***rac*-2** (3 mg, 5.6  $\mu$ mol, ca. 28 equiv) was dissolved in DMF (0.6 mL) and added to a solution of DNA-HP (1 mM, 200  $\mu$ L, 200 nmol) in phosphate buffer (100 mM, pH8.0). A freshly prepared solution of DMTMM in water (400 mM, 10  $\mu$ L, 4  $\mu$ mol, 20 equiv) was added. The resulting mixture was vortexed, spun down and incubated at room temperature for 3 h (UPLC-MS indicated full consumption of DNA-HP). The solution was transferred to a 20 mL centrifuge tube (Falcon®). Material transfer was quantitated with water (2x 0.1 mL, total volume now ca. 1 mL). Aq. NaCl (5 M, 0.1 mL) and EtOH (2.8 mL) were added. The mixture was vortexed and incubated on dry ice for 30 min. After centrifugation and removal of the supernatant, the pellet was washed with EtOH (5 mL, brief sonication, centrifugation, removal of supernatant), and then dried under high vacuum for 10 min. The pellet was dissolved in water (0.18 mL) and subjected to preparative HPLC (microprep-HPLC, 10-70% method). Fractions containing product were pooled and lyophilized. Material was transferred to an Eppendorf tube as solution in water (2x 0.5 mL, 1x 0.3 mL water). After lyophilization, the residue was dissolved in water (2x 50  $\mu$ L) and desalted by spin-column chromatography (illustra MicroSpin G-25, GE healthcare) as per the manufacturer's instructions. DNA concentration of the

eluant was determined photospectrometrically (Nanodrop One): 4.988 g/L (1 mM, calculated with MW = 5000 Da, volume by pipette: V = 113  $\mu$ L, 113 nmol, 57% yield).

MS (ESI-) expected for  $C_{176}H_{243}F_3N_{53}O_{107}P_{17}SSi$  [M] 5454 Da, found 5455 Da.

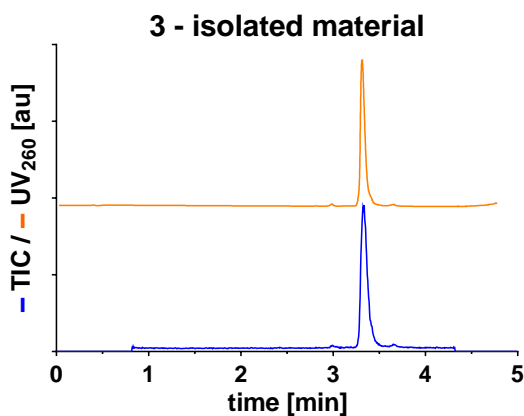

#### d. Synthesis of DNA-conjugate 11

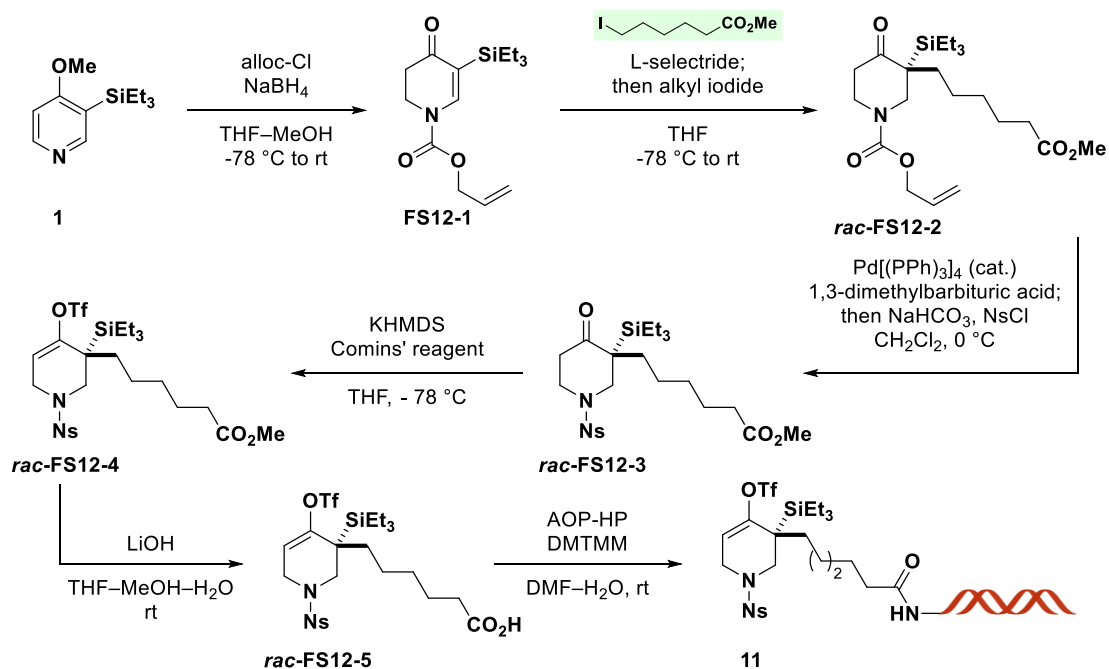

Figure S12 Synthetic route towards on-DNA strained allene precursor 11.

## Synthesis of FS12-1

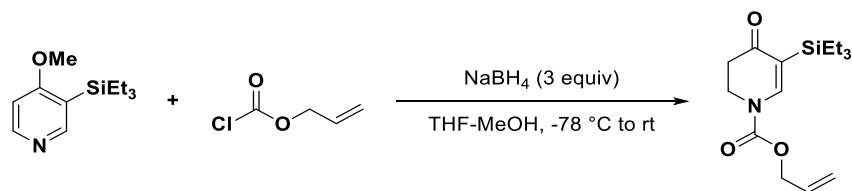

**1** (5.1 g, 22.8 mmol, 1.0 equiv) was dissolved in MeOH (60 mL) and cooled to  $-78^{\circ}\text{C}$ . Sodium borohydride (2.59 g, 68.5 mmol) was added. A solution of allyl chloroformate (6.88 g, 57.1 mmol, 2.5 equiv) in THF (15 mL) was added via syringe over 10 min. Upon completion of the addition, the mixture had turned into a colorless suspension. The cooling bath was removed and it was stirred for another 20 min. Aq. HCl (10%, 50 mL) was added. After stirring for 5 min, the mixture was diluted with water (300 mL) and extracted with EtOAc (3x 50 mL). The combined organic extracts were washed with brine (100 mL), dried with  $\text{MgSO}_4$ , filtered and concentrated. Flash chromatography on silica (5% EtOAc in heptane to 20%) afforded **FS12-1** (6.15 g, 20.8 mmol, 91% yield) as colorless oil.

$^1\text{H}$  NMR (400 MHz,  $\text{CDCl}_3$ )  $\delta$  = 7.77 (s, 1H), 5.95 (ddt,  $J$  = 16.5, 11.0, 5.7 Hz, 1H), 5.39 - 5.26 (m, 2H), 4.74 - 4.68 (m, 2H), 4.01 - 3.95 (m, 2H), 2.55 - 2.48 (m, 2H), 0.88 (t,  $J$  = 7.9 Hz, 9H), 0.67 (q,  $J$  = 8.1 Hz, 6H).

$^{13}\text{C}$  NMR (101 MHz,  $\text{CDCl}_3$ )  $\delta$  = 196.7, 152.8 (br), 148.1 (br), 131.6, 119.1, 113.3, 67.8, 42.6, 36.2, 7.5, 3.0.

LRMS (ESI+) req. for  $\text{C}_{15}\text{H}_{26}\text{NO}_3\text{Si}$   $[\text{M}+\text{H}]^+$  296.2, found 297.2.

## Synthesis of *rac*-FS12-2

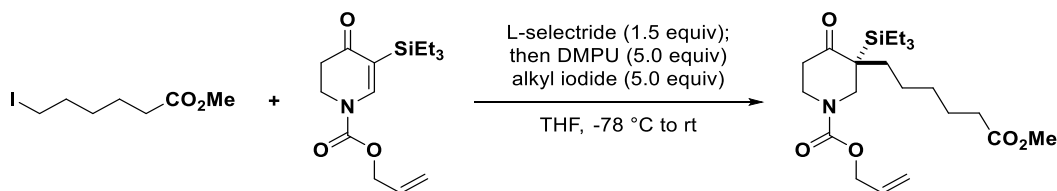

**FS12-1** (1.0 g, 3.38 mmol, 1.0 equiv) was dissolved in THF (10 mL) and cooled to  $-78^{\circ}\text{C}$ . A solution of L-selectride in THF (1.0 M, 5.1 mL, 5.1 mmol, 1.5 equiv) was added dropwise over 5 min. The resulting slightly yellow solution was stirred for 1 h (UPLC-MS indicated full consumption of starting material). DMPU (2.0 mL, 16.9 mmol, 5.0 equiv) was added, followed by methyl 6-iodohexanoate (4.33 g, 16.9 mmol, 5.0 equiv). The resulting solution was stirred overnight under exclusion of light (thereby allowed to reach room temperature). The yellow solution was diluted with water (150 mL) and extracted with EtOAc (3x 30 mL). The combined organic extracts were washed with brine, dried with  $\text{MgSO}_4$ , filtered and concentrated. Flash chromatography on silica (0% EtOAc in heptane to 30%) afforded contaminated material. A second flash chromatography on silica (5% EtOAc in heptane to 30%) afforded *rac*-**FS12-2** (338 mg, 0.79 mmol, 23% yield) as colorless oil.

An analogous reaction employing **FS12-1** (2.6 g, 8.8 mmol, 1.0 equiv), L-selectride (1 M in THF, 13.2 mmol, 1.5 equiv) and alkyl iodide (6.3 g, 24.6 mmol, 2.8 equiv) afforded *rac*-**FS12-2** (605 mg, 1.42 mmol, 16% yield).

$^1\text{H}$  NMR (400 MHz,  $d_8$ -PhMe,  $80^{\circ}\text{C}$ )  $\delta$  = 5.83 (ddt,  $J$  = 17.3, 10.5, 5.7 Hz, 1H), 5.15 (dq,  $J$  = 17.2, 1.6 Hz, 1H), 5.03 (dq,  $J$  = 10.4, 1.4 Hz, 1H), 4.53 (dt,  $J$  = 5.7, 1.4 Hz, 2H), 3.77 (dd,  $J$  = 14.1, 0.9 Hz, 1H), 3.71 - 3.53 (m, 2H), 3.37 (s, 3H), 3.20 (ddd,  $J$  = 12.7, 10.5, 5.6 Hz, 1H), 2.24 (ddd,  $J$  = 15.5, 10.5, 7.3 Hz, 1H), 2.14 - 1.97 (m, 5H), 1.52 (p,  $J$  = 7.3 Hz, 2H), 1.43 - 1.30 (m, 1H), 1.30 - 1.09 (m, 5H), 0.92 (t,  $J$  = 7.9 Hz, 9H), 0.70 - 0.53 (m, 6H).  $^{13}\text{C}$  NMR (101 MHz,  $d_8$ -PhMe,  $80^{\circ}\text{C}$ )  $\delta$  = 209.6, 173.1, 155.2, 134.1, 117.4, 66.3, 50.8, 50.5, 46.9, 42.3, 39.9, 34.2, 34.1, 30.5, 25.7, 25.2, 8.0, 3.2. HRMS (ESI+) req. for  $\text{C}_{22}\text{H}_{40}\text{NO}_5\text{Si}$   $[\text{M}+\text{H}]^+$  426.2670, found 426.2700; req. for  $\text{C}_{22}\text{H}_{39}\text{NNaO}_5\text{Si}$   $[\text{M}+\text{Na}]^+$  448.2490, found 448.2512.

## Synthesis of *rac*-FS12-3

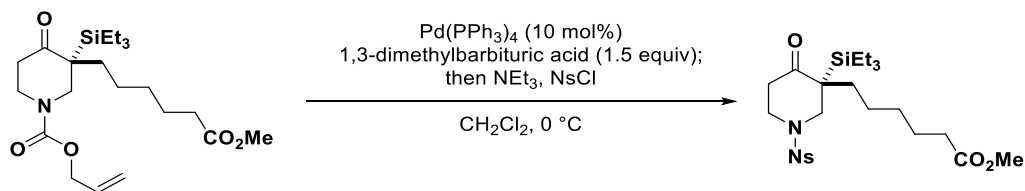

***rac*-FS12-2** (421 mg, 0.99 mmol, 1.0 equiv) was dissolved in CH<sub>2</sub>Cl<sub>2</sub> (20 mL) and cooled to 0 °C. 1,3-Dimethylbarbituric acid (232 mg, 1.48 mmol, 1.5 equiv) was added followed by Pd(PPh<sub>3</sub>)<sub>4</sub> (114 mg, 0.1 mmol, 10 mol%). After 40 min, nosyl chloride (438 mg, 1.98 mmol, 2.0 equiv) was added, immediately followed by triethylamine (414  $\mu$ L, 2.97 mmol, 3 equiv). The resulting yellow solution was stirred for 15 min, before it was quenched by transferring the solution into a separation funnel filled with sat. aq. NaHCO<sub>3</sub> (50 mL), quantitating the transfer with additional CH<sub>2</sub>Cl<sub>2</sub>. Phases were separated and the aq. phase was extracted once with CH<sub>2</sub>Cl<sub>2</sub> (20 mL). The combined organic extracts were dried with MgSO<sub>4</sub>, filtered and concentrated. Flash chromatography on silica (A: heptane/CH<sub>2</sub>Cl<sub>2</sub> 8:2, B: EtOAc, 5% B to 40%) afforded ***rac*-FS12-3** (260 mg, 0.49 mmol, 50% yield) as yellow oil.

**<sup>1</sup>H NMR** (400 MHz, CDCl<sub>3</sub>)  $\delta$  = 7.94 (dd,  $J$  = 7.3, 2.1 Hz, 1H), 7.78 - 7.68 (m, 2H), 7.62 (dd,  $J$  = 7.2, 2.1 Hz, 1H), 3.87 (dd,  $J$  = 12.8, 1.8 Hz, 1H), 3.80 (dtd,  $J$  = 8.9, 4.9, 2.5 Hz, 1H), 3.63 (s, 3H), 3.35 (d,  $J$  = 12.9 Hz, 1H), 3.22 (td,  $J$  = 11.3, 5.1 Hz, 1H), 2.62 (ddd,  $J$  = 16.3, 10.8, 7.2 Hz, 1H), 2.46 (dt,  $J$  = 16.3, 4.7 Hz, 1H), 2.24 (t,  $J$  = 7.5 Hz, 2H), 2.10 - 1.98 (m, 1H), 1.54 (p,  $J$  = 7.3 Hz, 2H), 1.47 - 1.34 (m, 1H), 1.31 - 1.16 (m, 4H), 0.97 (t,  $J$  = 7.9 Hz, 9H), 0.79 - 0.68 (m, 6H). **<sup>13</sup>C NMR** (101 MHz, CDCl<sub>3</sub>)  $\delta$  = 208.7, 174.2, 148.8, 134.2, 131.7, 131.2, 130.5, 124.3, 51.5, 50.3, 49.7, 44.5, 39.8, 34.0, 32.7, 29.9, 25.2, 24.7, 8.0, 2.7. **HRMS** (ESI+) *req.* for C<sub>24</sub>H<sub>38</sub>N<sub>2</sub>O<sub>7</sub>SSi [M+H]<sup>+</sup> 527.2242, found 527.2274.

## Synthesis of *rac*-FS12-4

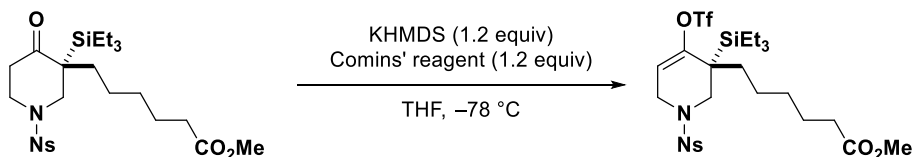

***rac*-FS12-3** (83 mg, 0.16 mmol, 1.0 equiv) was dissolved in THF (1.5 mL) and cooled to -78 °C. A solution of KHMDS in THF (1 M, 0.19 mL, 0.19 mmol, 1.2 equiv) was added dropwise. 10 min after completion of the addition, a solution of Comins' reagent in THF (1 M, 0.19 mL, 0.19 mmol) was added dropwise. After 10 min, the reaction was quenched by the addition of sat. aq. NH<sub>4</sub>Cl (10 mL). Extraction with EtOAc (3x 15 mL). The combined organic extracts were washed with brine, dried with MgSO<sub>4</sub>, filtered and concentrated. Flash chromatography on silica (20% EtOAc in heptane to 45%) afforded product contaminated with baseline material. A second chromatography on silica (solvent A: heptane/CH<sub>2</sub>Cl<sub>2</sub> (8:2), solvent B: EtOAc, 5% B to 25%) afforded ***rac*-FS12-4** (40 mg, 0.061 mmol, 39% yield) as colorless oil.

**<sup>1</sup>H NMR** (400 MHz, CDCl<sub>3</sub>)  $\delta$  = 7.95 (dd,  $J$  = 7.2, 2.0 Hz, 1H), 7.79 - 7.69 (m, 2H), 7.63 (dd,  $J$  = 7.3, 2.0 Hz, 1H), 5.71 (dd,  $J$  = 4.6, 2.7 Hz, 1H), 4.07 (dd,  $J$  = 15.9, 4.6 Hz, 1H), 3.72 - 3.61 (m, 2H), 3.66 (s, 3H), 3.27 (d,  $J$  = 12.7 Hz, 1H), 2.29 (t,  $J$  = 7.5 Hz, 2H), 1.74 - 1.56 (m, 4H), 1.50 - 1.34 (m, 2H), 1.34 - 1.21 (m, 2H), 1.01 (t,  $J$  = 8.0 Hz, 9H), 0.77 - 0.69 (m, 6H). **<sup>13</sup>C NMR** (101 MHz, CDCl<sub>3</sub>)  $\delta$  = 174.3, 153.5, 148.9, 134.3, 131.7, 131.3, 130.3, 124.4, 118.4 (q,  $J$  = 319.7 Hz), 108.6, 51.6, 50.3, 43.9, 35.9, 34.1, 32.8, 29.9, 24.8, 8.0, 2.9. **<sup>19</sup>F NMR** (376 MHz, CDCl<sub>3</sub>)  $\delta$  = -74.6. **HRMS** (ESI+) *req.* for C<sub>25</sub>H<sub>38</sub>F<sub>3</sub>N<sub>2</sub>O<sub>9</sub>S<sub>2</sub>Si [M+H]<sup>+</sup> 659.1735, found 659.1595.

## Synthesis of *rac*-FS12-5

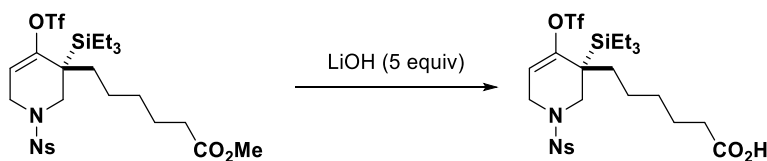

***rac*-FS12-4** (10 mg, 0.015 mmol, 1.0 equiv) was dissolved in a mixture of MeOH (0.25 mL) and THF (0.10 mL). A solution of lithium hydroxide monohydrate in water (1 M) (0.076 mL, 0.076 mmol, 5.0 equiv) was added and the resulting mixture was stirred at room temperature for 90 min. Following dilution with EtOAc (50 mL), the mixture was washed with dilute aq. HCl (1 M, 10 mL) and brine (10 mL), dried with MgSO<sub>4</sub>, filtered and concentrated. Flash chromatography on silica (non-automated, pipette column, heptane:CH<sub>2</sub>Cl<sub>2</sub>:EtOAc 5.5:2:2.5) afforded contaminated material. A second flash chromatography on silica (non-automated, pipette column, heptane:CH<sub>2</sub>Cl<sub>2</sub>:EtOAc 5.5:2.5:2 + 0.1% AcOH) afforded ***rac*-FS12-5** as colorless oil (1.7 mg, 0.00264 mmol, 17% yield).

**<sup>1</sup>H NMR** (400 MHz, CDCl<sub>3</sub>)  $\delta$  = 7.95 (dd,  $J$  = 7.2, 2.0 Hz, 1H), 7.82 - 7.67 (m, 2H), 7.63 (dd,  $J$  = 7.3, 2.0 Hz, 1H), 5.71 (dd,  $J$  = 4.6, 2.7 Hz, 1H), 4.08 (dd,  $J$  = 15.6, 4.9 Hz, 1H), 3.70 (d,  $J$  = 12.7 Hz, 1H), 3.64 (dd,  $J$  = 16.1, 2.8 Hz, 1H), 3.27 (d,  $J$  = 12.8 Hz, 1H), 2.34 (t,  $J$  = 7.5 Hz, 2H), 1.71 - 1.58 (m, 4H), 1.49 - 1.36 (m, 2H), 1.35 - 1.25 (m, 2H), 1.01 (t,  $J$  = 8.0 Hz, 9H), 0.78 - 0.69 (m, 6H). **<sup>13</sup>C NMR** (101 MHz, CDCl<sub>3</sub>)  $\delta$  = 177.2, 153.5, 148.9, 134.3, 131.7, 131.3, 130.3, 124.4, 108.7, 50.3, 43.9, 35.9, 33.5, 32.8, 29.8, 24.8, 24.5, 8.0, 2.8. **<sup>19</sup>F NMR** (376 MHz, CDCl<sub>3</sub>)  $\delta$  = -74.6. **HRMS** (ESI+) req. for C<sub>24</sub>H<sub>36</sub>F<sub>3</sub>N<sub>2</sub>O<sub>9</sub>S<sub>2</sub>Si [M+H]<sup>+</sup> 645.1578, found 645.1636.

## Synthesis of **11**

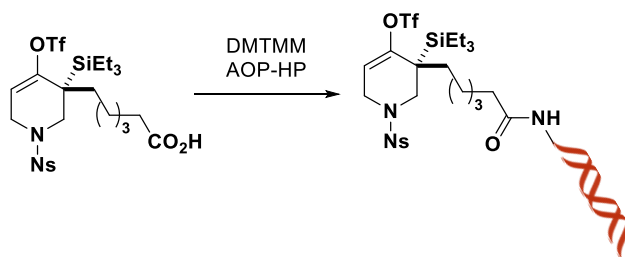

AOP-HP (2 mM in phosphate buffer pH8.0, 250  $\mu$ L, 0.5  $\mu$ mol) was combined with a solution of ***rac*-FS12-5** in DMF (10 mM, 300  $\mu$ L, 3.00  $\mu$ mol, 6 equiv). A solution of DMTMM in water (200 mM, 4.4  $\mu$ L, 1.75  $\mu$ mol, 3.5 equiv) was added. The mixture was briefly vortexed, spun down and incubated at room temperature for 3 h. UPLC-MS analysis indicated substantial amounts of residual AOP-HP. Another portion of DMTMM (4.5  $\mu$ L, 1.8  $\mu$ mol, 3.6 equiv) was added. The mixture was vortexed and incubated at for 4 h at room temperature. To remove potential DMT-adduct, 10% aq. piperidine (0.6 mL) was added. After 2 min, DNA was precipitated by the addition of aq. NaCl (5 M, 120  $\mu$ L) and EtOH (4 mL). The cloudy mixture was vortexed and incubated on dry ice for 15 min. After centrifugation (3700 RCF, 5 min), the supernatant was decanted. The pellet was washed with additional EtOH (1 mL). The residue was dissolved in water (0.5 mL) and subjected to preparative HPLC (microprep-HPLC, 10-70% method, collecting into vials precharged with 100 mM phosphate buffer pH7). Fractions containing product were pooled and concentrated by ultrafiltration at 5  $^{\circ}$ C (Amicon<sup>®</sup> Ultra-4, 3000 Da nominal molecular weight limit, part #UFC800308 as per manufacturer's instruction). Upon completion, water (3.5 mL) was added and the filtration step was repeated to afford **11** as an aqueous solution, which was transferred to an Eppendorf tube. DNA concentration was determined photospectrometrically (Nanodrop One): 3.001 g/L (0.6 mM, calculated with MW = 5000 Da, volume by pipette: V = 200  $\mu$ L, 120 nmol, 24% yield). The material (20  $\mu$ L aliquots) was kept at -20  $^{\circ}$ C.

**MS** (ESI-) expected 5808 Da, found 5811 Da.

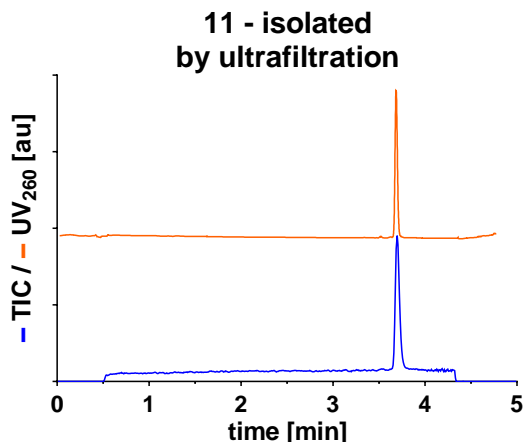

**Note:** Concentration of HPLC fractions by lyophilization would result in formation of impurities, amounting to 16% AUC in the example shown below ( $m/z$  of new species 5648-5650 Da).

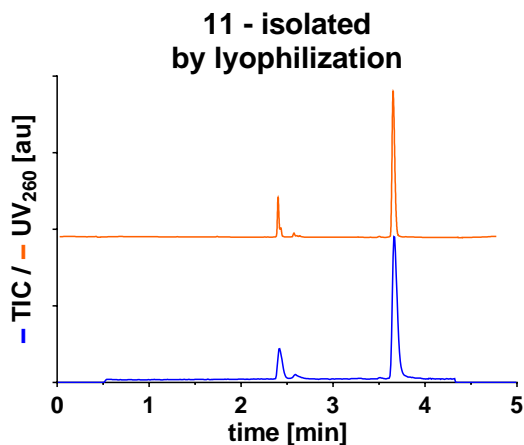

## e. Synthesis of 1,3-dipoles

### Synthesis of *N*-methyl-1-(1-methyl-1H-imidazol-2-yl)methanimine oxide

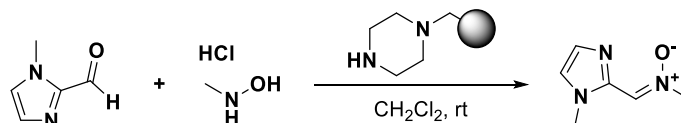

*N*-methylhydroxylamine hydrochloride (36 mg, 0.43 mmol, 1.0 equiv) was combined with 1-methyl-2-imidazolecarboxaldehyde (53 mg, 0.48 mmol, 1.1 equiv).  $\text{CH}_2\text{Cl}_2$  (2.4 mL) and resin-bound piperazine (MP-piperazine from SupraSciences, loading 3 mmol/g, 160 mg) was added. The mixture was stirred overnight, filtered and concentrated. Flash chromatography on silica (5–25% MeOH in  $\text{CH}_2\text{Cl}_2$ , 0.1%  $\text{NEt}_3$ ) afforded the product contaminated with triethylammonium hydrochloride. The material was partitioned between sat. aq. sodium bicarbonate and  $\text{CH}_2\text{Cl}_2$ . The phases were separated and the aq. phase was extracted with  $\text{CH}_2\text{Cl}_2:\text{CF}_3\text{CH}_2\text{OH}$  (4:1). The combined organic extracts were dried with  $\text{MgSO}_4$ , filtered and concentrated to afford the title compound (26 mg, 0.19 mmol, 43% yield) as a mixture of geometric isomers (ratio ca. 4:1).

Major isomer:  $^1\text{H NMR}$  (400 MHz,  $d_6$ -DMSO)  $\delta$  = 7.90 (s, 1H), 7.26 (s, 1H), 7.04 (s, 1H), 3.79 (s, 3H), 3.70 (s, 3H).  $^{13}\text{C NMR}$  (101 MHz,  $d_6$ -DMSO)  $\delta$  = 138.9, 128.9, 125.2, 123.1, 53.3. Minor isomer:  $^1\text{H NMR}$  (400 MHz,  $d_6$ -DMSO)  $\delta$  = 7.85 (s, 1H), 7.31 (s, 1H), 7.11 (s, 1H), 4.10 (s, 3H), 3.69 (s, 3H).  $^{13}\text{C NMR}$  (101 MHz,  $d_6$ -DMSO)  $\delta$  = 138.6, 129.0, 124.2, 123.5, 50.3, 32.6.

### Synthesis of 5-oxo-2-(pyridazin-4-ylmethylene)pyrazolidin-2-ium-1-ide

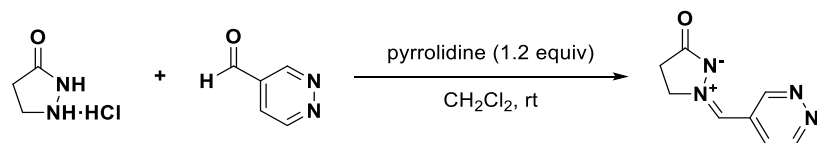

According to a literature procedure,<sup>[6]</sup> 3-pyrazolidinone hydrochloride (22 mg, 0.18 mmol, 1.0 equiv) was combined with pyridazine-4-carbaldehyde (20 mg, 0.19 mmol, 1.05 equiv) and a solution of pyrrolidine in  $\text{CH}_2\text{Cl}_2$  (0.24 M, 920  $\mu\text{L}$ , ca. 1.2 equiv) was added. The cloudy mixture was centrifuged and the supernatant was removed. The pellet was washed with methanol (1 mL) and dried under high vacuum to afford the title compound as light-yellow solid (8 mg, 0.045 mmol, 25% yield) as a mixture of geometric isomers (ratio ca. 10:1).

$^1\text{H NMR}$  (400 MHz,  $d_6$ -DMSO)  $\delta$  = 9.64 (t,  $J$  = 1.9 Hz, 1H), 9.41 (dd,  $J$  = 5.4, 1.3 Hz, 1H), 8.56 (dd,  $J$  = 5.6, 2.3 Hz, 1H), 7.69 (d,  $J$  = 1.9 Hz, 1H), 4.74 – 4.62 (m, 2H), 3.32 (s, 4H), 2.71 – 2.59 (m, 2H).  $^{13}\text{C NMR}$  (101 MHz,  $d_6$ -DMSO)  $\delta$  = 186.3, 153.1, 151.0, 128.5, 126.2, 125.5, 59.7, 29.8.

### Synthesis of *N*-cyclohexyl-2-ethylbutan-1-imine oxide

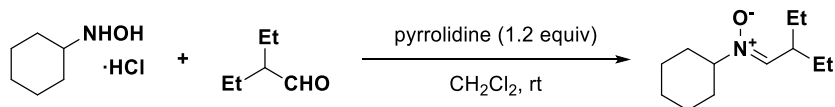

According to a literature procedure,<sup>[6]</sup> *N*-cyclohexylhydroxylamine hydrochloride (100 mg, 0.66 mmol, 1.0 equiv) and 2-ethylbutanal (66 mg, 0.66 mmol, 1.0 equiv) were combined with  $\text{CH}_2\text{Cl}_2$  (3.3 mL). Pyrrolidine (65  $\mu\text{L}$ , 0.79 mmol, 1.2 equiv) was added and the resulting light yellow solution was stirred for 5 min at room temperature, before it was loaded onto a silica column preequilibrated with  $\text{CH}_2\text{Cl}_2$ . Elution (50% EtOAc in heptane to 100%), pooling of fractions containing a UV active species ( $R_f(\text{EtOAc})$  = 0.24) and concentration afforded the title compound (114 mg, 0.58 mmol, 88% yield) as colorless solid.

$^1\text{H NMR}$  (400 MHz,  $d_6$ -DMSO)  $\delta$  = 6.80 (d,  $J$  = 7.7 Hz, 1H), 3.83 – 3.72 (m, 1H), 2.71 (qt,  $J$  = 7.9, 5.5 Hz, 1H), 1.74 (ddt,  $J$  = 10.0, 7.2, 3.8 Hz, 6H), 1.59 (dt,  $J$  = 13.3, 3.6 Hz, 1H), 1.45 (dq,  $J$  = 13.5, 7.7, 5.8 Hz, 2H), 1.39 – 1.20 (m, 4H), 1.10 (qt,  $J$  = 13.0, 3.3 Hz, 1H), 0.81 (t,  $J$  = 7.5 Hz, 6H).  $^{13}\text{C NMR}$  (101 MHz,  $d_6$ -DMSO)  $\delta$  = 138.8, 72.2, 38.1, 30.7, 24.7, 24.4, 24.0, 11.5.

### Synthesis of *N*-cyclohexyl-1-(pyridin-2-yl)methanimine oxide

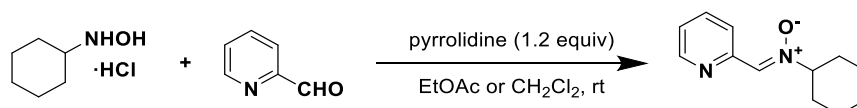

According to a literature procedure,<sup>[6]</sup> *N*-cyclohexylhydroxylamine hydrochloride (152 mg, 1.0 mmol, 1.0 equiv) was suspended in CH<sub>2</sub>Cl<sub>2</sub> (3 mL) and 2-pyridinecarboxaldehyde (96  $\mu$ L, 1.0 mmol, 1.0 equiv) was added. Pyrrolidine (99  $\mu$ L, 1.2 mmol, 1.2 equiv) was added (exotherm) and the resulting mixture was stirred at room temperature for 10 min. The solution was directly loaded onto a silica column (glass pipette). Material was eluted with EtOAc (2 mL fractions). Fractions 1-4 were pooled and concentrated to afford the title compound (202 mg, 0.99 mmol, 99% yield) as colorless solid.

<sup>1</sup>H NMR (400 MHz, CDCl<sub>3</sub>)  $\delta$  = 9.15 (d,  $J$  = 8.3 Hz, 1H), 8.62 (dd,  $J$  = 4.8, 2.0 Hz, 1H), 7.80 – 7.73 (m, 2H), 7.29 – 7.23 (m, 1H), 3.90 (tt,  $J$  = 11.5, 3.8 Hz, 1H), 2.17 – 2.07 (m, 2H), 2.01 – 1.88 (m, 4H), 1.75 – 1.67 (m, 1H), 1.39 (qt,  $J$  = 13.2, 3.4 Hz, 2H), 1.30 (s, 1H). <sup>13</sup>C NMR (101 MHz, CDCl<sub>3</sub>)  $\delta$  = 150.0, 149.6, 136.9, 133.8, 124.2, 123.9, 76.3, 31.3, 25.2, 25.1. HRMS (ESI+) req. for C<sub>12</sub>H<sub>17</sub>N<sub>2</sub>O [M+H]<sup>+</sup> 215.1335, found 205.1351.

### Synthesis of *N*-cyclohexyl-1-(thiazol-2-yl)ethan-1-imine oxide

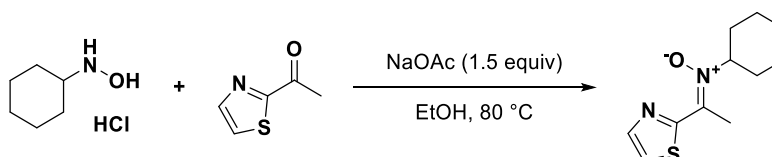

*N*-cyclohexylhydroxylamine hydrochloride (114 mg, 0.75 mmol, 1.5 equiv) and sodium acetate (62 mg, 0.75 mmol, 1.5 equiv) were combined with a solution of 2-acetylthiazole in ethanol (0.2 M, 0.25 mL, 0.5 mmol, 1.0 equiv). The mixture was stirred at 80 °C for 38 h. After cooling to room temperature, the mixture was filtered (syringe filter, PTFE, 0.2  $\mu$ m) and concentrated. Flash chromatography on silica (0% EtOAc in heptane to 30%) afforded the title compound (31 mg, 0.14 mmol, 28% yield) as colorless oil. The *Z* geometry was established in a NOESY experiment, showing strong correlation between the CH and CH<sub>3</sub> groups.

<sup>1</sup>H NMR (400 MHz, CDCl<sub>3</sub>)  $\delta$  = 8.02 (d,  $J$  = 3.2 Hz, 1H), 7.42 (d,  $J$  = 3.1 Hz, 1H), 4.34 (tt,  $J$  = 11.3, 3.7 Hz, 1H), 2.78 (s, 3H), 2.15 - 2.02 (m, 2H), 1.98 - 1.85 (m, 4H), 1.76 - 1.67 (m, 1H), 1.45 - 1.30 (m, 2H), 1.30 - 1.20 (m, 1H). <sup>13</sup>C NMR (101 MHz, CDCl<sub>3</sub>)  $\delta$  = 158.1, 143.1, 136.9, 121.5, 67.7, 30.1, 25.1, 25.1, 15.1. LRMS (ESI+) req. for C<sub>11</sub>H<sub>17</sub>N<sub>2</sub>OS [M+H]<sup>+</sup> 225.1, found 224.9.

## f. Two-step diversification of 11

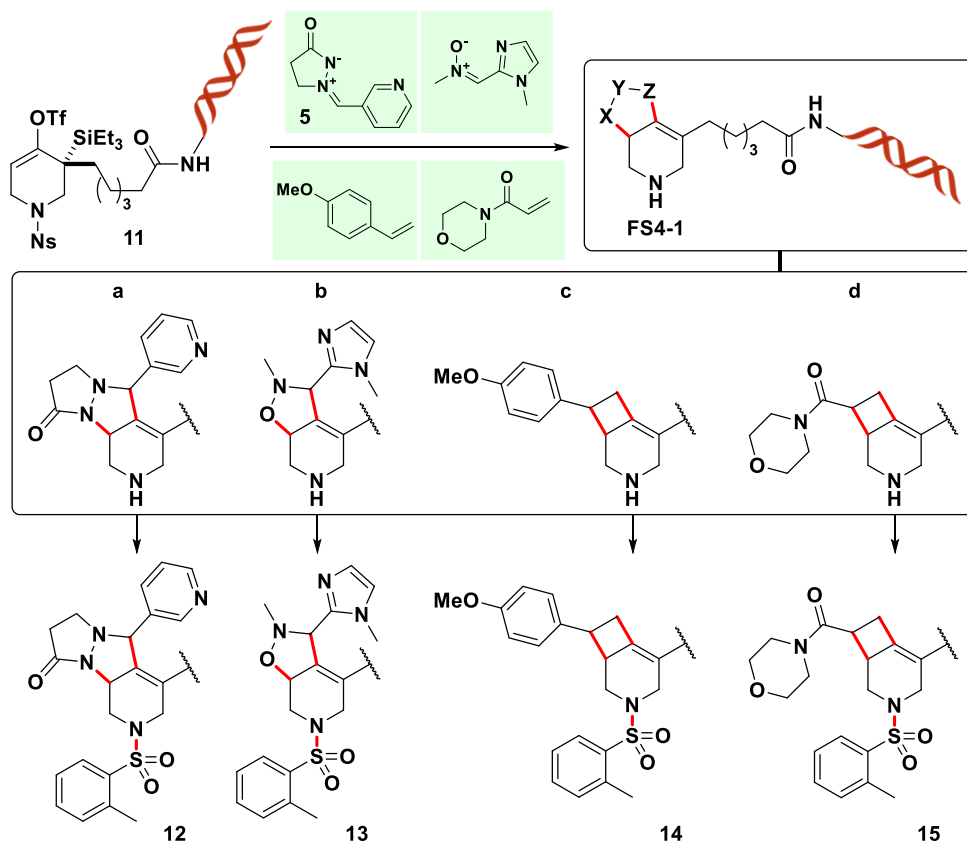

Step1: In four individual polypropylene tubes (Eppendorf), **11** (0.5 mM in water, 10  $\mu$ L, 5 nmol) was combined with a solution of the corresponding cycloaddition partner (azomethine imine **5**, *N*-methyl-1-(1-methyl-1H-imidazol-2-yl)methanimine oxide (see above), 4-methoxystyrene, 4-acryloylmorpholine) in DMSO (200 mM, 11  $\mu$ L, 2.2  $\mu$ mol, 440 equiv). DMSO (66  $\mu$ L) was added to adjust the final concentration of building blocks to 25 mM. The mixture was vortexed and spun down, before a solution of cesium fluoride (2 M in 100 mM bicarbonate buffer pH10, 1  $\mu$ L, ca. 22 mM final concentration) was added. The solution was vortexed again and incubated at room temperature for 1 h. Bicarbonate buffer (100 mM, pH10, 50  $\mu$ L) and 4-methoxythiophenol in DMSO (1250 mM, 10  $\mu$ L) were added. The solution was vortexed, spun down and incubated at 80  $^{\circ}$ C for 70 min. DNA was then precipitated according to **GP2** to afford intermediate piperidines **FS8-1a-d** (also see **Figure S8**). Pellets were dissolved in water (10  $\mu$ L) and DNA content was quantified photospectrometrically (Nanodrop One, calculated with MW = 5000 g/mol). Product display (%AUC) was determined by UPLC-MS (see **Figure S8**).

**FS8-1a**: >95%AUC (2.085 g/L, 0.42 mM, 4.2 nmol, 84% recovered DNA)

**FS8-1b**: 95%AUC (1.655 g/L, 0.33 mM, 3.3 nmol, 66% recovered DNA)

**FS8-1c**: 91%AUC (1.943 g/L, 0.39 mM, 3.9 nmol, 78% recovered DNA)

**FS8-1d**: 92%AUC (1.923 g/L, 0.38 mM, 3.8 nmol, 76% recovered DNA)

Step 2: In four individual wells (96-well polypropylene plate), solutions of **FS8-1a-d** (1  $\mu$ L of on-DNA piperidines, 0.3–0.4 nmol) were combined with phosphate buffer (100 mM, pH8, 3  $\mu$ L) and a solution of 2-methylbenzenesulfonyl chloride in acetonitrile (200 mM, 1  $\mu$ L, 40 mM final concentration). The plate was sealed, vortexed, spun down and incubated overnight at room temperature. DNA was then precipitated according to **GP1** to afford final DNA-conjugates **12-15**. Pellets were dissolved in water (25  $\mu$ L) and product display (%AUC) was determined by UPLC-MS (see **Figure 4, B**).

**12:** 96%AUC (MS req. m/z 5688 Da, found 5689 Da)  
**13:** 92%AUC (MS req. m/z 5652 Da, found 5653 Da)  
**14:** 79%AUC (MS req. m/z 5647 Da, found 5649 Da)  
**15:** 88%AUC (MS req. m/z 5654 Da, found 5655 Da)

## g. Preliminary results towards a pilot library

Fmoc-protected allene precursor (**FS13-3**) was synthesized and conjugated to DNA (AOP-HP) as depicted in Figure S13. The DNA-conjugate (**FS13-4**) allows for mild deprotection following strain-promoted cycloadditions. In preliminary studies with this substrate, the protecting group was partially or fully removed due to the basic conditions of the transformation (cesium fluoride). We found it convenient to add aq. piperidine at the end of the strain-promoted cycloaddition reaction to ensure quantitative Fmoc removal.

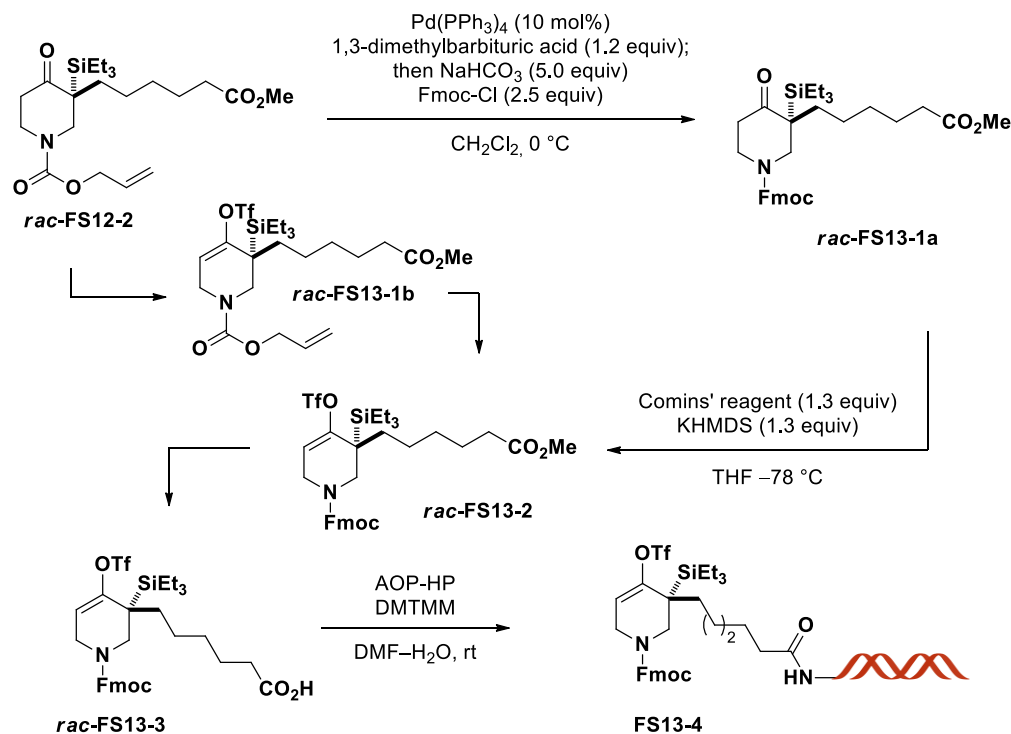

**Figure S13** Synthetic route towards Fmoc-protected on-DNA strained allene precursor **FS13-4**.

### Synthesis of *rac*-FS13-1a

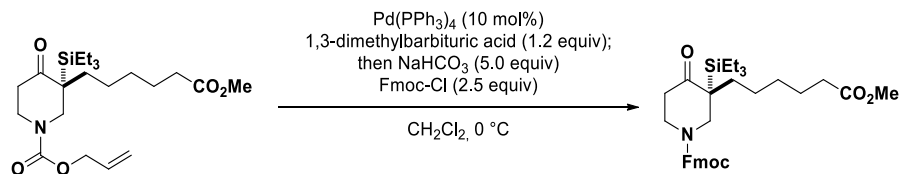

**rac-FS12-2** (208 mg, 0.49 mmol, 1.0 equiv) was dissolved in  $\text{CH}_2\text{Cl}_2$  (0.7 mL) and the resulting solution was cooled to  $0^\circ\text{C}$ . A solution of 1,3-dimethylbarbituric acid (92 mg, 0.59 mmol, 1.2 equiv) and  $\text{Pd(PPh}_3)_4$  (57 mg, 0.05 mmol, 0.1 equiv) in  $\text{CH}_2\text{Cl}_2$  (0.7 mL) was added. The reaction mixture was stirred for 5 min before sodium bicarbonate (205 mg, 2.44 mmol, 5.0 equiv) was added, followed by Fmoc-Cl (316 mg, 1.22 mmol, 2.5 equiv). The suspension was stirred at  $0^\circ\text{C}$  for 15 min. The reaction mixture was partitioned between a saturated aqueous solution of  $\text{NaHCO}_3$  and  $\text{CH}_2\text{Cl}_2$ . The phases were separated and the organic

layer was washed with brine, dried over  $\text{MgSO}_4$ , filtered and concentrated. Flash chromatography on silica (0% EtOAc in heptane to 30%) afforded **rac-FS13-1a** (229 mg, 0.41 mmol, 83% yield) as colorless oil.

**$^1\text{H}$  NMR** (400 MHz, *d*8-PhMe, 80 °C)  $\delta$  = 7.61 – 7.54 (m, 2H), 7.49 – 7.42 (m, 2H), 7.25 – 7.19 (m, 2H), 7.19 – 7.14 (m, 2H), 4.54 – 4.42 (m, 2H), 4.02 (t,  $J$  = 5.9 Hz, 1H), 3.68 – 3.45 (m, 3H), 3.38 (s, 3H), 3.18 (ddd,  $J$  = 12.6, 10.5, 5.6 Hz, 1H), 2.19 (ddd,  $J$  = 15.3, 10.6, 7.2 Hz, 1H), 2.12 – 1.92 (m, 3H), 1.51 (p,  $J$  = 7.4 Hz, 2H), 1.40 – 1.29 (m, 1H), 1.29 – 1.07 (m, 5H), 0.92 (t,  $J$  = 7.9 Hz, 9H), 0.68 – 0.50 (m,  $J$  = 7.4 Hz, 6H).  **$^{13}\text{C}$  NMR** (101 MHz, *d*8-PhMe, 80 °C, 2 rotamers)  $\delta$  = 209.8, 173.3, 155.5, 145.2, 145.1, 142.3, 128.2, 127.6(3), 127.6(1), 125.4, 125.3, 120.5, 67.6, 51.0, 50.4, 48.5, 47.1, 42.5, 40.0, 34.4, 34.3, 30.6, 25.9, 25.3, 8.3, 3.3. **HRMS** (ESI+) req. for  $\text{C}_{33}\text{H}_{46}\text{NO}_5\text{Si}$   $[\text{M}+\text{H}]^+$  563.3067, found 564.3177; req. for  $\text{C}_{33}\text{H}_{45}\text{NNaO}_5\text{Si}$   $[\text{M}+\text{Na}]^+$  586.2965, found 586.2988.

### Synthesis of **rac-FS13-1b**

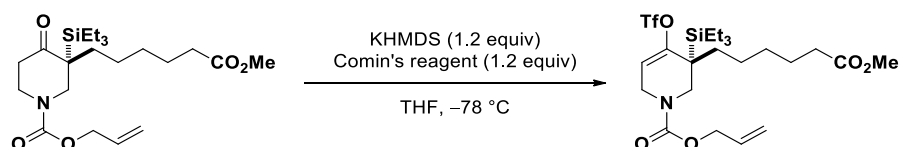

**rac-FS12-2** (327 mg, 0.77 mmol, 1.0 equiv) was dissolved in THF (3 mL) and cooled to  $-78$  °C. A solution of KHMDS in 2-methyltetrahydrofuran (1.0 M, 0.92 mL, 0.92 mmol, 1.2 equiv) was added dropwise over 5 min and the resulting yellow solution was stirred for another 15 min. A solution of Comins' reagent in THF (1 M, 0.92 mL, 0.92 mmol, 1.2 equiv) was added dropwise over 5 min and the resulting solution was stirred for another 15 min. The reaction was quenched by pouring it into a separation funnel preloaded with a saturated aqueous solution of  $\text{NH}_4\text{Cl}$  (100 mL). The organic material was extracted with  $\text{CH}_2\text{Cl}_2$  (3 x 25 mL). The combined organic extracts were washed with brine, dried with  $\text{MgSO}_4$ , filtered and concentrated. Flash chromatography on silica (0% EtOAc in heptane to 25%) afforded **rac-FS13-1b** (322 mg, 0.58 mmol, 75% yield) as colorless oil.

**$^1\text{H}$  NMR** (400 MHz,  $\text{CDCl}_3$ )  $\delta$  = 5.92 (ddt,  $J$  = 16.3, 10.7, 5.6 Hz, 1H), 5.68 (s, 1H), 5.26 (dd,  $J$  = 29.6, 13.9 Hz, 2H), 4.60 (d,  $J$  = 5.5 Hz, 2H), 4.27 (dd,  $J$  = 18.0, 4.3 Hz, 1H), 3.95 – 3.73 (m, 2H), 3.65 (s, 3H), 3.49 – 3.30 (m, 1H), 2.27 (t,  $J$  = 7.6 Hz, 2H), 1.58 (qd,  $J$  = 7.7, 4.1 Hz, 4H), 1.35 – 1.21 (m, 4H), 0.99 (t,  $J$  = 7.9 Hz, 9H), 0.73 – 0.62 (m, 6H).  **$^{13}\text{C}$  NMR** (101 MHz,  $\text{CDCl}_3$ )  $\delta$  = 174.2, 154.9, 153.3, 153.0, 132.9, 118.4 (q,  $J$  = 319.5 Hz), 118.3, 117.9, 110.4, 110.2, 66.5, 51.5, 47.4, 42.4, 42.1, 35.4, 34.1, 32.7, 29.9, 24.8, 24.6, 24.4, 8.0, 2.8.

### Synthesis of **rac-FS13-2** (from **rac-FS13-1a**)

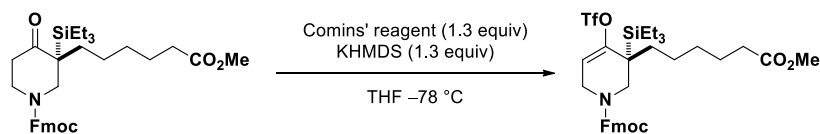

**rac-FS13-1a** (30 mg, 0.05 mmol, 1.0 equiv) was dissolved in THF (0.5 mL) and the resulting solution was cooled to  $-78$  °C. A solution of KHMDS (1 M in THF, 0.07 mL, 0.07 mmol, 1.3 equiv) was added over 1 min. After the addition, the reaction mixture was stirred at  $-78$  °C for 5 min. A solution of Comins' reagent (25 mg, 0.06 mmol, 1.3 equiv) in THF (0.5 mL) was added and the reaction mixture was stirred at  $-78$  °C for 1 h. A saturated aqueous solution of  $\text{NH}_4\text{Cl}$  was added and the mixture was extracted with EtOAc. The organic extracts were combined, washed with brine, dried over  $\text{MgSO}_4$ , filtered and concentrated. Flash chromatography on silica (0% EtOAc in heptane to 10%) afforded **rac-FS13-2** (10 mg, 0.01 mmol, 27% yield) as colorless oil.

**$^1\text{H}$  NMR** (400 MHz, *d*8-PhMe, 80 °C)  $\delta$  7.58 (d,  $J$  = 7.4 Hz, 2H), 7.42 (d,  $J$  = 7.2 Hz, 2H), 7.26 – 7.14 (m, 4H), 5.44 (dd,  $J$  = 4.1, 2.9 Hz, 1H), 4.52 (dd,  $J$  = 10.8, 5.8 Hz, 1H), 4.42 (dd,  $J$  = 10.8, 5.9 Hz, 1H), 3.99 (t,

$J = 5.9$  Hz, 1H), 3.88 (dd,  $J = 18.2, 4.1$  Hz, 1H), 3.58 (d,  $J = 13.5$  Hz, 1H), 3.43 – 3.32 (m, 4H), 3.22 – 3.01 (m, 1H), 2.10 (t,  $J = 7.3$  Hz, 2H), 1.69 – 1.40 (m, 4H), 1.40 – 1.13 (m, 4H), 0.94 (t,  $J = 7.9$  Hz, 9H), 0.62 (q,  $J = 7.9$  Hz, 6H).  $^{13}\text{C}$  NMR (101 MHz, *d*8-PhMe, 80 °C)  $\delta = 173.3, 155.1, 153.9, 145.0, 142.3, 128.2, 127.7, 127.6, 125.4, 125.3, 120.6, 119.6$  (q,  $J = 320.0$  Hz), 110.9, 67.7, 51.0, 48.4, 48.2, 42.7, 36.3, 34.3, 33.4, 30.5, 25.4, 25.0, 8.2, 3.5. HRMS (ESI+) req. for  $\text{C}_{34}\text{H}_{45}\text{F}_3\text{NO}_7\text{SSi}$   $[\text{M}+\text{H}]^+$  696.2633, found 696.2692.

### Synthesis of *rac*-FS13-2 (from *rac*-FS13-1b)

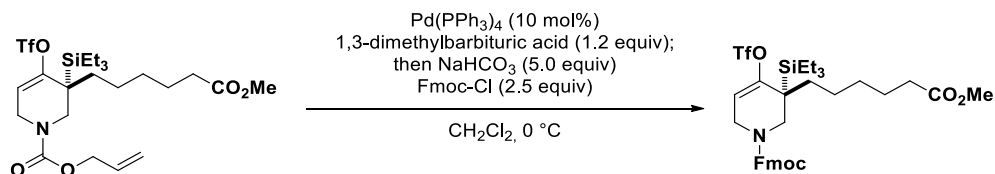

***rac*-FS13-1b** (200 mg, 0.36 mmol, 1.0 equiv) was dissolved in  $\text{CH}_2\text{Cl}_2$  (0.9 mL) and cooled to 0 °C. A solution of  $\text{Pd}(\text{PPh}_3)_4$  (41 mg, 0.04 mmol, 0.1 equiv) and 1,3-dimethylbarbituric acid (67 mg, 0.43 mmol, 1.2 equiv) in  $\text{CH}_2\text{Cl}_2$  (0.9 mL) was then added and the resulting mixture was stirred for 3 min, before Fmoc-Cl (232 mg, 0.90 mmol, 2.5 equiv) and sodium bicarbonate (151 mg, 1.79 mmol, 5.0 equiv) were added. The heterogeneous mixture was stirred for 20 min, then loaded directly onto a silica column (through a syringe filter, 0.2  $\mu\text{m}$ ), eluting with 0% EtOAc in heptane to 30%. Once the product was off the column (checked by TLC), the column was flushed with 10% MeOH in  $\text{CH}_2\text{Cl}_2$ . The flushing was combined with excess sodium bicarbonate and Fmoc-Cl, and stirred overnight. The mixture was filtered and concentrated. Flash chromatography on silica (0% EtOAc in heptane to 30%) afforded contaminated material, which was pooled with material containing the same contaminant from the first column. Another flash chromatography on silica (A: heptane: $\text{CH}_2\text{Cl}_2$  9:1, B: EtOAc, 0% B to 20%) afforded still contaminated material. Another flash chromatography on silica (A: heptane: $\text{CH}_2\text{Cl}_2$  1:1, B: heptane: $\text{CH}_2\text{Cl}_2$ :EtOAc 1:1:0.05, 0% B to 100%) afforded ***rac*-FS13-2** (164 mg, 0.24 mmol, 66% yield). *Note:* the impurity, although more polar on TLC, eluted first under these conditions.

### Synthesis of *rac*-FS13-3

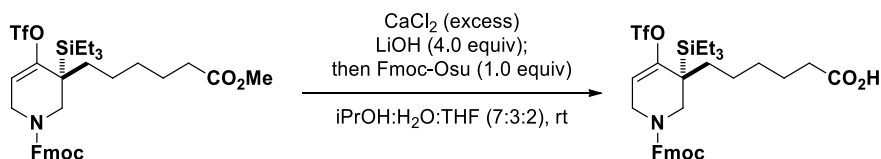

***rac*-FS13-2** (120 mg, 0.17 mmol, 1.0 equiv) was dissolved in a freshly prepared solution of  $\text{CaCl}_2$  (0.8 M in  $\text{iPrOH}$ :water, 7:3 v/v, 2.5 mL). THF (0.5 mL) was added, followed by LiOH (17 mg, 0.69 mmol, 4 equiv) and the resulting reaction mixture was stirred at room temperature for 2 d. UPLC-MS analysis showed that a fraction of the material was deprotected. Fmoc-Osu (58 mg, 0.17 mmol, 1.0 equiv) was added and the biphasic mixture was stirred at room temperature for 1 h. Water and a few drops of 5 M aqueous HCl were added. The suspension was extracted 3 times with EtOAc. The organic layers were combined, washed with brine, dried over  $\text{MgSO}_4$ , filtered and concentrated. Flash chromatography on silica (0% EtOAc in heptane to 30%, +0.1% AcOH) afforded ***rac*-FS13-3** (34 mg, 0.05 mmol, 29% yield) as a colorless solid.

$^1\text{H}$  NMR (400 MHz,  $\text{CDCl}_3$ )  $\delta = 7.77$  (d,  $J = 7.6$  Hz, 2H), 7.56 (d,  $J = 7.4$  Hz, 2H), 7.40 (t,  $J = 7.4$  Hz, 2H), 7.32 (t,  $J = 7.4$  Hz, 2H), 5.73 – 5.61 (m, 1H), 4.73 – 4.35 (m, 2H), 4.35 – 4.12 (m, 2H), 3.94 – 3.77 (m, 1H), 3.71 – 2.92 (m, 2H), 2.29 (t,  $J = 7.6$  Hz, 2H), 1.75 – 1.42 (m, 4H), 1.37 – 1.10 (m, 4H), 1.02 – 0.91 (m, 9H), 0.78 – 0.49 (m, 6H).  $^{13}\text{C}$  HSQC ( $\text{CDCl}_3$ )  $\delta = 127.8, 127.2, 124.6, 120.1, 110.1, 65.7, 47.5, 47.4, 42.0, 33.8, 32.5, 29.5, 24.7, 7.8, 2.8$ . HRMS (ESI+) req. for  $\text{C}_{33}\text{H}_{43}\text{F}_3\text{NO}_7\text{SSi}$   $[\text{M}+\text{H}]^+$  682.2476, found 682.2518.

### Synthesis of FS13-4

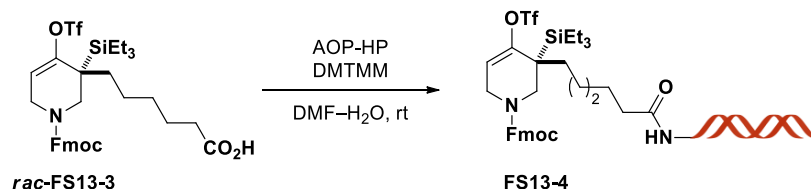

**FS13-4** was synthesized from **rac-FS13-3** as described for the preparation of **11** and isolated by preparative HPLC (74% yield by photospectrometry).

**rac-FS13-3** (17 mM in DMF, 353  $\mu\text{L}$ ) was combined with DNA-AOP-HP (2.5 mM in phosphate buffer pH8.0, 80  $\mu\text{L}$ , 200 nmol). DMTMM (400 mM in water, 10  $\mu\text{L}$ , 4  $\mu\text{mol}$ ) was added. The mixture was vortexed, spun down and incubated on a shaker (30  $^{\circ}\text{C}$ , 1000 rpm) for 2 h. After EtOH precipitation (5 M NaCl, 44  $\mu\text{L}$ , 1.4 mL EtOH, incubated on dry ice, removal of supernatant, pellet washed with 80% aq. EtOH (0.5 mL) and EtOH (0.5 mL), dried under vacuum) the pellet was transferred into an HPLC injection vial (3x 30  $\mu\text{L}$ ). Preparative HPLC (solvent A: triethylammonium acetate (50 mM) in water, B: MeOH, 5-95% B over 15 min, one injection) and concentration of the corresponding fractions by ultrafiltration (3k MW cutoff membrane) afforded **FS13-4** (6.316 g/L (photospectrometrically), 113  $\mu\text{L}$  (by pipette), ca. 1.3 mM (calculated with MW = 5000 g/mol), 143 nmol, 74%). The solution was aliquoted (20  $\mu\text{L}$  portions) and stored at -20  $^{\circ}\text{C}$ .

### On-DNA cycloaddition reactions

Work towards a pilot library is currently in ongoing. This following section provides additional data obtained for a larger set of reagents. Cycloadditions were performed using **FS13-4** (3 M in water, 1  $\mu\text{L}$ , 3 nmol) and commercially available building blocks as described above (90% aq. DMSO, 50 mM CsF, rt, 1 h). Usually, these conditions result in convenient loss of the protecting group. To ensure quantitative Fmoc-removal, reactions were treated with 10% aq. piperidine (1 volume) before ethanol-induced DNA-precipitation. Activated olefins and pyrroles were used as received and dissolved in DMSO (200 mM to give a final concentration of 180 mM). Dipoles were prepared in analogy to Figure S7 and used without purification (135 mM theoretical final concentration). The following table lists building blocks and dipoles that resulted in acceptable product formation (>75% AUC, corrected). Success rate: 56 out of 96 for commercial building blocks, 131 out of 384 for dipoles (preparation not optimized).

| BUILDING BLOCK                            | ALDEHYDE FOR DIPOLE FORMATION (WHERE APPLICABLE) |
|-------------------------------------------|--------------------------------------------------|
| DIETHYL VINYLPHOSPHONATE                  |                                                  |
| 3-VINYLANISOLE                            |                                                  |
| 2,5-DIMETHYLSTYRENE                       |                                                  |
| 2-BROMOSTYRENE                            |                                                  |
| 4-CHLOROSTYRENE                           |                                                  |
| METHYL-P-VINYLBENZOATE                    |                                                  |
| 4-VINYL-IMIDAZOLE                         |                                                  |
| 4-VINYLPHENOL                             |                                                  |
| 4-VINYLBENZYL ACETATE                     |                                                  |
| (4-VINYLBENZYL)TRIMETHYLAMMONIUM CHLORIDE |                                                  |
| N,N-DIMETHYL-4-VINYLBENZYLAMINE           |                                                  |
| 4-AMINOSTYRENE                            |                                                  |
| 3-NITROSTYRENE                            |                                                  |
| DIMETHYL VINYLPHOSPHONATE                 |                                                  |
| 4-CYANOSTYRENE                            |                                                  |
| 4-METHOXYSTYRENE                          |                                                  |
| 2-VINYL-4,6-DIAMINO-1,3,5-TRIAZINE        |                                                  |
| 3-(TRIFLUOROMETHYL)STYRENE                |                                                  |
| 2-BROMO-6-(1H-PYRROL-1-YL)PYRIDINE        |                                                  |
| P-SULFONAMIDO STYRENE                     |                                                  |
| 3-BROMOSTYRENE                            |                                                  |
| 3-(1H-PYRROL-1-YL)BENZALDEHYDE            |                                                  |
| 2-ISOPROPENYLANILINE                      |                                                  |
| 1-PHENYLPYRROLE                           |                                                  |
| 3-VINYLBENZALDEHYDE                       |                                                  |
| 1-(2-AMINOPHENYL)PYRROLE                  |                                                  |
| 4-PHENOXYSTYRENE                          |                                                  |

|                                                             |                                           |
|-------------------------------------------------------------|-------------------------------------------|
| 4-METHYL-5-VINYLTIAZOLE                                     |                                           |
| N-METHYLPYRROLE                                             |                                           |
| KETENE DIMETHYL ACETAL                                      |                                           |
| N-[TRIS(HYDROXYMETHYL)METHYL]ACRYLAMIDE                     |                                           |
| 2-HYDROXYETHYL METHACRYLATE                                 |                                           |
| ALPHA-METHYLENE-GAMMA-BUTYROLACTONE                         |                                           |
| TERT-BUTYL METHACRYLATE                                     |                                           |
| 2(5H)-FURANONE                                              |                                           |
| METHACRYLAMIDE                                              |                                           |
| N-ISOPROPYLACRYLAMIDE                                       |                                           |
| N-[3-(DIMETHYLAMINO)PROPYL]ACRYLAMIDE                       |                                           |
| N-BENZYLACRYLAMIDE                                          |                                           |
| 2-ACETAMIDOACRYLIC ACID METHYL ESTER                        |                                           |
| 2-(DIMETHYLAMINO)ETHYL METHACRYLATE                         |                                           |
| 3-(1H-PYRROL-1-YL)ANILINE                                   |                                           |
| 3-(DIMETHYLAMINO)PROPYL ACRYLATE                            |                                           |
| 2-BROMO-6-(1H-PYRROL-1-YL)PYRIDINE                          |                                           |
| 3-(1H-PYRROL-1-YL)BENZALDEHYDE                              |                                           |
| N-ISOPROPYLACRYLAMIDE                                       |                                           |
| 1-(4-NITROPHENYL)-1H-PYRROLE                                |                                           |
| 1-PHENYLPYRROLE                                             |                                           |
| 4-BROMOSTYRENE                                              |                                           |
| (Z)-N-METHYL-1-(1-METHYL-1H-IMIDAZOL-2-YL)METHANIMINE OXIDE |                                           |
| 2-CHLOROSTYRENE                                             |                                           |
| 4-NITROSTYRENE                                              |                                           |
| 2-VINYLNAPHTHALENE                                          |                                           |
| 3,5-DIMETHYL-4-VINYL-1H-PYRAZOLE                            |                                           |
| N-VINYLACETAMIDE                                            |                                           |
| 4-METHYLSTYRENE                                             |                                           |
| (Z)-N-CYCLOHEXYL-1-(PYRIDIN-2-YL)METHANIMINE OXIDE          |                                           |
| ALPHA-METHYLSTYRENE                                         |                                           |
| (Z)-5-OXO-2-(PYRIDIN-3-YLMETHYLENE)PYRAZOLIDIN-2-IUM-1-IDE  |                                           |
| 1-VINYLMIDAZOLE                                             |                                           |
| N-ETHYL ACRYLAMIDE                                          |                                           |
| 4-ACRYLOYLMORPHOLINE                                        |                                           |
| N-ETHYLMETHACRYLAMIDE                                       |                                           |
| 4-(1H-PYRROL-1-YL)ANILINE                                   |                                           |
| N-METHYLHYDROXYLAMINE                                       | 4-AMINOPYRIDINE-3-CARBALDEHYDE            |
| N-ETHYLHYDROXYLAMINE                                        | 3,5-DIMETHYLSOXAZOLE-4-CARBOXALDEHYDE     |
| N-CYCLOPENTYLHYDROXYLAMINE                                  | 3,5-DIMETHYLSOXAZOLE-4-CARBOXALDEHYDE     |
| CYCLOHEXYLHYDROXYLAMINE                                     | 3,5-DIMETHYLSOXAZOLE-4-CARBOXALDEHYDE     |
| N-BENZYLHYDROXYLAMINE                                       | 3,5-DIMETHYLSOXAZOLE-4-CARBOXALDEHYDE     |
| N-METHYLHYDROXYLAMINE                                       | 3-METHYL-1H-PYRAZOLE-4-CARBALDEHYDE       |
| 3-(HYDROXYAMINO)TETRAHYDROTHIOPHENE 1,1-DIOXIDE             | 3-METHYL-1H-PYRAZOLE-4-CARBALDEHYDE       |
| N-METHYLHYDROXYLAMINE                                       | 4-METHYL-5-FORMYLTHIAZOLE                 |
| N-ETHYLHYDROXYLAMINE                                        | 4-METHYL-5-FORMYLTHIAZOLE                 |
| N-METHYLHYDROXYLAMINE                                       | 2-PYRIDINECARBOXALDEHYDE                  |
| N-ETHYLHYDROXYLAMINE                                        | 2-PYRIDINECARBOXALDEHYDE                  |
| N-(TERT-BUTYL)HYDROXYLAMINE                                 | 2-PYRIDINECARBOXALDEHYDE                  |
| CYCLOHEXYLHYDROXYLAMINE                                     | 2-PYRIDINECARBOXALDEHYDE                  |
| N-BENZYLHYDROXYLAMINE                                       | 2-PYRIDINECARBOXALDEHYDE                  |
| 3-(HYDROXYAMINO)TETRAHYDROTHIOPHENE 1,1-DIOXIDE             | 2-PYRIDINECARBOXALDEHYDE                  |
| N-METHYLHYDROXYLAMINE                                       | 1-METHYL-1H-IMIDAZOLE-4-CARBALDEHYDE      |
| N-(TERT-BUTYL)HYDROXYLAMINE                                 | 1-METHYL-1H-IMIDAZOLE-4-CARBALDEHYDE      |
| CYCLOHEXYLHYDROXYLAMINE                                     | 1-METHYL-1H-IMIDAZOLE-4-CARBALDEHYDE      |
| 3-(HYDROXYAMINO)TETRAHYDROTHIOPHENE 1,1-DIOXIDE             | 1-METHYL-1H-IMIDAZOLE-4-CARBALDEHYDE      |
| N-ETHYLHYDROXYLAMINE                                        | 1-METHYL-1H-PYRAZOLE-3-CARBALDEHYDE       |
| N-CYCLOPENTYLHYDROXYLAMINE                                  | 1-METHYL-1H-PYRAZOLE-3-CARBALDEHYDE       |
| CYCLOHEXYLHYDROXYLAMINE                                     | 1-METHYL-1H-PYRAZOLE-3-CARBALDEHYDE       |
| 3-(HYDROXYAMINO)TETRAHYDROTHIOPHENE 1,1-DIOXIDE             | 1-METHYL-1H-PYRAZOLE-3-CARBALDEHYDE       |
| N-METHYLHYDROXYLAMINE                                       | 4-METHYL-4H-1,2,4-TRIAZOLE-3-CARBALDEHYDE |
| N-ETHYLHYDROXYLAMINE                                        | 4-METHYL-4H-1,2,4-TRIAZOLE-3-CARBALDEHYDE |
| N-(TERT-BUTYL)HYDROXYLAMINE                                 | 4-METHYL-4H-1,2,4-TRIAZOLE-3-CARBALDEHYDE |
| CYCLOHEXYLHYDROXYLAMINE                                     | 4-METHYL-4H-1,2,4-TRIAZOLE-3-CARBALDEHYDE |
| N-BENZYLHYDROXYLAMINE                                       | 4-METHYL-4H-1,2,4-TRIAZOLE-3-CARBALDEHYDE |
| 3-(HYDROXYAMINO)TETRAHYDROTHIOPHENE 1,1-DIOXIDE             | 4-METHYL-4H-1,2,4-TRIAZOLE-3-CARBALDEHYDE |
| N-METHYLHYDROXYLAMINE                                       | OXAZOLE-2-CARBALDEHYDE                    |
| N-ETHYLHYDROXYLAMINE                                        | OXAZOLE-2-CARBALDEHYDE                    |
| N-(TERT-BUTYL)HYDROXYLAMINE                                 | OXAZOLE-2-CARBALDEHYDE                    |
| N-CYCLOPENTYLHYDROXYLAMINE                                  | OXAZOLE-2-CARBALDEHYDE                    |
| CYCLOHEXYLHYDROXYLAMINE                                     | OXAZOLE-2-CARBALDEHYDE                    |

|                                                 |                                           |
|-------------------------------------------------|-------------------------------------------|
| N-BENZYLHYDROXYLAMINE                           | OXAZOLE-2-CARBALDEHYDE                    |
| 3-(HYDROXYAMINO)TETRAHYDROTHIOPHENE 1,1-DIOXIDE | OXAZOLE-2-CARBALDEHYDE                    |
| N-METHYLHYDROXYLAMINE                           | 3-CHLORO-2-FORMYLPYRIDINE                 |
| N-ETHYLHYDROXYLAMINE                            | 3-CHLORO-2-FORMYLPYRIDINE                 |
| CYCLOHEXYLHYDROXYLAMINE                         | 3-CHLORO-2-FORMYLPYRIDINE                 |
| N-BENZYLHYDROXYLAMINE                           | 3-CHLORO-2-FORMYLPYRIDINE                 |
| 3-(HYDROXYAMINO)TETRAHYDROTHIOPHENE 1,1-DIOXIDE | 3-CHLORO-2-FORMYLPYRIDINE                 |
| N-METHYLHYDROXYLAMINE                           | 1H-PYRAZOLE-4-CARBOXALDEHYDE              |
| 3-(HYDROXYAMINO)TETRAHYDROTHIOPHENE 1,1-DIOXIDE | 1H-PYRAZOLE-4-CARBOXALDEHYDE              |
| N-METHYLHYDROXYLAMINE                           | 5-METHYLISOXAZOLE-3-CARBOXALDEHYDE        |
| N-ETHYLHYDROXYLAMINE                            | 5-METHYLISOXAZOLE-3-CARBOXALDEHYDE        |
| N-(TERT-BUTYL)HYDROXYLAMINE                     | 5-METHYLISOXAZOLE-3-CARBOXALDEHYDE        |
| CYCLOHEXYLHYDROXYLAMINE                         | 5-METHYLISOXAZOLE-3-CARBOXALDEHYDE        |
| N-BENZYLHYDROXYLAMINE                           | 5-METHYLISOXAZOLE-3-CARBOXALDEHYDE        |
| 3-(HYDROXYAMINO)TETRAHYDROTHIOPHENE 1,1-DIOXIDE | 5-METHYLISOXAZOLE-3-CARBOXALDEHYDE        |
| N-ETHYLHYDROXYLAMINE                            | 2,5-DIMETHYLOXAZOLE-4-CARBALDEHYDE        |
| N-CYCLOPENTYLHYDROXYLAMINE                      | 2,5-DIMETHYLOXAZOLE-4-CARBALDEHYDE        |
| CYCLOHEXYLHYDROXYLAMINE                         | 2,5-DIMETHYLOXAZOLE-4-CARBALDEHYDE        |
| N-BENZYLHYDROXYLAMINE                           | 2,5-DIMETHYLOXAZOLE-4-CARBALDEHYDE        |
| 3-(HYDROXYAMINO)TETRAHYDROTHIOPHENE 1,1-DIOXIDE | 2,5-DIMETHYLOXAZOLE-4-CARBALDEHYDE        |
| N-METHYLHYDROXYLAMINE                           | 1-METHYL-2-IMIDAZOLECARBOXALDEHYDE        |
| N-ETHYLHYDROXYLAMINE                            | 1-METHYL-2-IMIDAZOLECARBOXALDEHYDE        |
| N-CYCLOPENTYLHYDROXYLAMINE                      | 1-METHYL-2-IMIDAZOLECARBOXALDEHYDE        |
| CYCLOHEXYLHYDROXYLAMINE                         | 1-METHYL-2-IMIDAZOLECARBOXALDEHYDE        |
| N-BENZYLHYDROXYLAMINE                           | 1-METHYL-2-IMIDAZOLECARBOXALDEHYDE        |
| 3-(HYDROXYAMINO)TETRAHYDROTHIOPHENE 1,1-DIOXIDE | 1-METHYL-2-IMIDAZOLECARBOXALDEHYDE        |
| N-METHYLHYDROXYLAMINE                           | PYRIDAZINE-3-CARBALDEHYDE                 |
| N-ETHYLHYDROXYLAMINE                            | PYRIDAZINE-3-CARBALDEHYDE                 |
| N-(TERT-BUTYL)HYDROXYLAMINE                     | PYRIDAZINE-3-CARBALDEHYDE                 |
| N-CYCLOPENTYLHYDROXYLAMINE                      | PYRIDAZINE-3-CARBALDEHYDE                 |
| CYCLOHEXYLHYDROXYLAMINE                         | PYRIDAZINE-3-CARBALDEHYDE                 |
| N-BENZYLHYDROXYLAMINE                           | PYRIDAZINE-3-CARBALDEHYDE                 |
| 3-(HYDROXYAMINO)TETRAHYDROTHIOPHENE 1,1-DIOXIDE | PYRIDAZINE-3-CARBALDEHYDE                 |
| N-METHYLHYDROXYLAMINE                           | 3-FORMYL-5-METHOXYPYRIDINE                |
| N-ETHYLHYDROXYLAMINE                            | 3-FORMYL-5-METHOXYPYRIDINE                |
| CYCLOHEXYLHYDROXYLAMINE                         | 3-FORMYL-5-METHOXYPYRIDINE                |
| N-BENZYLHYDROXYLAMINE                           | 3-FORMYL-5-METHOXYPYRIDINE                |
| 3-(HYDROXYAMINO)TETRAHYDROTHIOPHENE 1,1-DIOXIDE | 3-FORMYL-5-METHOXYPYRIDINE                |
| N-METHYLHYDROXYLAMINE                           | PYRIMIDINE-5-CARBOXALDEHYDE               |
| N-ETHYLHYDROXYLAMINE                            | PYRIMIDINE-5-CARBOXALDEHYDE               |
| N-(TERT-BUTYL)HYDROXYLAMINE                     | PYRIMIDINE-5-CARBOXALDEHYDE               |
| CYCLOHEXYLHYDROXYLAMINE                         | PYRIMIDINE-5-CARBOXALDEHYDE               |
| N-BENZYLHYDROXYLAMINE                           | PYRIMIDINE-5-CARBOXALDEHYDE               |
| 3-(HYDROXYAMINO)TETRAHYDROTHIOPHENE 1,1-DIOXIDE | PYRIMIDINE-5-CARBOXALDEHYDE               |
| N-(PYRIDIN-2-YLMETHYL)HYDROXYLAMINE             | 3,5-DIMETHYLISOXAZOLE-4-CARBOXALDEHYDE    |
| N-[2-CHLOROPHENYLMETHYL]HYDROXYLAMINE           | 3,5-DIMETHYLISOXAZOLE-4-CARBOXALDEHYDE    |
| N-(4-CHLOROBENZYL)HYDROXYLAMINE                 | 3,5-DIMETHYLISOXAZOLE-4-CARBOXALDEHYDE    |
| N-(2,4-DICHLOROBENZYL)HYDROXYLAMINE             | 3,5-DIMETHYLISOXAZOLE-4-CARBOXALDEHYDE    |
| N-(2,4-DICHLOROBENZYL)HYDROXYLAMINE             | 3-METHYL-1H-PYRAZOLE-4-CARBALDEHYDE       |
| N-(2,4-DICHLOROBENZYL)HYDROXYLAMINE             | 4-METHYL-5-FORMYLTHIAZOLE                 |
| N-(4-CHLOROBENZYL)HYDROXYLAMINE                 | 2-PYRIDINECARBOXALDEHYDE                  |
| (4-((HYDROXYAMINO)METHYL)PHENYL)METHANOL        | 2-PYRIDINECARBOXALDEHYDE                  |
| 3-PYRAZOLIDINONE                                | 2-PYRIDINECARBOXALDEHYDE                  |
| N-(2,4-DICHLOROBENZYL)HYDROXYLAMINE             | 2-PYRIDINECARBOXALDEHYDE                  |
| N-(2,4-DICHLOROBENZYL)HYDROXYLAMINE             | 1-METHYL-1H-IMIDAZOLE-4-CARBALDEHYDE      |
| N-[2-CHLOROPHENYLMETHYL]HYDROXYLAMINE           | 1-METHYL-1H-PYRAZOLE-3-CARBALDEHYDE       |
| N-(2,4-DICHLOROBENZYL)HYDROXYLAMINE             | 1-METHYL-1H-PYRAZOLE-3-CARBALDEHYDE       |
| N-[2-CHLOROPHENYLMETHYL]HYDROXYLAMINE           | 4-METHYL-4H-1,2,4-TRIAZOLE-3-CARBALDEHYDE |
| N-(4-CHLOROBENZYL)HYDROXYLAMINE                 | 4-METHYL-4H-1,2,4-TRIAZOLE-3-CARBALDEHYDE |
| (4-((HYDROXYAMINO)METHYL)PHENYL)METHANOL        | 4-METHYL-4H-1,2,4-TRIAZOLE-3-CARBALDEHYDE |
| N-(2,4-DICHLOROBENZYL)HYDROXYLAMINE             | 4-METHYL-4H-1,2,4-TRIAZOLE-3-CARBALDEHYDE |
| N-[2-CHLOROPHENYLMETHYL]HYDROXYLAMINE           | OXAZOLE-2-CARBALDEHYDE                    |
| N-(4-CHLOROBENZYL)HYDROXYLAMINE                 | OXAZOLE-2-CARBALDEHYDE                    |
| (4-((HYDROXYAMINO)METHYL)PHENYL)METHANOL        | OXAZOLE-2-CARBALDEHYDE                    |
| 3-PYRAZOLIDINONE                                | OXAZOLE-2-CARBALDEHYDE                    |
| N-(2,4-DICHLOROBENZYL)HYDROXYLAMINE             | OXAZOLE-2-CARBALDEHYDE                    |
| N-[2-CHLOROPHENYLMETHYL]HYDROXYLAMINE           | 3-CHLORO-2-FORMYLPYRIDINE                 |
| N-(4-CHLOROBENZYL)HYDROXYLAMINE                 | 3-CHLORO-2-FORMYLPYRIDINE                 |
| (4-((HYDROXYAMINO)METHYL)PHENYL)METHANOL        | 3-CHLORO-2-FORMYLPYRIDINE                 |
| N-(2,4-DICHLOROBENZYL)HYDROXYLAMINE             | 3-CHLORO-2-FORMYLPYRIDINE                 |
| N-(2,4-DICHLOROBENZYL)HYDROXYLAMINE             | 1H-PYRAZOLE-4-CARBOXALDEHYDE              |

|                                          |                                    |
|------------------------------------------|------------------------------------|
| N-(PYRIDIN-2-YLMETHYL)HYDROXYLAMINE      | 5-METHYLISOXAZOLE-3-CARBOXALDEHYDE |
| N-[2-CHLOROPHENYLMETHYL]HYDROXYLAMINE    | 5-METHYLISOXAZOLE-3-CARBOXALDEHYDE |
| N-(4-CHLOROBENZYL)HYDROXYLAMINE          | 5-METHYLISOXAZOLE-3-CARBOXALDEHYDE |
| (4-((HYDROXYAMINO)METHYL)PHENYL)METHANOL | 5-METHYLISOXAZOLE-3-CARBOXALDEHYDE |
| N-(2,4-DICHLOROBENZYL)HYDROXYLAMINE      | 5-METHYLISOXAZOLE-3-CARBOXALDEHYDE |
| N-[2-CHLOROPHENYLMETHYL]HYDROXYLAMINE    | 2,5-DIMETHYLOXAZOLE-4-CARBALDEHYDE |
| N-(4-CHLOROBENZYL)HYDROXYLAMINE          | 2,5-DIMETHYLOXAZOLE-4-CARBALDEHYDE |
| N-(2,4-DICHLOROBENZYL)HYDROXYLAMINE      | 2,5-DIMETHYLOXAZOLE-4-CARBALDEHYDE |
| N-(2,4-DICHLOROBENZYL)HYDROXYLAMINE      | 5-METHYLIMIDAZOLE-4-CARBOXALDEHYDE |
| N-[2-CHLOROPHENYLMETHYL]HYDROXYLAMINE    | 1-METHYL-2-IMIDAZOLECARBOXALDEHYDE |
| N-(4-CHLOROBENZYL)HYDROXYLAMINE          | 1-METHYL-2-IMIDAZOLECARBOXALDEHYDE |
| 3-PYRAZOLIDINONE                         | 1-METHYL-2-IMIDAZOLECARBOXALDEHYDE |
| N-(2,4-DICHLOROBENZYL)HYDROXYLAMINE      | 1-METHYL-2-IMIDAZOLECARBOXALDEHYDE |
| N-[2-CHLOROPHENYLMETHYL]HYDROXYLAMINE    | PYRIDAZINE-3-CARBALDEHYDE          |
| N-(4-CHLOROBENZYL)HYDROXYLAMINE          | PYRIDAZINE-3-CARBALDEHYDE          |
| N-(2,4-DICHLOROBENZYL)HYDROXYLAMINE      | PYRIDAZINE-3-CARBALDEHYDE          |
| N-(PYRIDIN-2-YLMETHYL)HYDROXYLAMINE      | 3-FORMYL-5-METHOXYPYRIDINE         |
| N-[2-CHLOROPHENYLMETHYL]HYDROXYLAMINE    | 3-FORMYL-5-METHOXYPYRIDINE         |
| N-(4-CHLOROBENZYL)HYDROXYLAMINE          | 3-FORMYL-5-METHOXYPYRIDINE         |
| N-(2,4-DICHLOROBENZYL)HYDROXYLAMINE      | 3-FORMYL-5-METHOXYPYRIDINE         |
| N-(2-METHOXYBENZYL)HYDROXYLAMINE         | 3-FORMYL-5-METHOXYPYRIDINE         |
| N-(PYRIDIN-2-YLMETHYL)HYDROXYLAMINE      | PYRIMIDINE-5-CARBOXALDEHYDE        |
| N-[2-CHLOROPHENYLMETHYL]HYDROXYLAMINE    | PYRIMIDINE-5-CARBOXALDEHYDE        |
| N-(4-CHLOROBENZYL)HYDROXYLAMINE          | PYRIMIDINE-5-CARBOXALDEHYDE        |
| (4-((HYDROXYAMINO)METHYL)PHENYL)METHANOL | PYRIMIDINE-5-CARBOXALDEHYDE        |
| N-(2,4-DICHLOROBENZYL)HYDROXYLAMINE      | PYRIMIDINE-5-CARBOXALDEHYDE        |

## Validation of *N*-capping reactions

### Reductive amination conditions:

On-DNA substrate (1  $\mu$ L, 0.26–0.38 mM in water, 0.25–0.50 nmol) was combined with acetate buffer (1 M, pH 5, 2–4  $\mu$ L). The aldehyde was added (200 mM in MeCN or DMF, 1–2  $\mu$ L). After 10 min, NaH<sub>3</sub>BCN (200 mM in water, 0.75–1.5  $\mu$ L) was added and the resulting mixture was incubated at rt for 18 h. Reactions were subjected to ethanol-induced precipitation. The pellets were washed with EtOH:water (5:1) and analyzed by UPLC-MS.

### Sulfonylation conditions:

On-DNA substrate (1  $\mu$ L, 0.26–0.38 mM in water, 0.25–0.50 nmol) was combined with phosphate buffer (0.1 M, pH 8, 0.75–1.5  $\mu$ L). The sulfonyl chloride (200 mM in MeCN, 0.5–1  $\mu$ L) was added and the resulting mixture was incubated at rt for 18 h. Reactions were subjected to ethanol-induced precipitation. The pellets were washed with EtOH:water (5:1) and analyzed by UPLC-MS.

### Acylation conditions:

On-DNA substrate (1  $\mu$ L, 0.26–0.38 mM in water, 0.25–0.50 nmol) was combined with phosphate buffer (0.1 M, pH 8, 0.75–1.5  $\mu$ L). The NHS-ester (200 mM in DMF, 0.5–1  $\mu$ L) was added and the resulting mixture was incubated at rt for 18 h. Reactions were subjected to ethanol-induced precipitation. The pellets were washed with EtOH:water (5:1) and analyzed by UPLC-MS.

### Carbamoylation conditions:

On-DNA substrate (1  $\mu$ L, 0.26–0.38 mM in water, 0.25–0.50 nmol) was combined with phosphate buffer (0.1 M, pH 8, 0.75–1.5  $\mu$ L). The isocyanate (200 mM in MeCN, 0.5–1  $\mu$ L) was added and the resulting mixture was incubated at rt for 18 h. Reactions were subjected to ethanol-induced precipitation. The pellets were washed with EtOH:water (5:1) and analyzed by UPLC-MS.

The following charts show the chemical structures of expected products and the %AUC of observed DNA-conjugates as sum of individual species (e.g. stereoisomeric products) after performing the reaction sequence (strain-promoted cycloaddition/Fmoc-deprotection/*N*-capping).

| Reductive aminations                                                                                            |                                                                                                                 |                                                                                                                 |                                                                                                                  |                                                                                                                   |
|-----------------------------------------------------------------------------------------------------------------|-----------------------------------------------------------------------------------------------------------------|-----------------------------------------------------------------------------------------------------------------|------------------------------------------------------------------------------------------------------------------|-------------------------------------------------------------------------------------------------------------------|
| 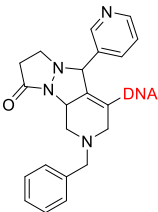 <p>Exact Mass: 5624.2614</p>  | 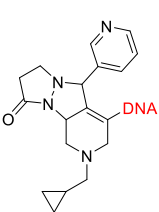 <p>Exact Mass: 5588.2614</p>  | 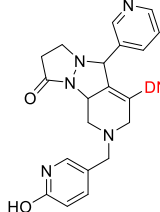 <p>Exact Mass: 5641.2516</p>  | 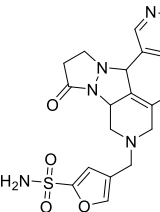 <p>Exact Mass: 5693.2135</p>  | 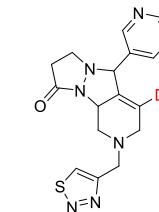 <p>Exact Mass: 5632.2083</p>  |
| <p><b>product: 98%</b><br/>unknown: 2%</p>                                                                      | <p><b>product: 90%</b><br/>unknown: 10%</p>                                                                     | <p><b>product: 99%</b><br/>unknown: 1%</p>                                                                      | <p><b>product: 98%</b><br/>unknown: 2%</p>                                                                       | <p><b>product: 99%</b><br/>unknown: 1%</p>                                                                        |
| 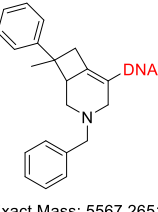 <p>Exact Mass: 5567.2651</p>  | 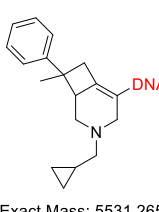 <p>Exact Mass: 5531.2651</p>  | 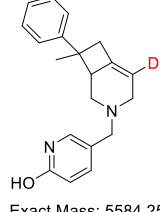 <p>Exact Mass: 5584.2553</p>  | 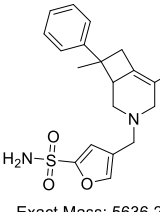 <p>Exact Mass: 5636.2172</p>  | 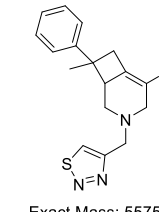 <p>Exact Mass: 5575.2120</p>  |
| <p>SM: 52%<br/><b>product: 43%</b><br/>unknown: 6%</p>                                                          | <p>SM: 9%<br/><b>product: 82%</b><br/>unknown: 9%</p>                                                           | <p>SM: 70%<br/><b>product: 27%</b><br/>unknown: 3%</p>                                                          | <p>SM: 12%<br/><b>product: 57%</b><br/>unknown: 32%</p>                                                          | <p>SM: 13%<br/><b>product: 79%</b><br/>unknown: 8%</p>                                                            |
| 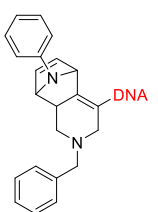 <p>Exact Mass: 5592.2603</p> | 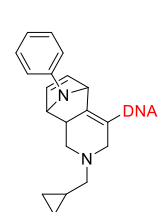 <p>Exact Mass: 5556.2603</p> | 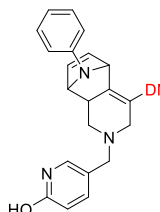 <p>Exact Mass: 5609.2505</p> | 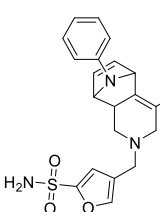 <p>Exact Mass: 5661.2124</p> | 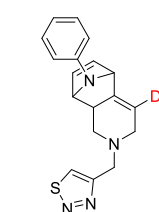 <p>Exact Mass: 5600.2073</p> |
| <p>SM: 37%<br/><b>product: 20%</b><br/>unknown: 43%</p>                                                         | <p>SM: 1%<br/><b>product: 48%</b><br/>unknown: 51%</p>                                                          | <p>SM: 12%<br/><b>product: 71%</b><br/>N-methyl: 17%</p>                                                        | <p>SM: 1%<br/><b>product: 25%</b><br/>unknown: 72%</p>                                                           | <p><b>product: 100%</b><br/>(overlap with impurity)</p>                                                           |

| Sulfonylation                                                                                                                                                        |                                                                                                                                                                          |                                                                                                                                                                      | Acylation                                                                                                                                                              |                                                                                                                                                                | Carbamoylation                                                                                                                                                 |
|----------------------------------------------------------------------------------------------------------------------------------------------------------------------|--------------------------------------------------------------------------------------------------------------------------------------------------------------------------|----------------------------------------------------------------------------------------------------------------------------------------------------------------------|------------------------------------------------------------------------------------------------------------------------------------------------------------------------|----------------------------------------------------------------------------------------------------------------------------------------------------------------|----------------------------------------------------------------------------------------------------------------------------------------------------------------|
| 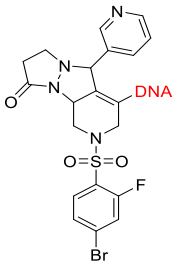 <p>Exact Mass: 5770.1087</p> <p><b>product: 94%</b><br/>unknown: 6%</p>            | 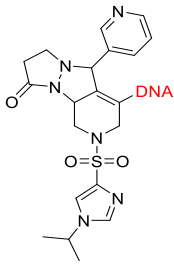 <p>Exact Mass: 5706.2451</p> <p><b>product: 94%</b><br/>unknown: 6%</p>                | 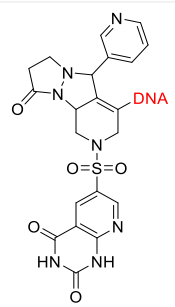 <p>Exact Mass: 5759.1989</p> <p><b>product: 100%</b></p>                           | 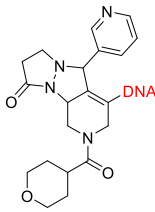 <p>Exact Mass: 5646.2669</p> <p>SM: 10%<br/><b>product: 53%</b><br/>unknown: 38%</p> | 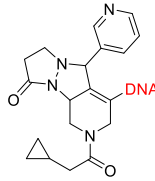 <p>Exact Mass: 5616.2563</p> <p><b>product: 96%</b><br/>unknown: 4%</p>    | 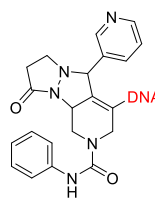 <p>Exact Mass: 5653.2516</p> <p><b>product: 91%</b><br/>unknown: 9%</p>    |
| 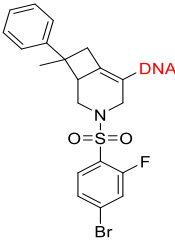 <p>Exact Mass: 5713.1124</p> <p>SM: 6%<br/><b>product: 86%</b><br/>unknown: 8%</p> | 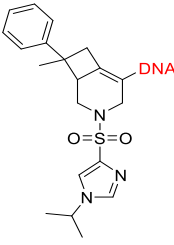 <p>Exact Mass: 5649.2488</p> <p>SM: 57%<br/><b>product: 32%</b><br/>unknown: 11%</p>   | 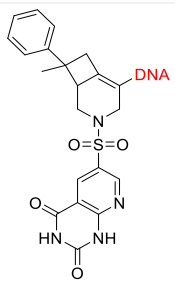 <p>Exact Mass: 5702.2026</p> <p>SM: 6%<br/><b>product: 86%</b><br/>unknown: 8%</p> | 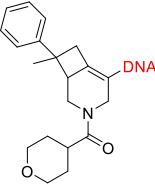 <p>Exact Mass: 5589.2706</p> <p><b>product: 92%</b><br/>unknown: 8%</p>              | 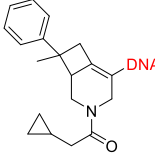 <p>Exact Mass: 5559.2600</p> <p><b>product: 100%</b></p>                   | 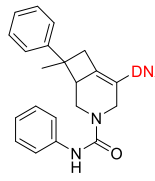 <p>Exact Mass: 5596.2553</p> <p><b>product: 92%</b><br/>unknown: 8%</p>    |
| 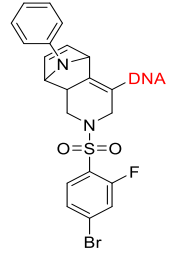 <p>Exact Mass: 5738.1077</p> <p><b>product: 50%</b><br/>unknown: 50%</p>         | 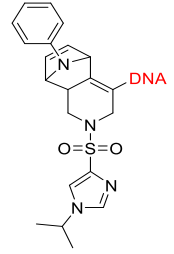 <p>Exact Mass: 5674.2440</p> <p>SM: 13%<br/><b>product: 41%</b><br/>unknown: 47%</p> | 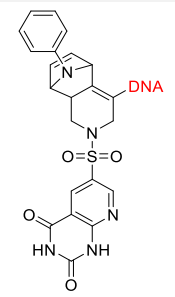 <p>Exact Mass: 5727.1978</p> <p><b>product: 84%</b><br/>unknown: 16%</p>         | 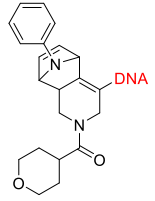 <p>Exact Mass: 5614.2658</p> <p><b>product: 43%</b><br/>unknown: 57%</p>           | 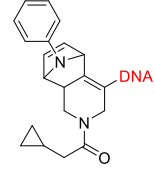 <p>Exact Mass: 5584.2553</p> <p><b>product: 52%</b><br/>unknown: 48%</p> | 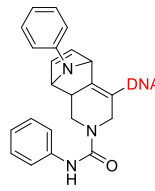 <p>Exact Mass: 5621.2505</p> <p><b>product: 61%</b><br/>unknown: 39%</p> |

|                                                                                                                                                           |                                                                                                                                                       |                                                                                                                                                                       |
|-----------------------------------------------------------------------------------------------------------------------------------------------------------|-------------------------------------------------------------------------------------------------------------------------------------------------------|-----------------------------------------------------------------------------------------------------------------------------------------------------------------------|
| 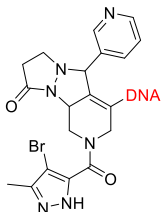 <p>Exact Mass: 5720.1573</p> <p><b>product: 94%</b><br/>unknown: 6%</p> | 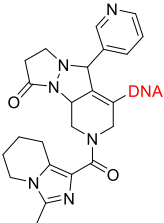 <p>Exact Mass: 5696.2938</p> <p>SM: 14%<br/><b>product: 86%</b></p> | 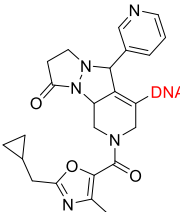 <p>Exact Mass: 5697.2778</p> <p>SM: 1%<br/><b>product: 98%</b><br/>unknown: 1%</p> |
| 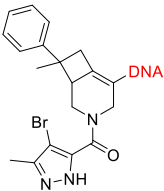 <p>Exact Mass: 5663.1610</p> <p><b>product: 93%</b><br/>unknown: 7%</p> | 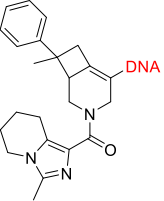 <p>Exact Mass: 5639.2975</p> <p>SM: 30%<br/><b>product: 69%</b></p> | 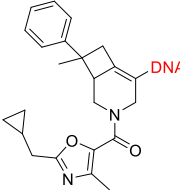 <p>Exact Mass: 5640.2815</p> <p><b>product: 94%</b><br/>unknown: 6%</p>            |

## 5. Analytics of DNA-conjugates

**Table S6.** Analytical data obtained for DNA-conjugates described in Figure 3.

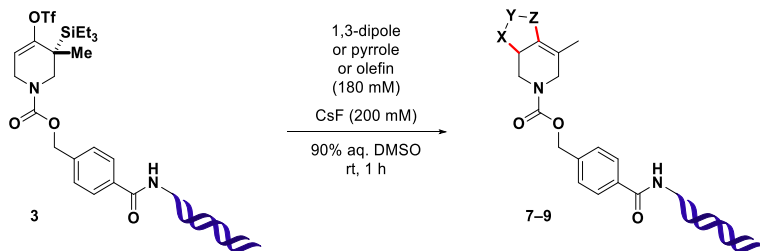

| BB in Figure 3 | Structure | product [%AUC]                                      | calculated mass [Da] | found (MaxEnt1) [Da]                   |
|----------------|-----------|-----------------------------------------------------|----------------------|----------------------------------------|
| 7a             |           | 92                                                  | 5394                 | 5398                                   |
| 7b             |           | >95                                                 | 5387                 | 5388                                   |
| 7c             |           | >95                                                 | 5329                 | 5332                                   |
| 7d             |           | >95                                                 | 5303                 | 5306                                   |
| 7e             |           | 24% (two peaks)<br>27% (more polar, [2+2] N-oxide?) | 5414                 | 5415                                   |
| 7f             |           | 0                                                   | 5305                 | 5253 (-C <sub>4</sub> H <sub>8</sub> ) |
| 8a             |           | >95                                                 | 5271                 | 5273                                   |
| 8b             |           | >95                                                 | 5348                 | 5350                                   |
| 8c             |           | >95                                                 | 5361                 | 5363                                   |
| 8d             |           | >95                                                 | 5343                 | 5346                                   |
| 8e             |           | >95                                                 | 5348                 | 5350                                   |
| 8f             |           | >95                                                 | 5378                 | 5380                                   |
| 8g             |           | 84                                                  | 5348                 | 5350                                   |
| 8h             |           | 81                                                  | 5349                 | 5350                                   |
| 8i             |           | 57                                                  | 5299                 | 5301                                   |
| 8j             |           | 48                                                  | 5378                 | 5380                                   |

|    |  |     |      |             |
|----|--|-----|------|-------------|
| 8k |  | 25  | 5391 | 5391        |
| 8l |  | 46  | 5314 | 5316        |
| 9a |  | >95 | 5310 | 5312        |
| 9b |  | >95 | 5315 | 5317        |
| 9c |  | >95 | 5312 | 5314        |
| 9d |  | >95 | 5284 | 5286        |
| 9e |  | 93  | 5284 | 5287        |
| 9f |  | 95  | 5275 | 5277        |
| 9g |  | >95 | 5289 | 5291        |
| 9h |  | 91  | 5327 | 5328        |
| 9i |  | >95 | 5289 | 5290        |
| 9j |  | >95 | 5331 | 5322        |
| 9k |  | >95 | 5351 | 5353        |
| 9l |  | >95 | 5354 | 5357        |
| 9m |  | >95 | 5303 | 5305        |
| 9n |  | >95 | 5322 | 5324        |
| 9o |  | >95 | 5323 | 5325        |
| 9p |  | >95 | 5308 | 5308        |
| 9q |  | 28  | 5290 | 5290        |
| 9r |  | 0   | 5358 | -           |
| 9s |  | 0   | 5342 | -           |
| 9t |  | 0   | 5325 | 5455 (P+BB) |
| 9u |  | 0   | 5298 | -           |
| 9v |  | 0   | 5276 | -           |
| 9w |  | 0   | 5349 | -           |

|    |                                                                                   |   |      |                           |
|----|-----------------------------------------------------------------------------------|---|------|---------------------------|
| 9x | 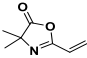 | 0 | 5329 | 5480 (P+H <sub>2</sub> O) |
|----|-----------------------------------------------------------------------------------|---|------|---------------------------|

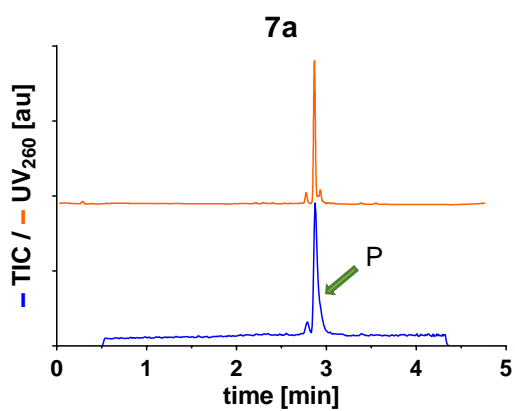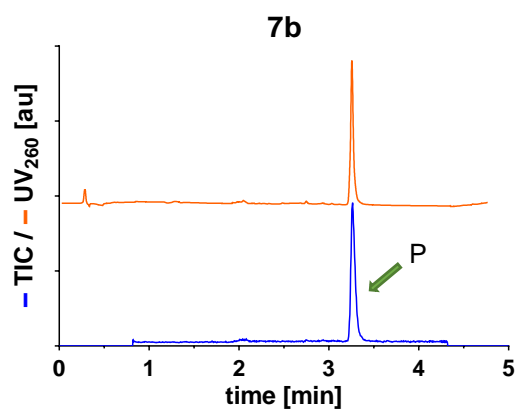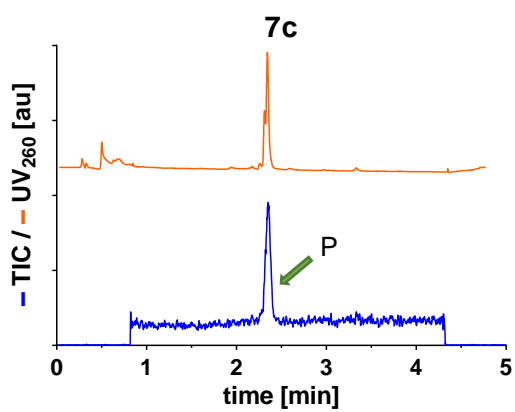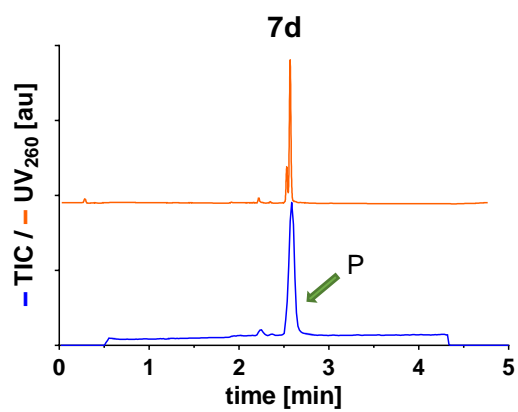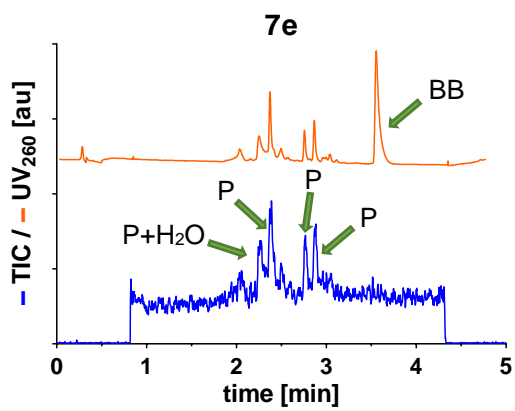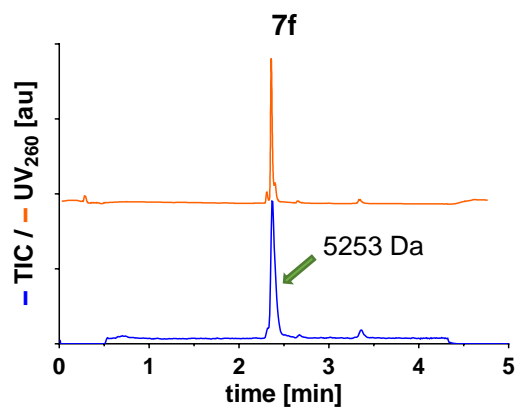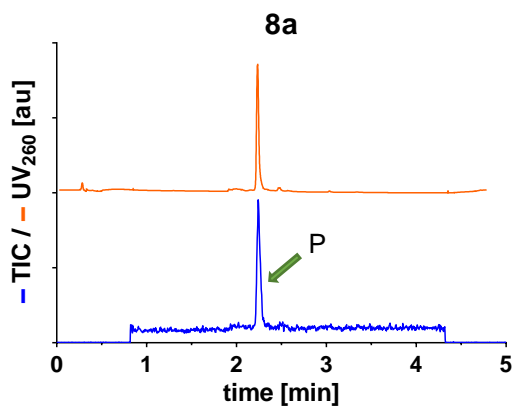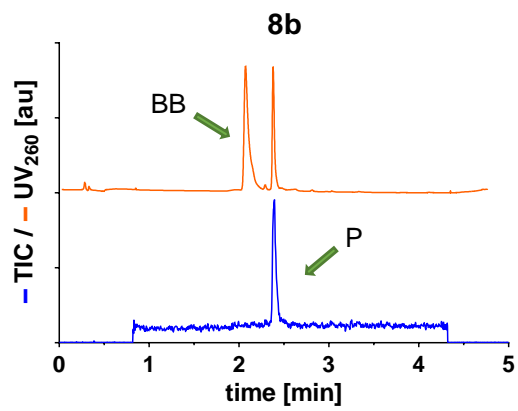

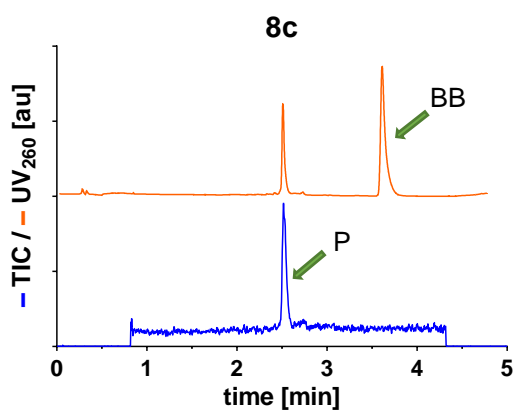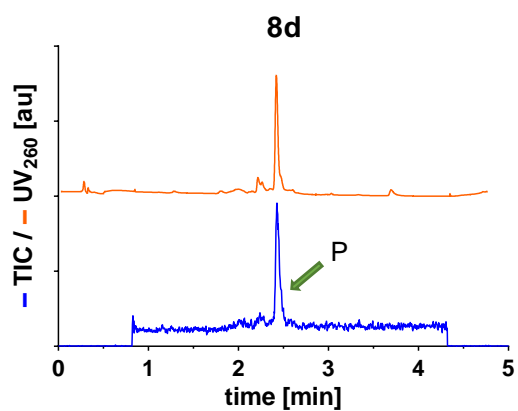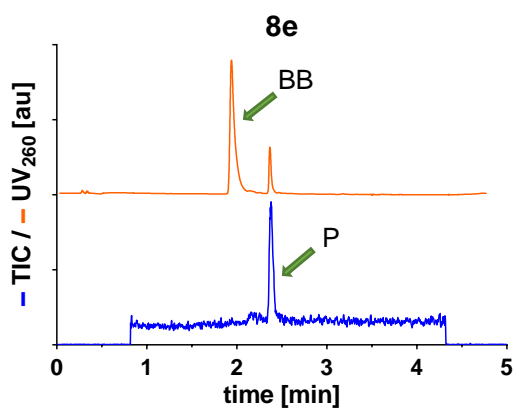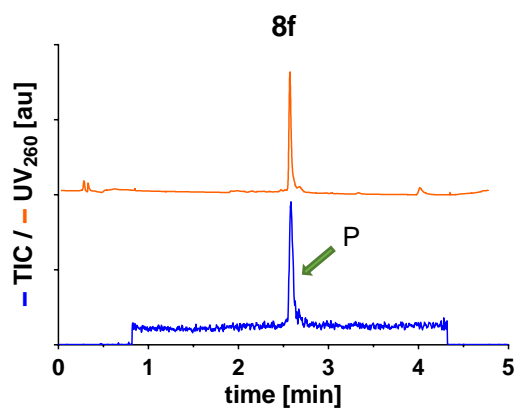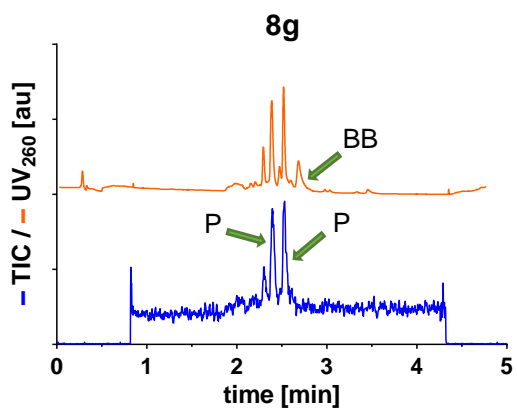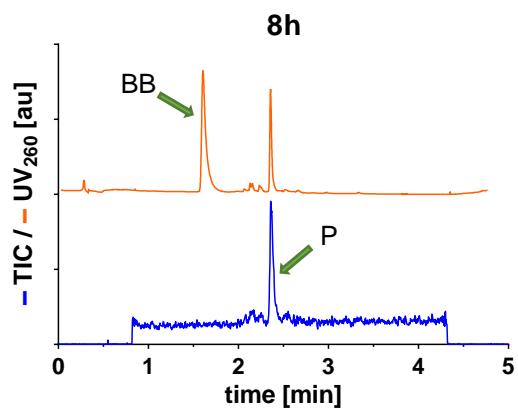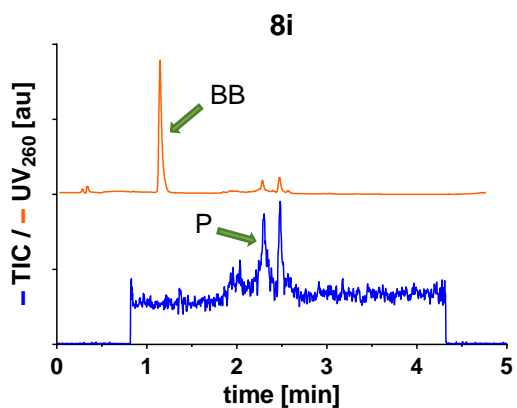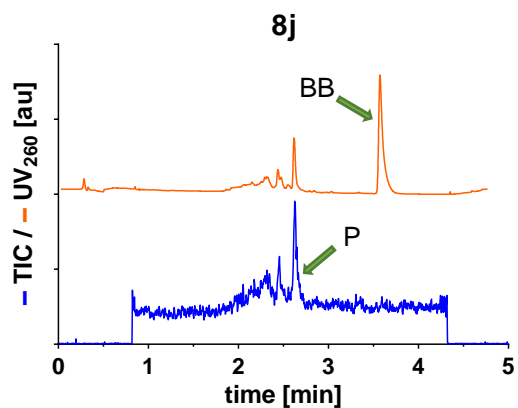

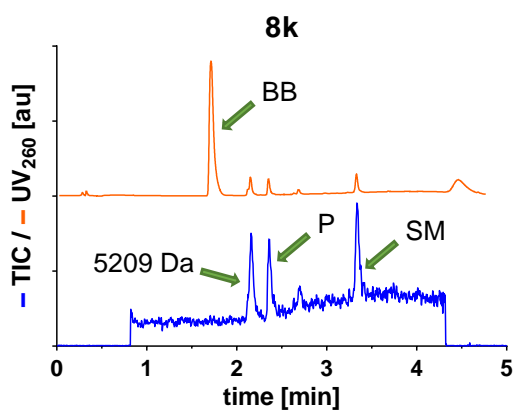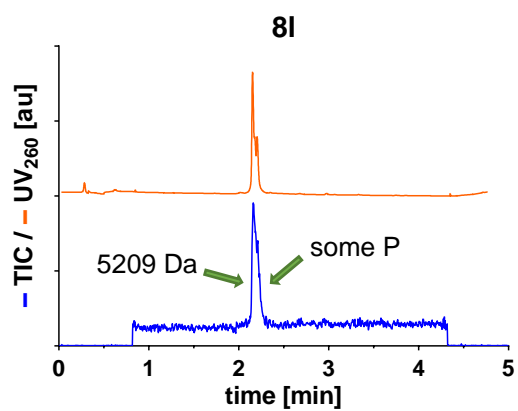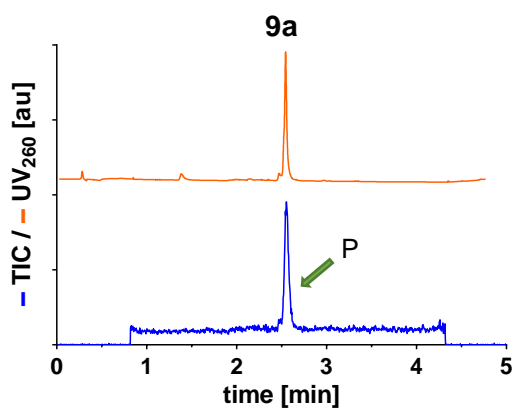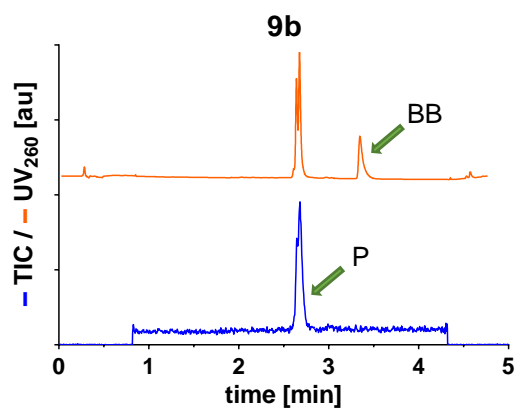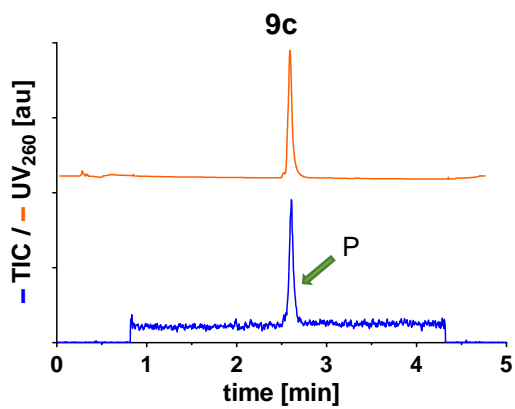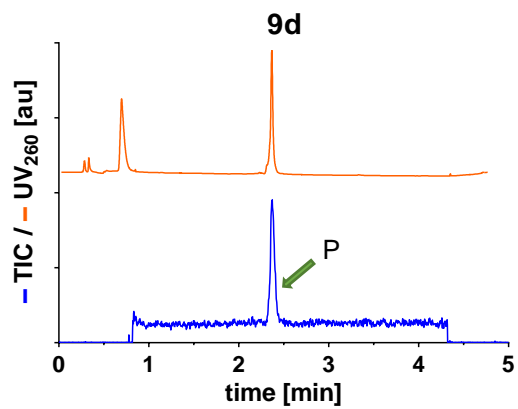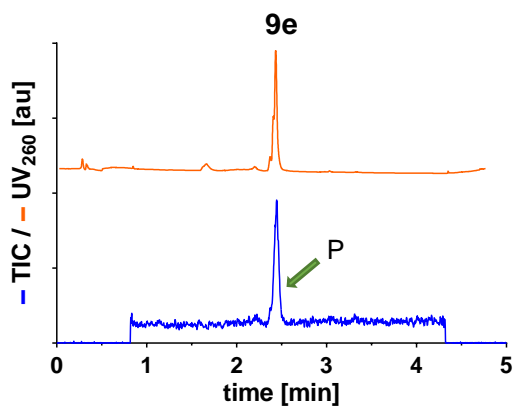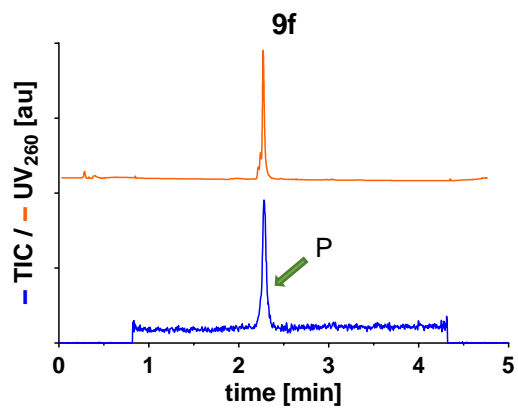

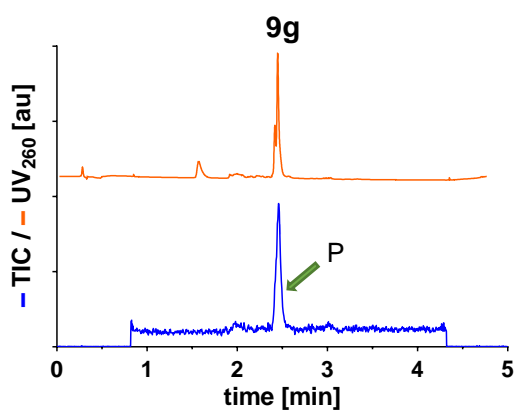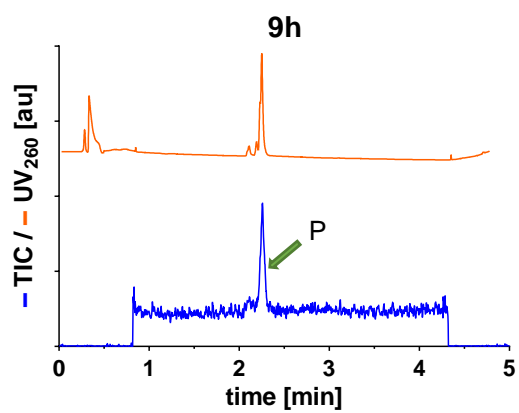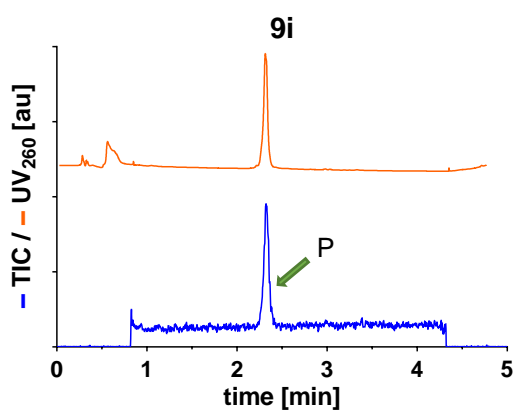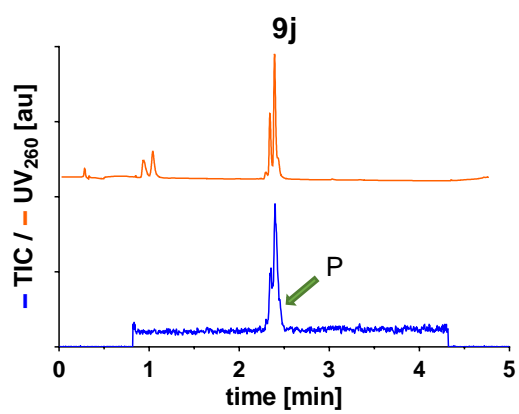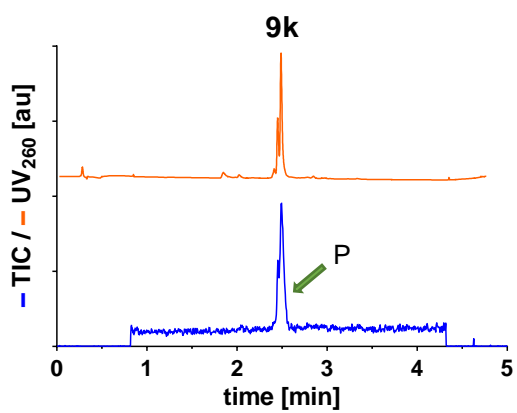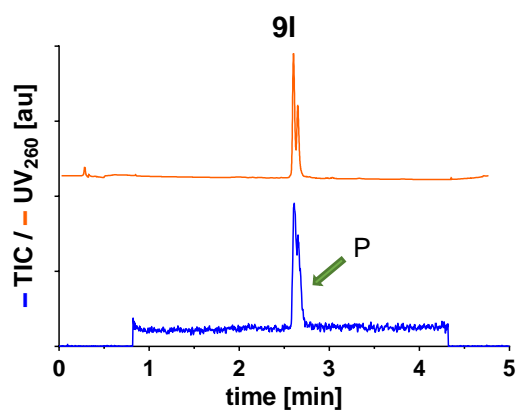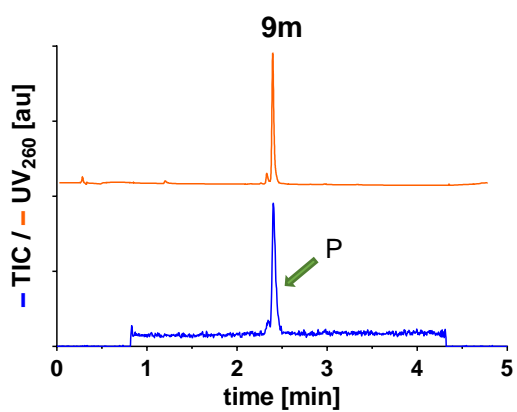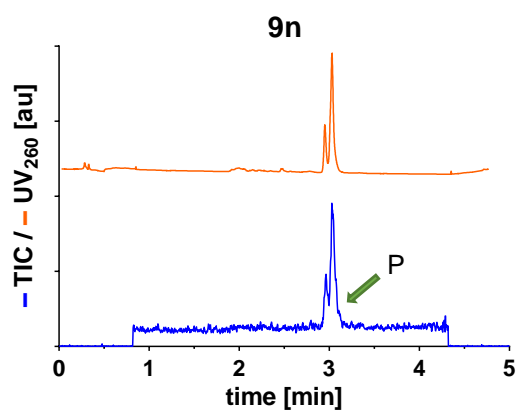

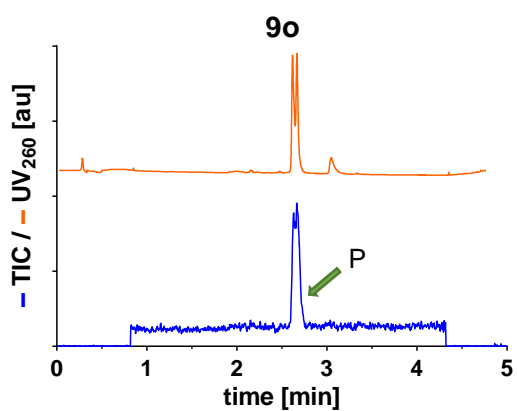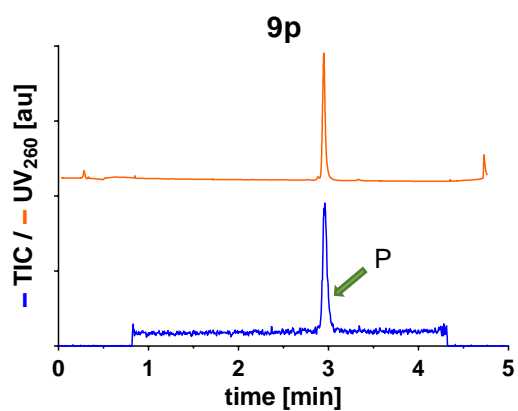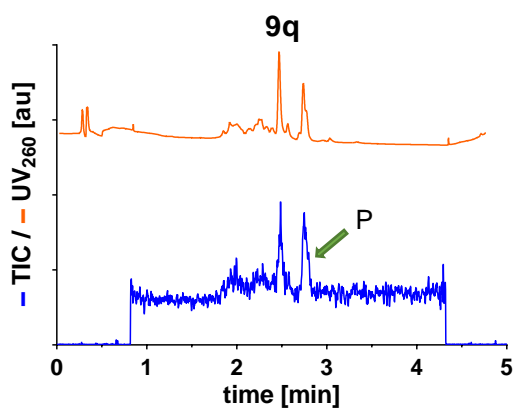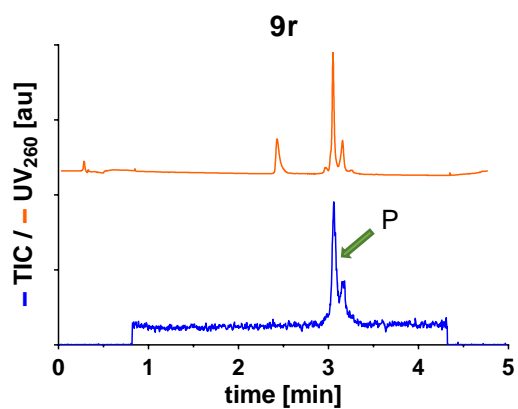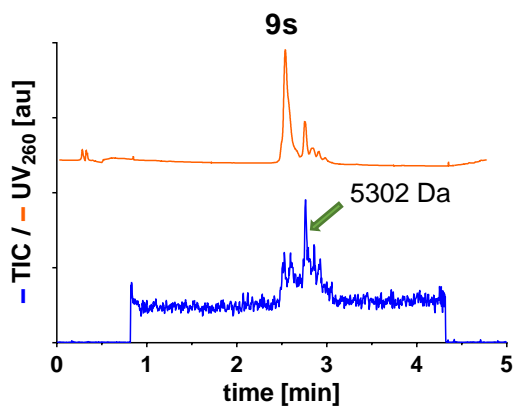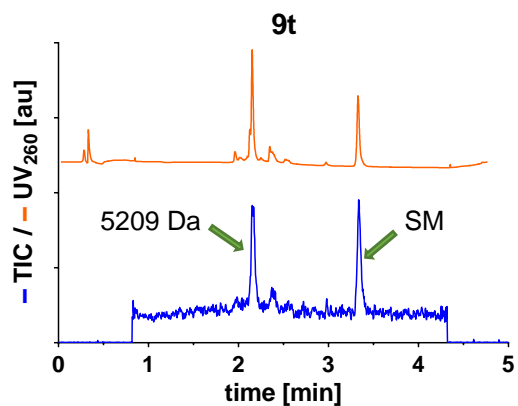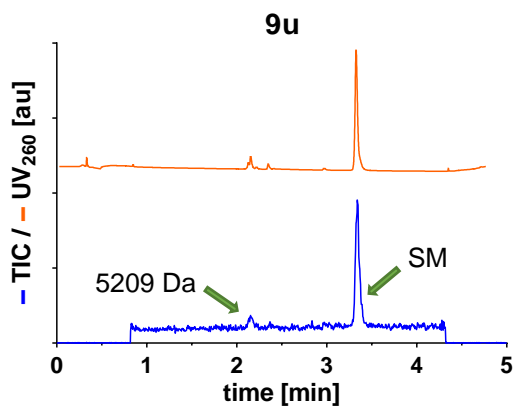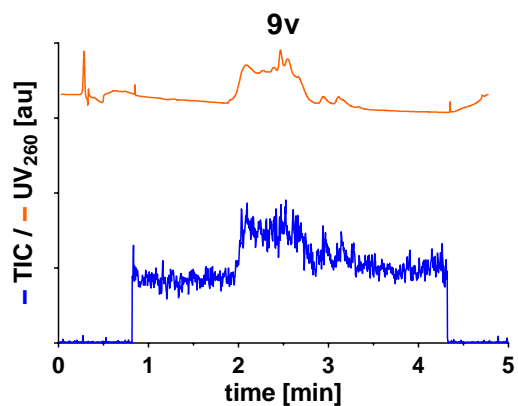

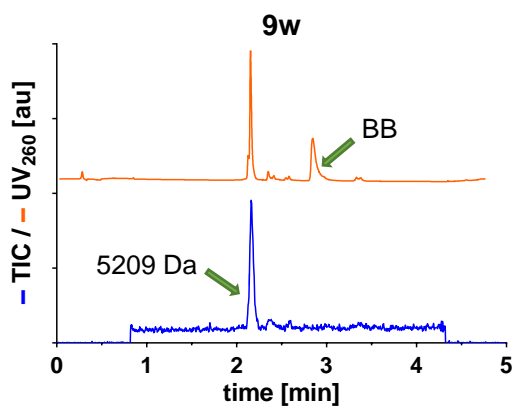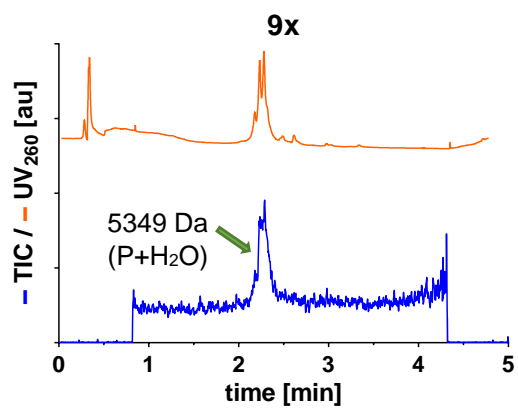

**Table S7.** Analytical data obtained for DNA-conjugates described in Figure S7.

used without purification

| BB in Figure S7 | R | product [%AUC]      | calculated mass [Da] | found (MaxEnt1) [Da]   |
|-----------------|---|---------------------|----------------------|------------------------|
| a               |   | 82                  | 5354                 | 5357                   |
| b               |   | 93                  | 5378                 | 5381                   |
| c               |   | >95                 | 5379                 | 5382                   |
| d               |   | 52                  | 5384                 | 5388                   |
| e               |   | >95                 | 5369                 | 5372                   |
| f               |   | >95                 | 5354                 | 5357                   |
| g               |   | >95                 | 5368                 | 5372                   |
| h               |   | 0 (87) <sup>#</sup> | 5366                 | 5370                   |
| i               |   | >95                 | 5383                 | 5386                   |
| j               |   | 85                  | 5399                 | 5402                   |
| k               |   | >95                 | 5366                 | 5369                   |
| l               |   | >95                 | 5370                 | 5374                   |
| m               |   | 77                  | 5390                 | 5393                   |
| n               |   | 67                  | 5368                 | 5371                   |
| o               |   | 0                   | 5383                 | 5211/5193 <sup>§</sup> |
| p               |   | 0                   | 5378                 | 5211/5193 <sup>§</sup> |
| q               |   | 0                   | 5386                 | 5211/5193 <sup>§</sup> |
| r               |   | 0                   | 5384                 | 5211/5193 <sup>§</sup> |
| s               |   | 0                   | 5330                 | 5211/5193 <sup>§</sup> |
| t               |   | 0                   | 5356                 | 5211/5193 <sup>§</sup> |
| u               |   | 0                   | 5370                 | 5211/5193 <sup>§</sup> |

<sup>#</sup> Reaction performed with isolated azomethine imine. <sup>§</sup> Masses of observed main species in agreement with water addition to strained allene or ketone (from triflate hydrolysis/desilylation), req. 5208 Da, found 5211 Da), and diene (likely isomerized strained allene), req. 5190 Da, found 5193 Da.

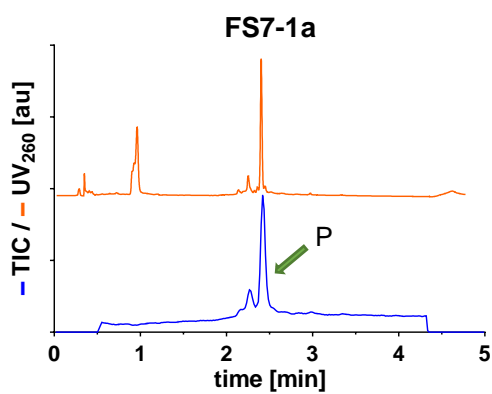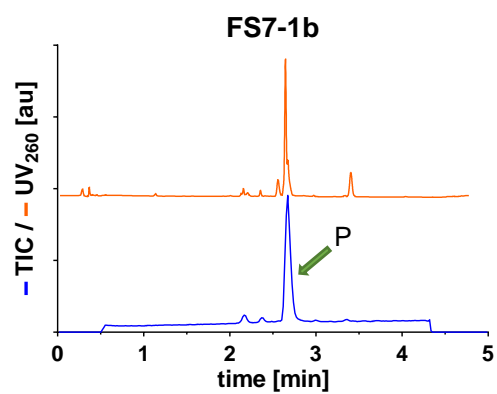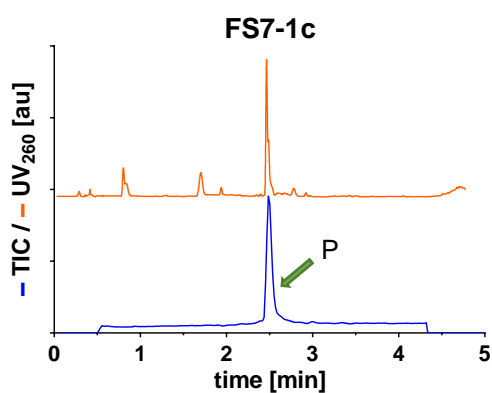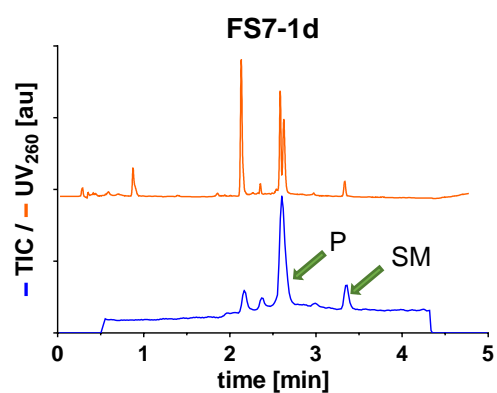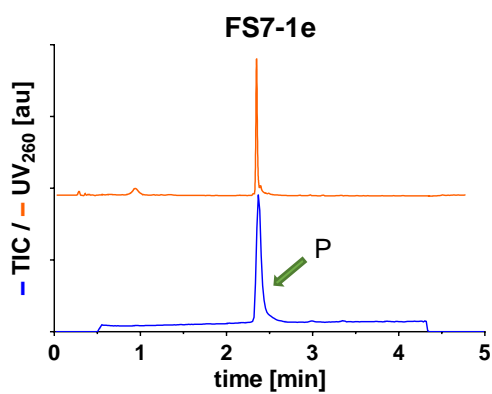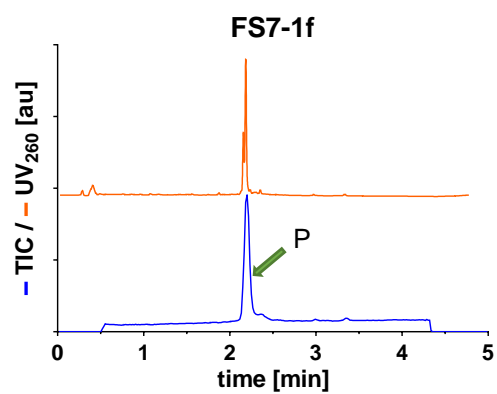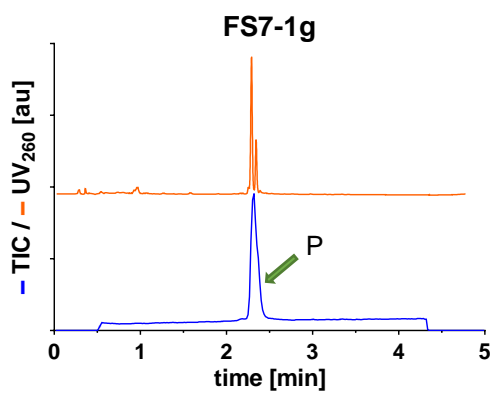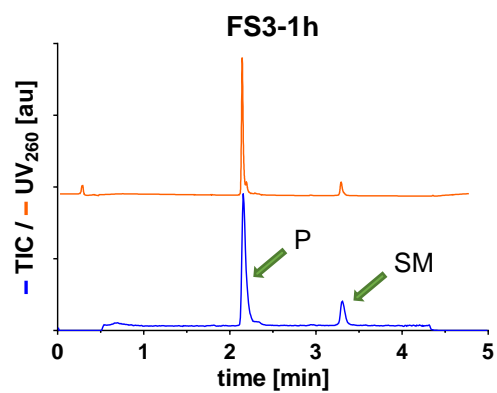

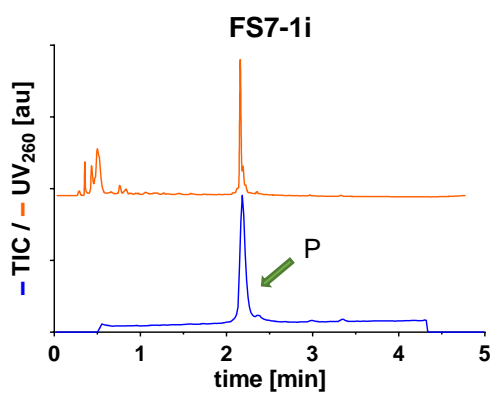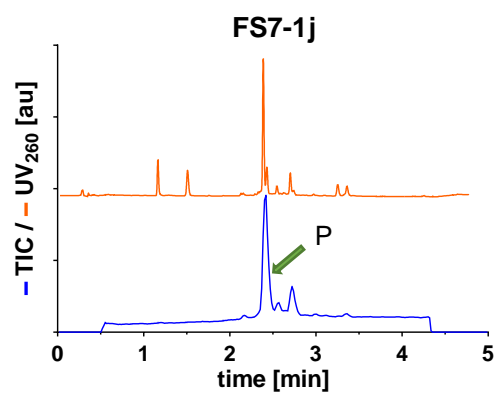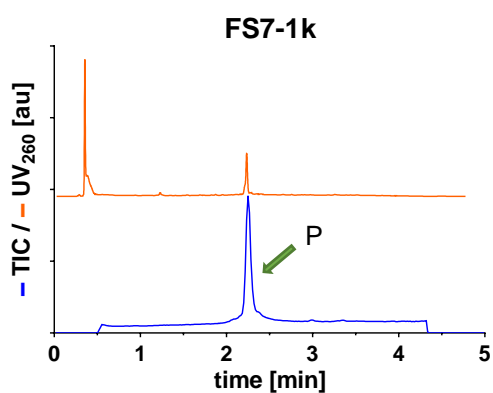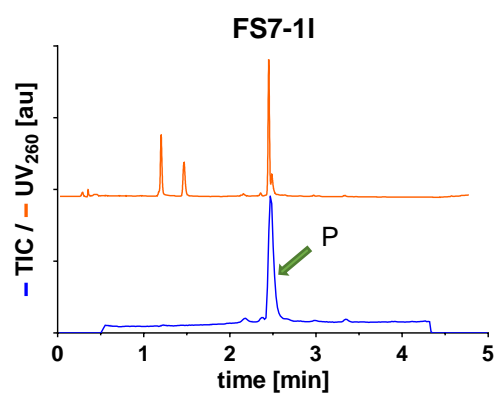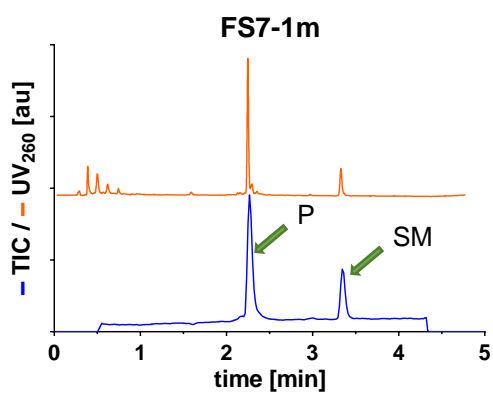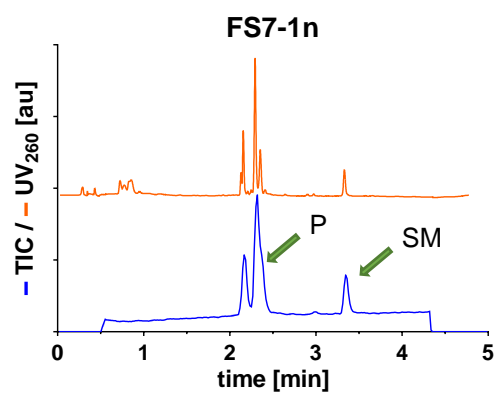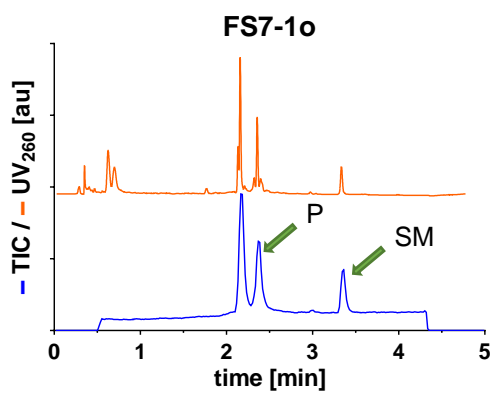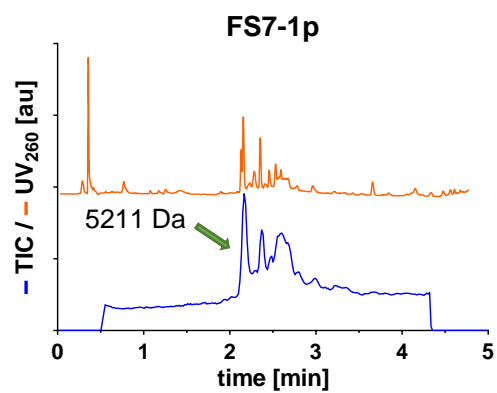

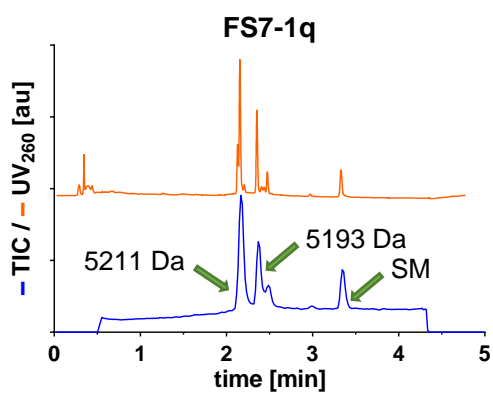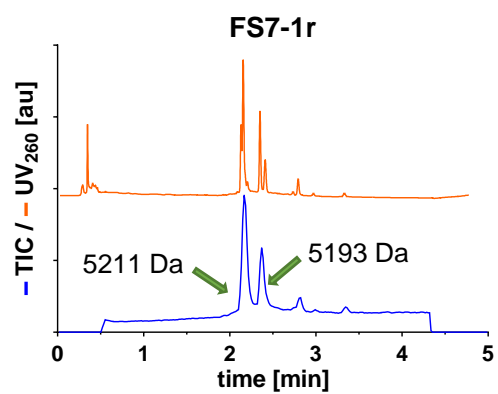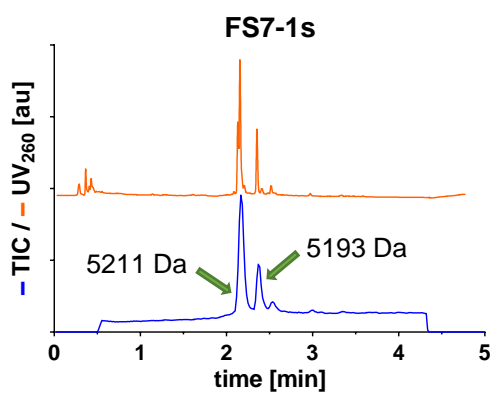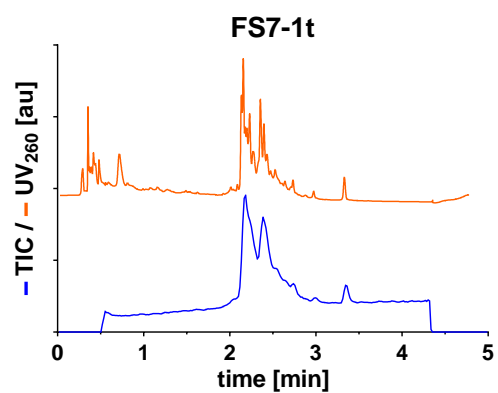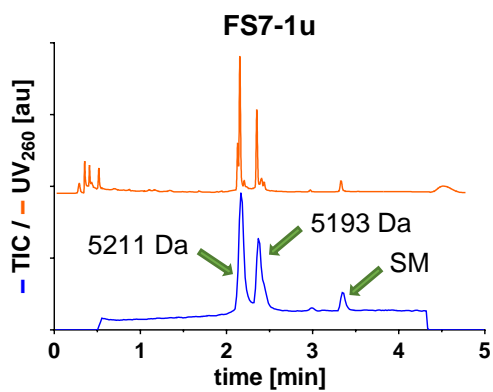

**Table S8.** Analytical data obtained for DNA-conjugates described in Figure S5.

| 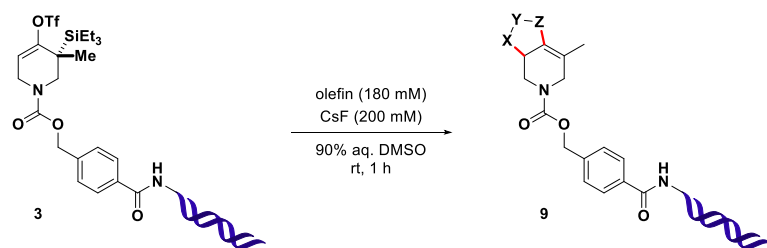 |                                                                                     |                |                      |                      |
|------------------------------------------------------------------------------------|-------------------------------------------------------------------------------------|----------------|----------------------|----------------------|
| BB in Figure S5                                                                    | R                                                                                   | product [%AUC] | calculated mass [Da] | found (MaxEnt1) [Da] |
| S9a                                                                                | 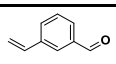   | >95            | 5322                 | 5323                 |
| S9b                                                                                | 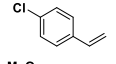   | >95            | 5328                 | 5330                 |
| S9c                                                                                | 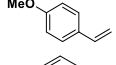   | >95            | 5324                 | 5326                 |
| S9d                                                                                | 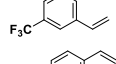   | 95             | 5362                 | 5364                 |
| S9e                                                                                | 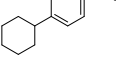   | >95            | 5376                 | 5378                 |
| S9f                                                                                | 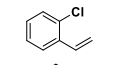   | >95            | 5328                 | 5329                 |
| S9g                                                                                | 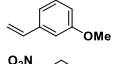   | >95            | 5324                 | 5326                 |
| S9h                                                                                | 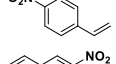  | >95            | 5339                 | 5341                 |
| S9i                                                                                | 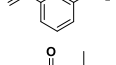 | >95            | 5351                 | 5354                 |
| S9j                                                                                | 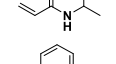 | >95            | 5303                 | 5305                 |
| S9k                                                                                | 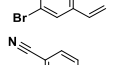 | >95            | 5372                 | 5375                 |
| S9l                                                                                | 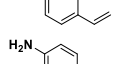 | >95            | 5319                 | 5320                 |
| S9m                                                                                | 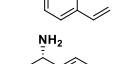 | 95             | 5309                 | 5310                 |
| S9n                                                                                | 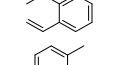 | 90             | 5337                 | 5339                 |
| S9o                                                                                | 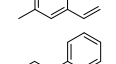 | 95             | 5322                 | 5324                 |
| S9p                                                                                | 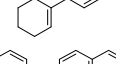 | 81             | 5348                 | 5350                 |
| S9q                                                                                | 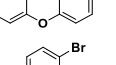 | >95            | 5386                 | 5386                 |
| S9r                                                                                | 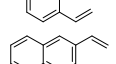 | >95            | 5372                 | 5375                 |
| S9s                                                                                | 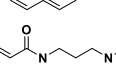 | 86             | 5344                 | 5346                 |
| S9t                                                                                | 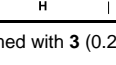 | >95            | 5346                 | 5347                 |

Reactions were performed with **3** (0.25 nmol) under the indicated conditions.

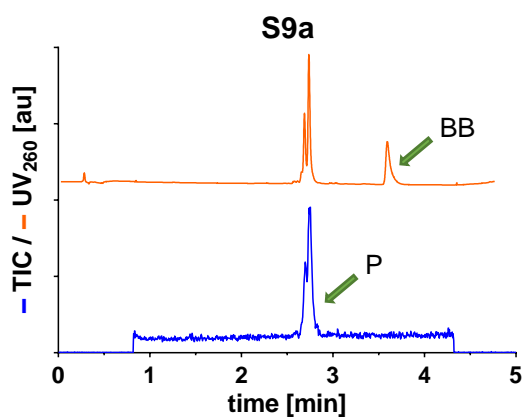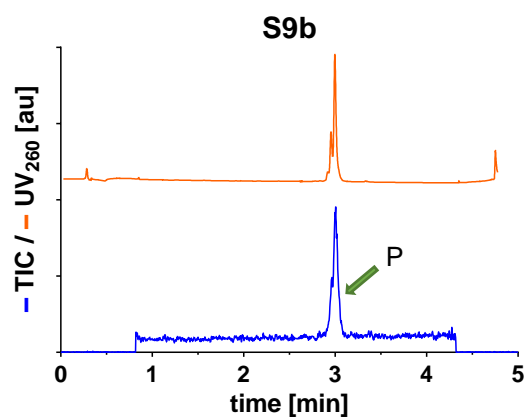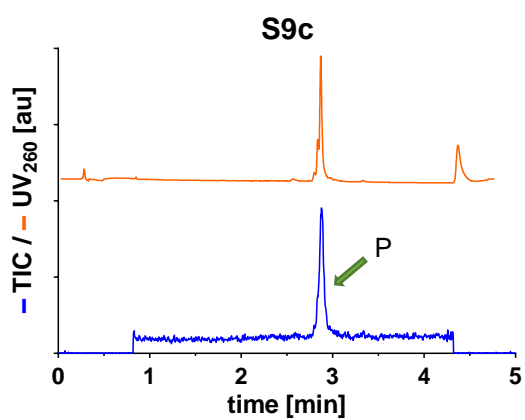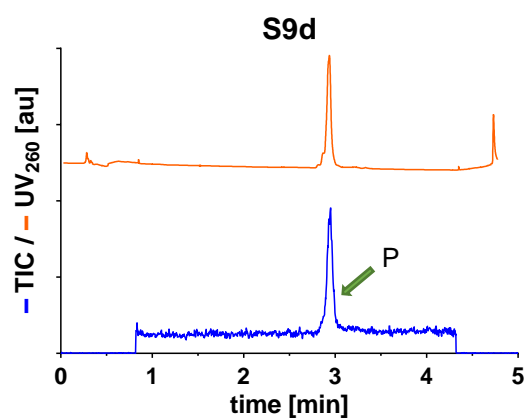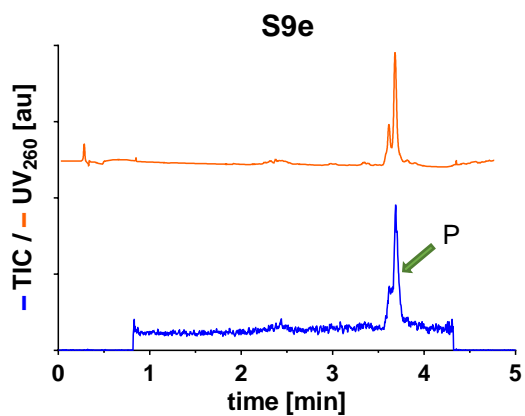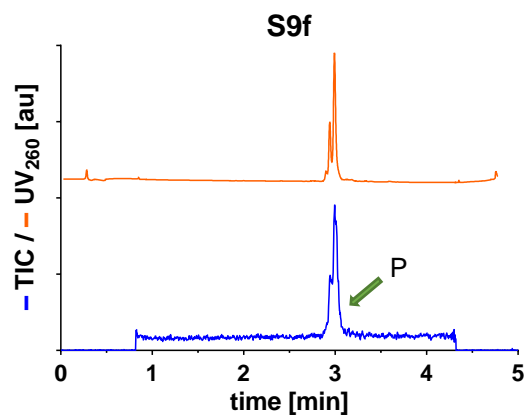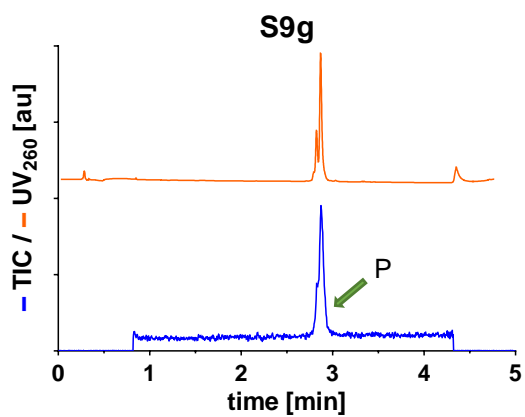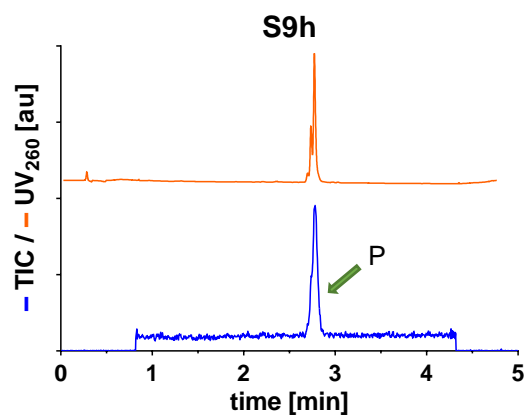

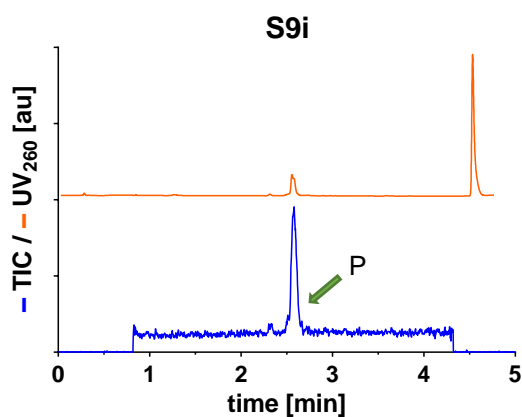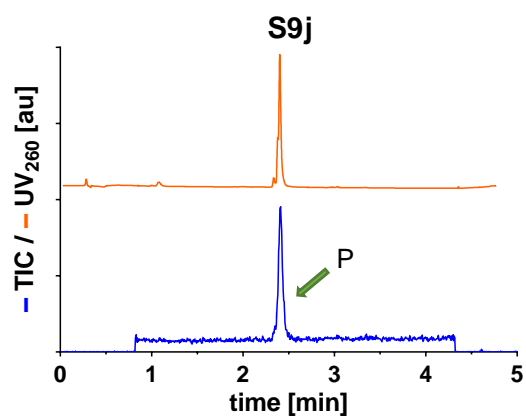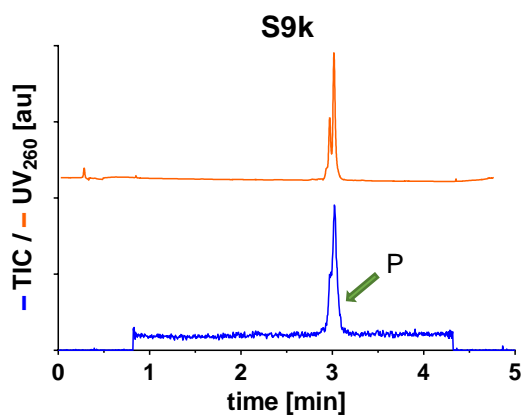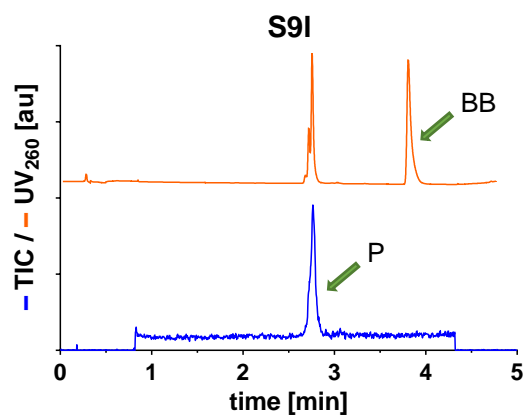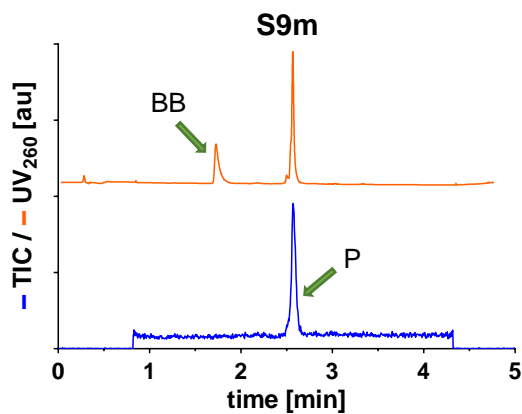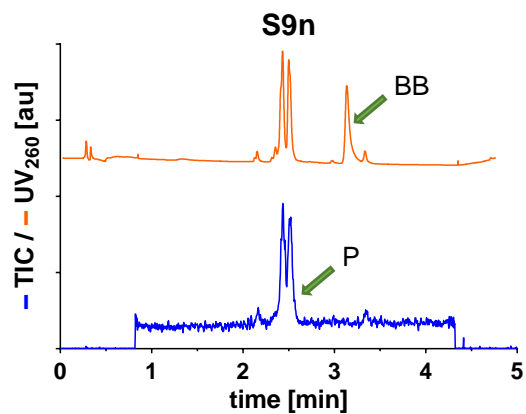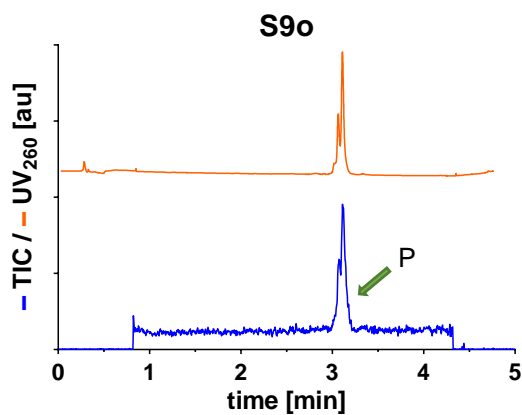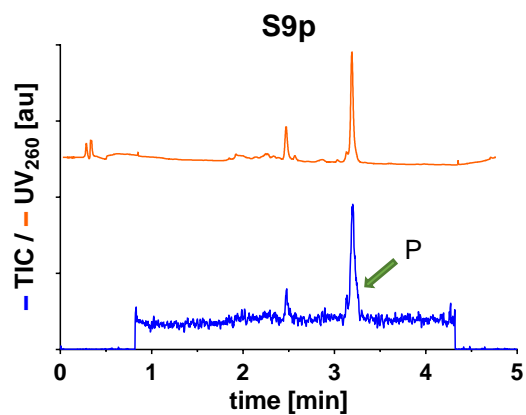

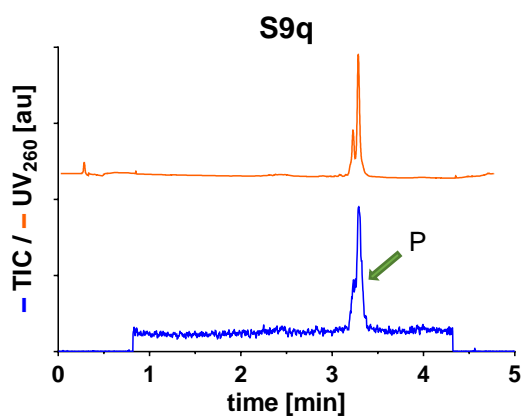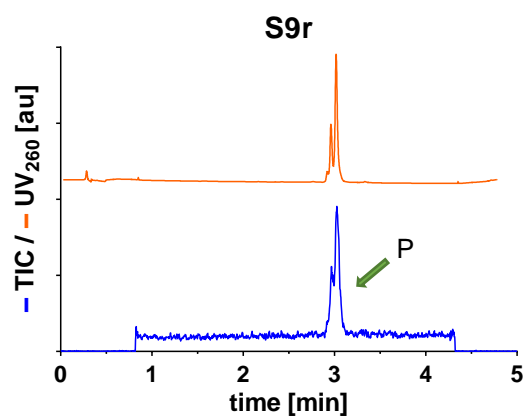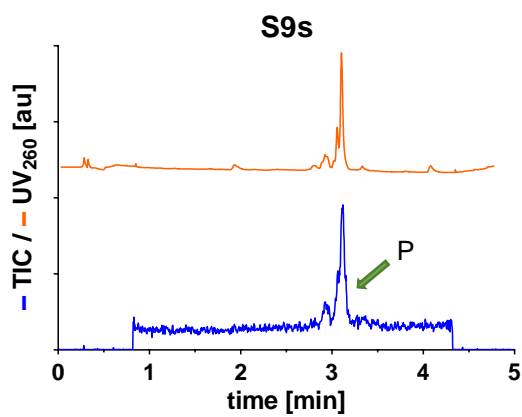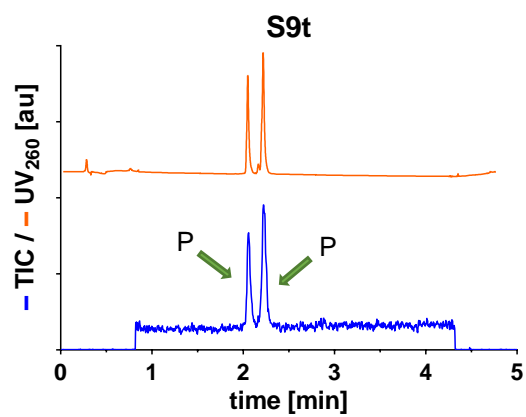

## 6. $^1\text{H}$ and $^{13}\text{C}$ NMR spectra

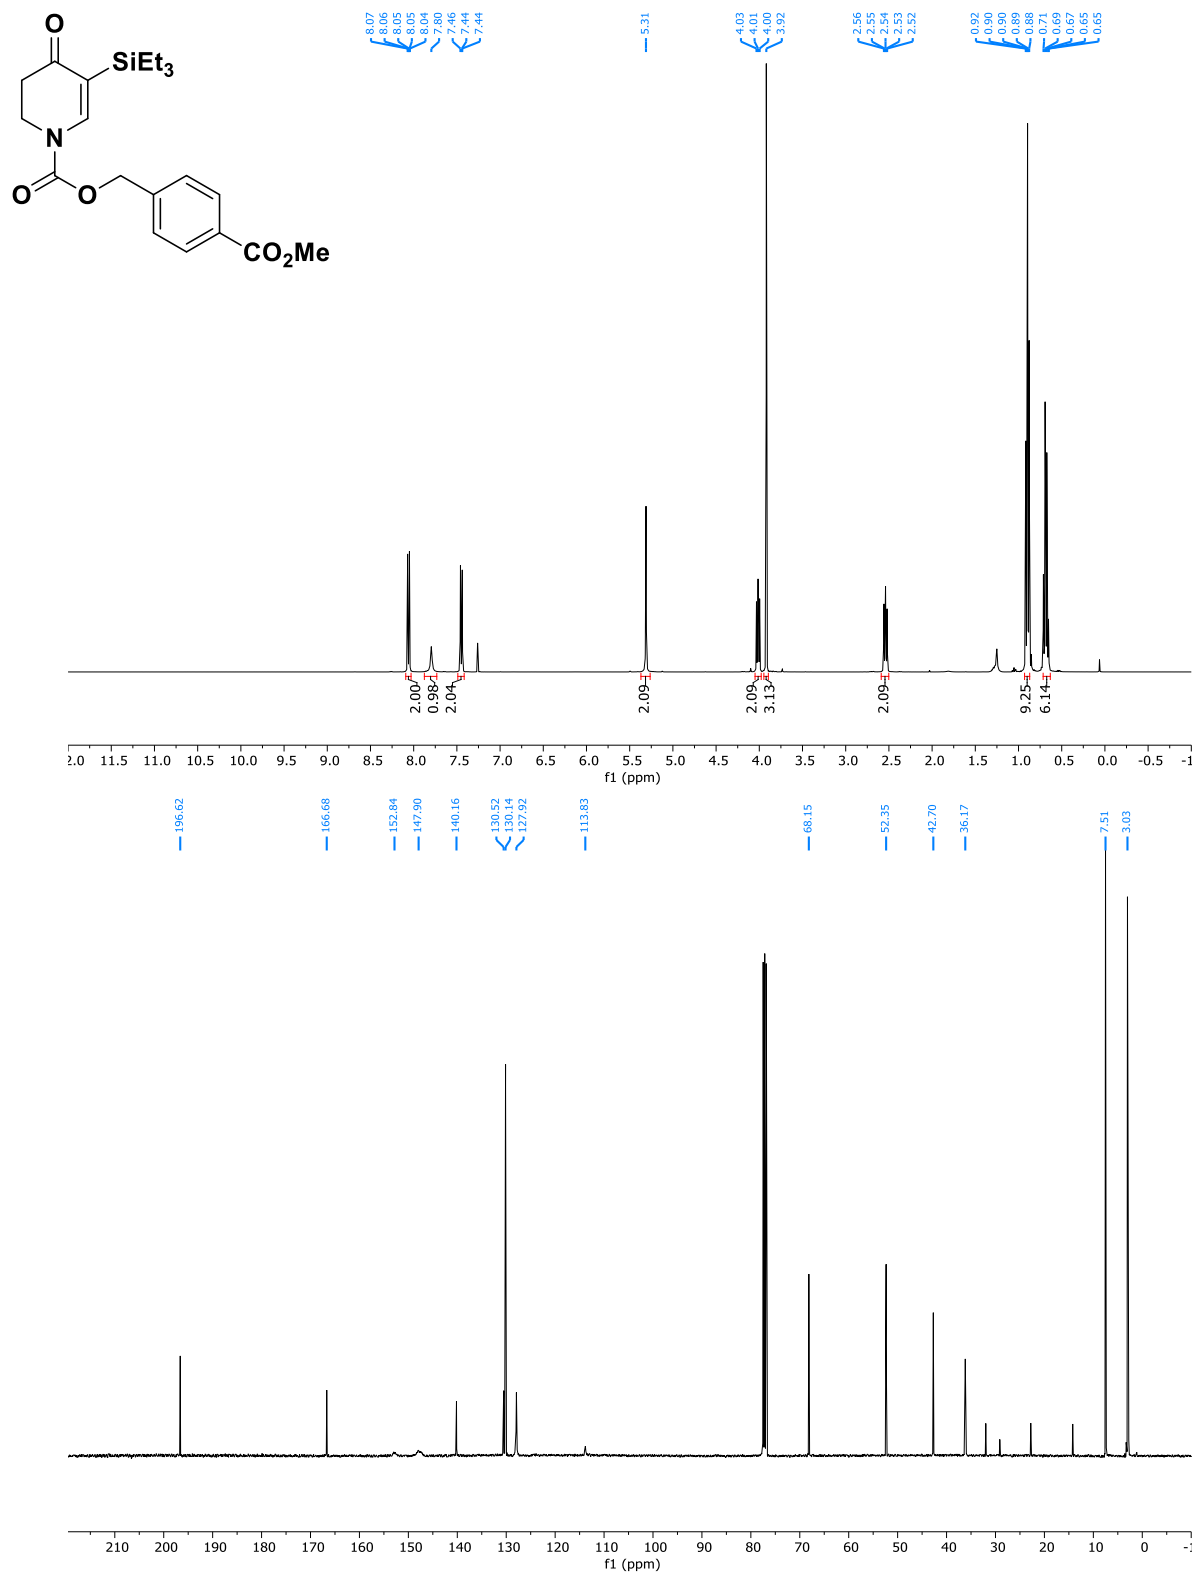

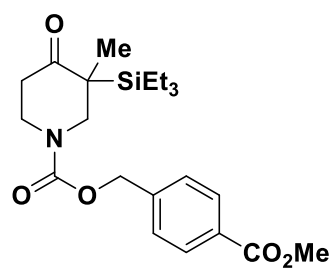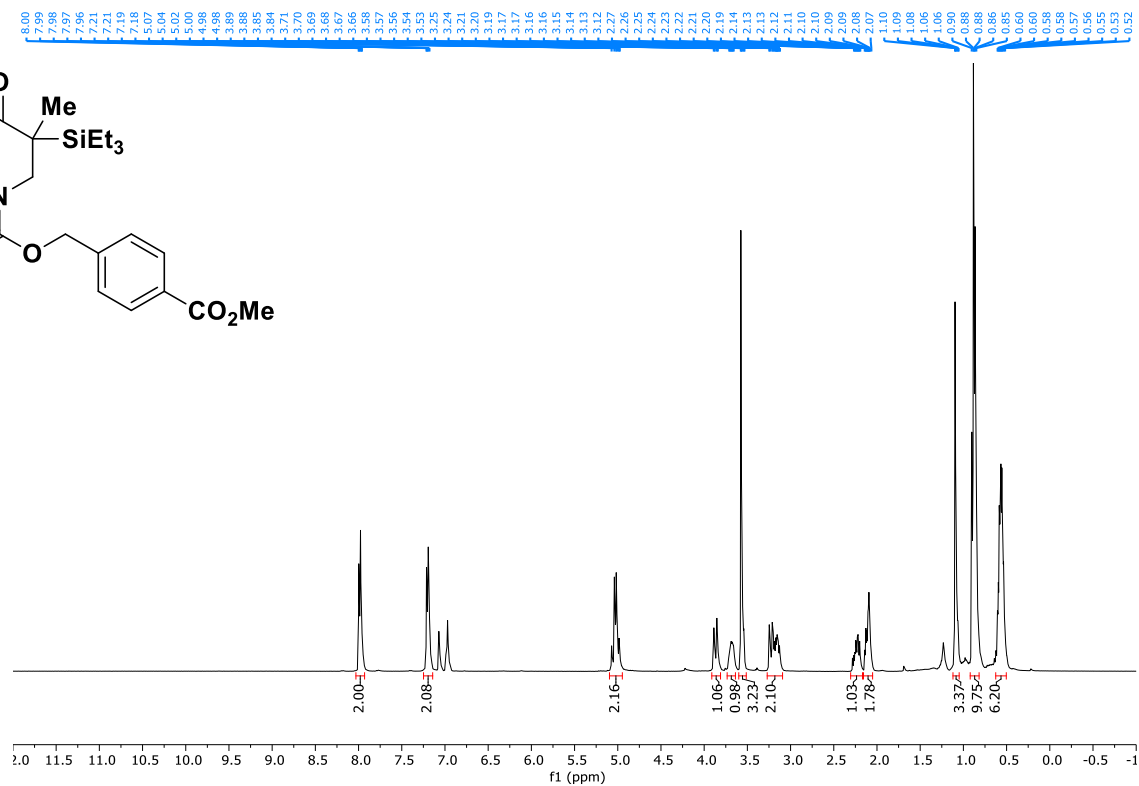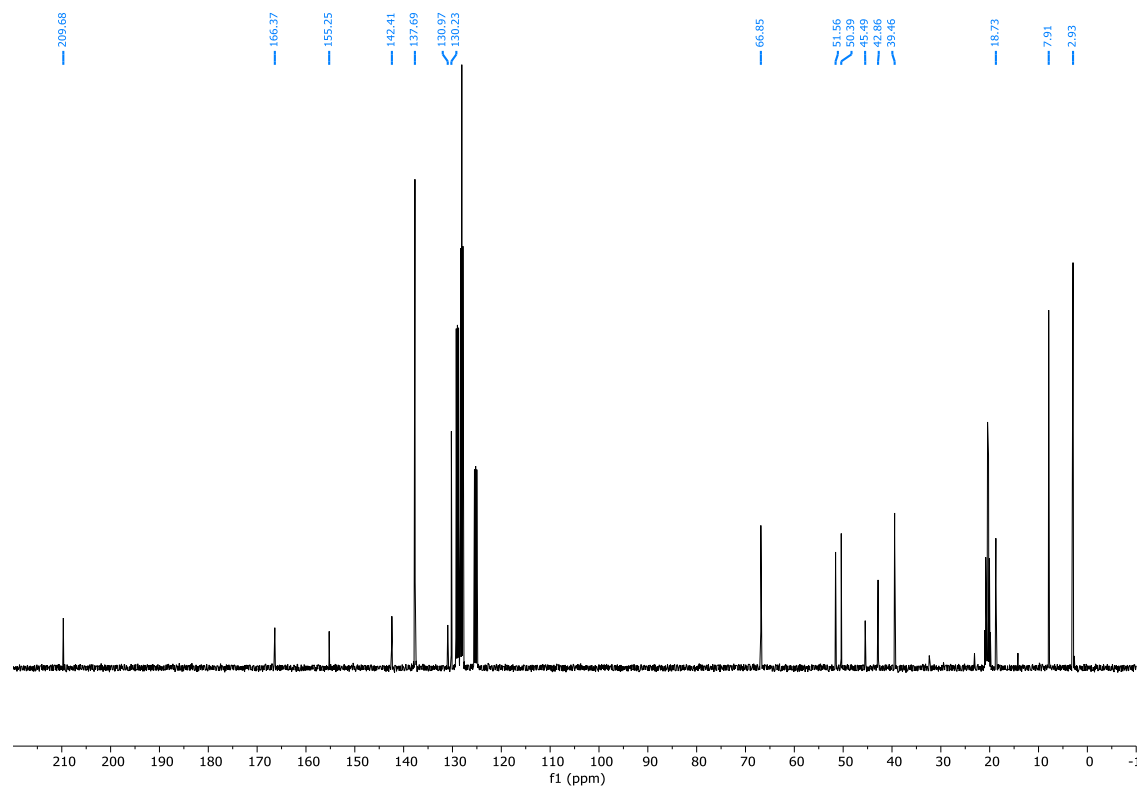

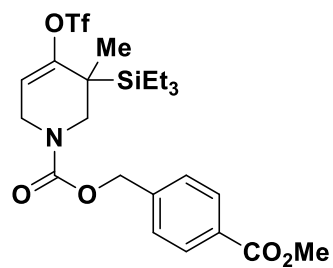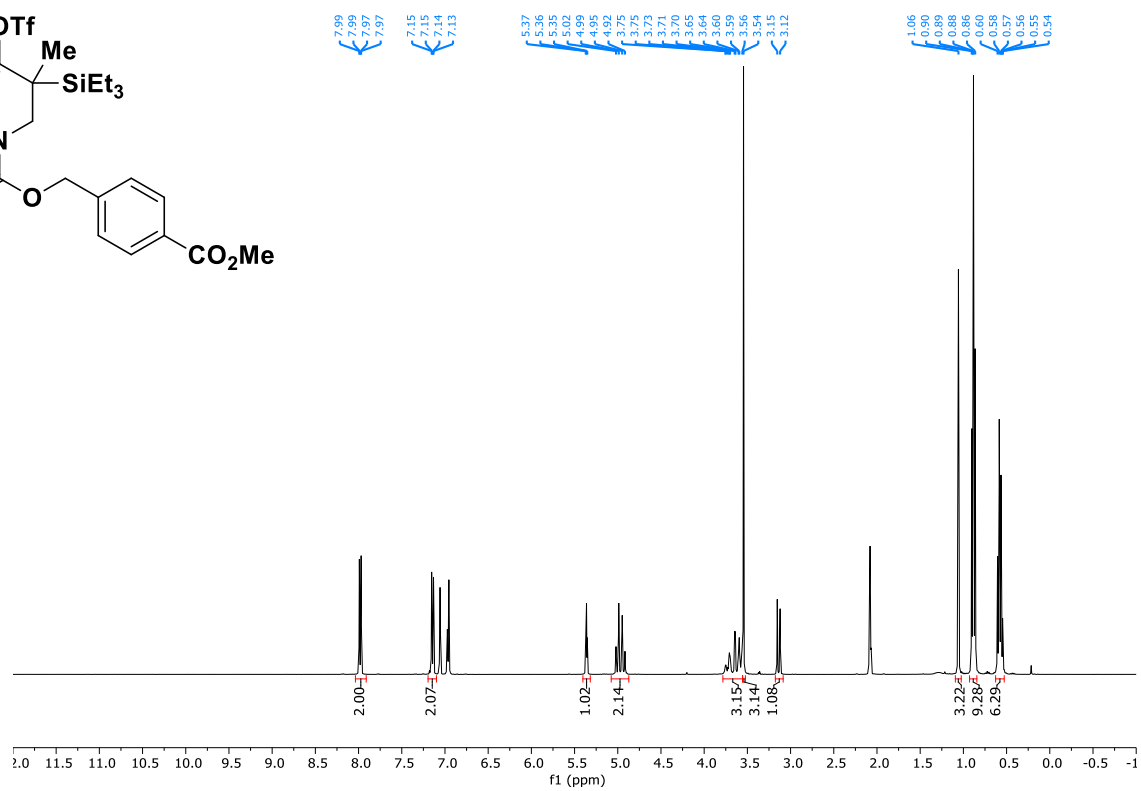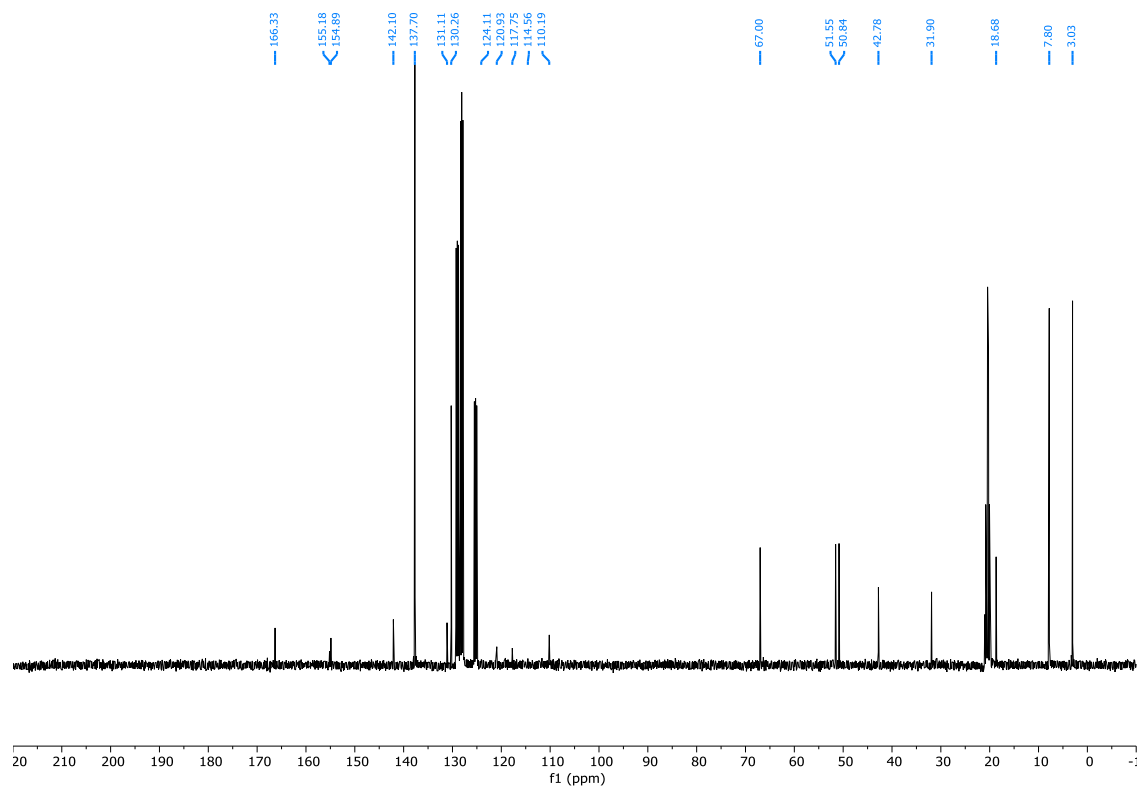

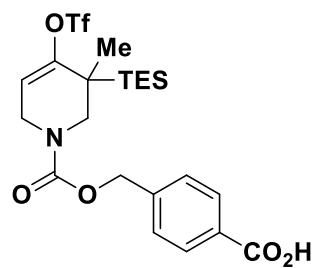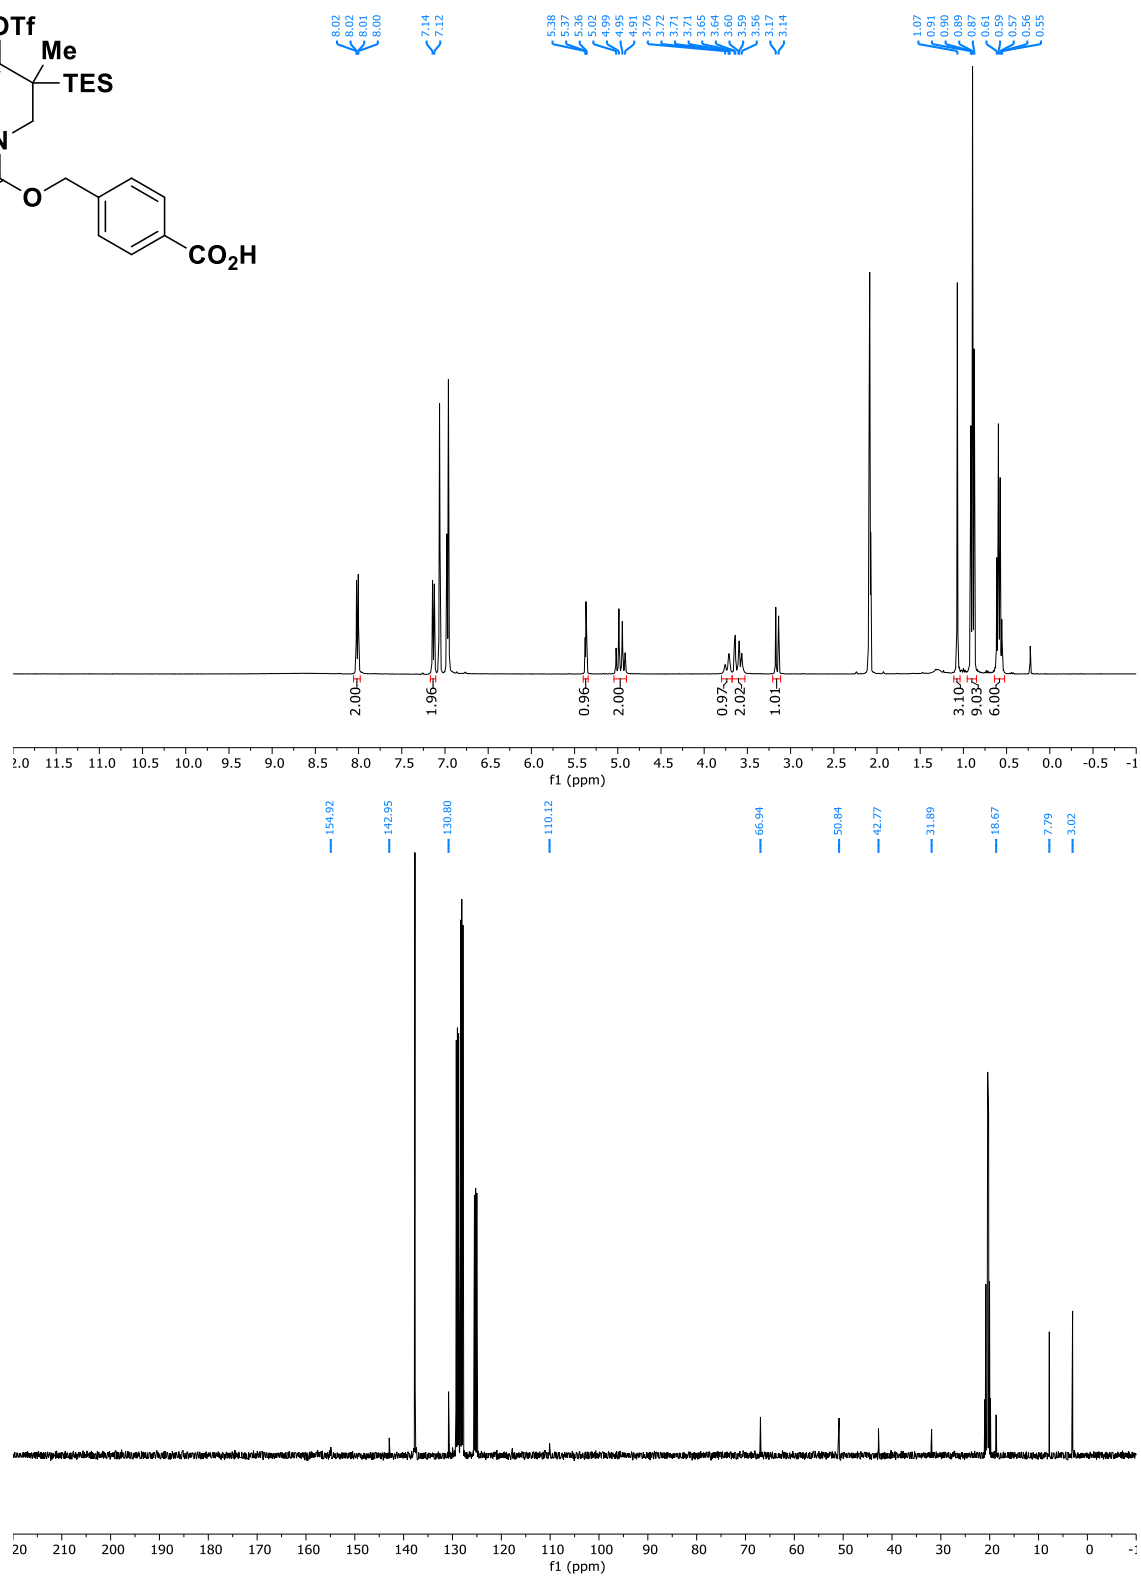

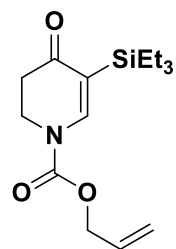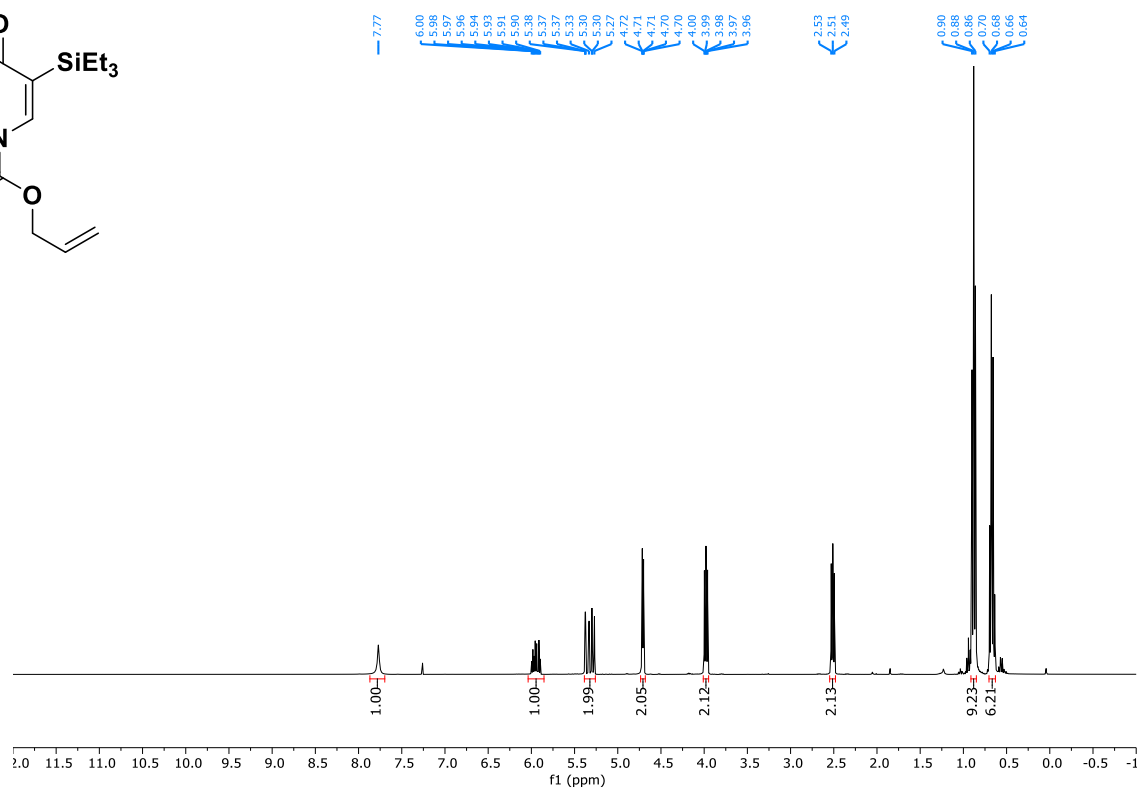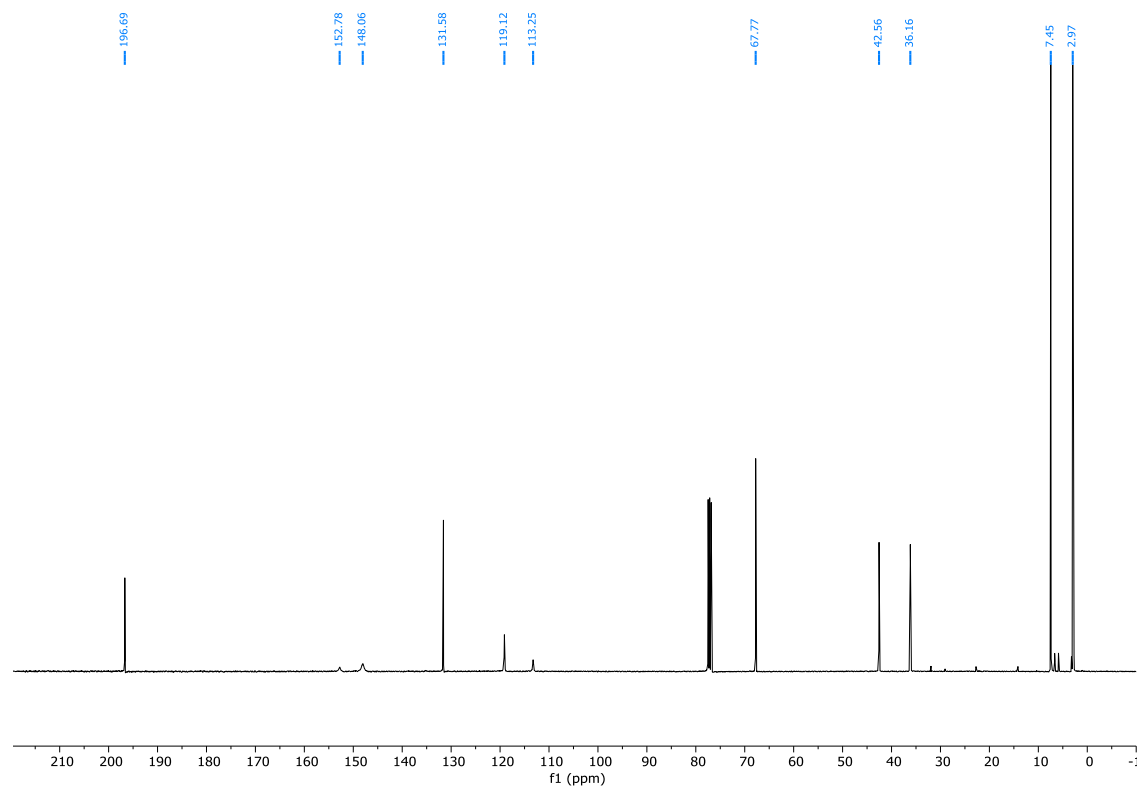

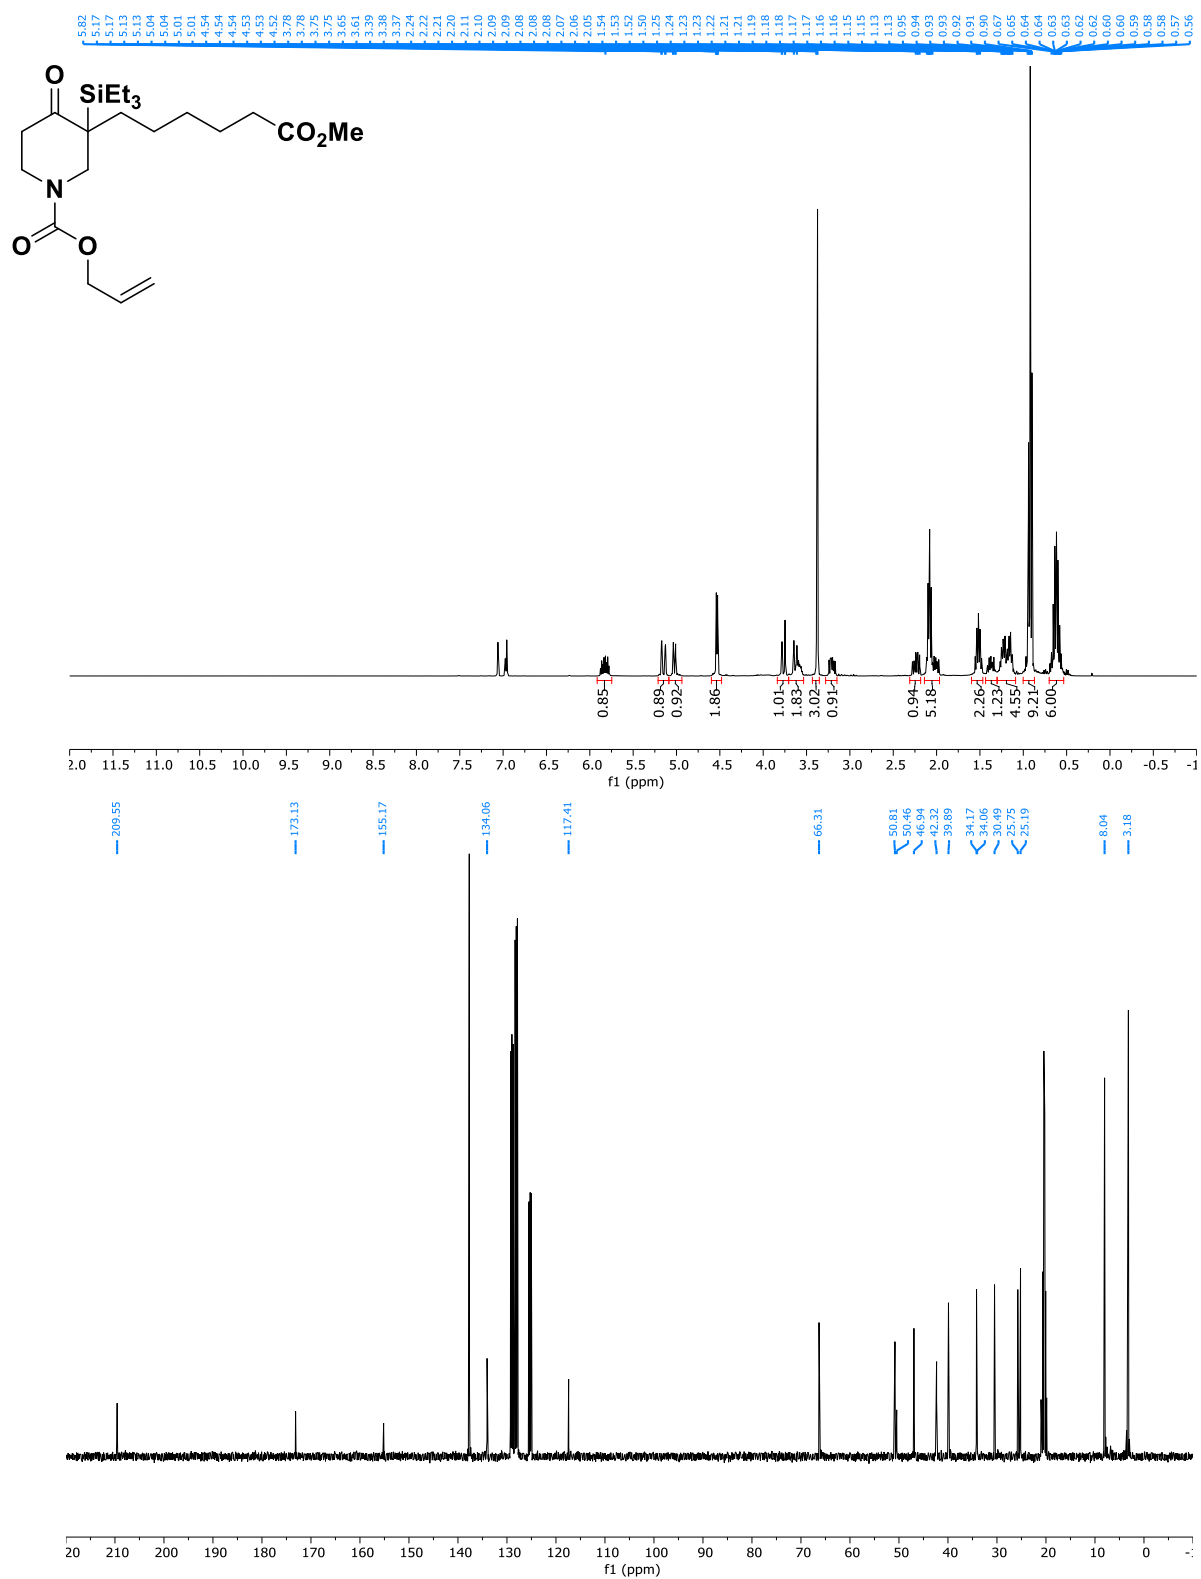

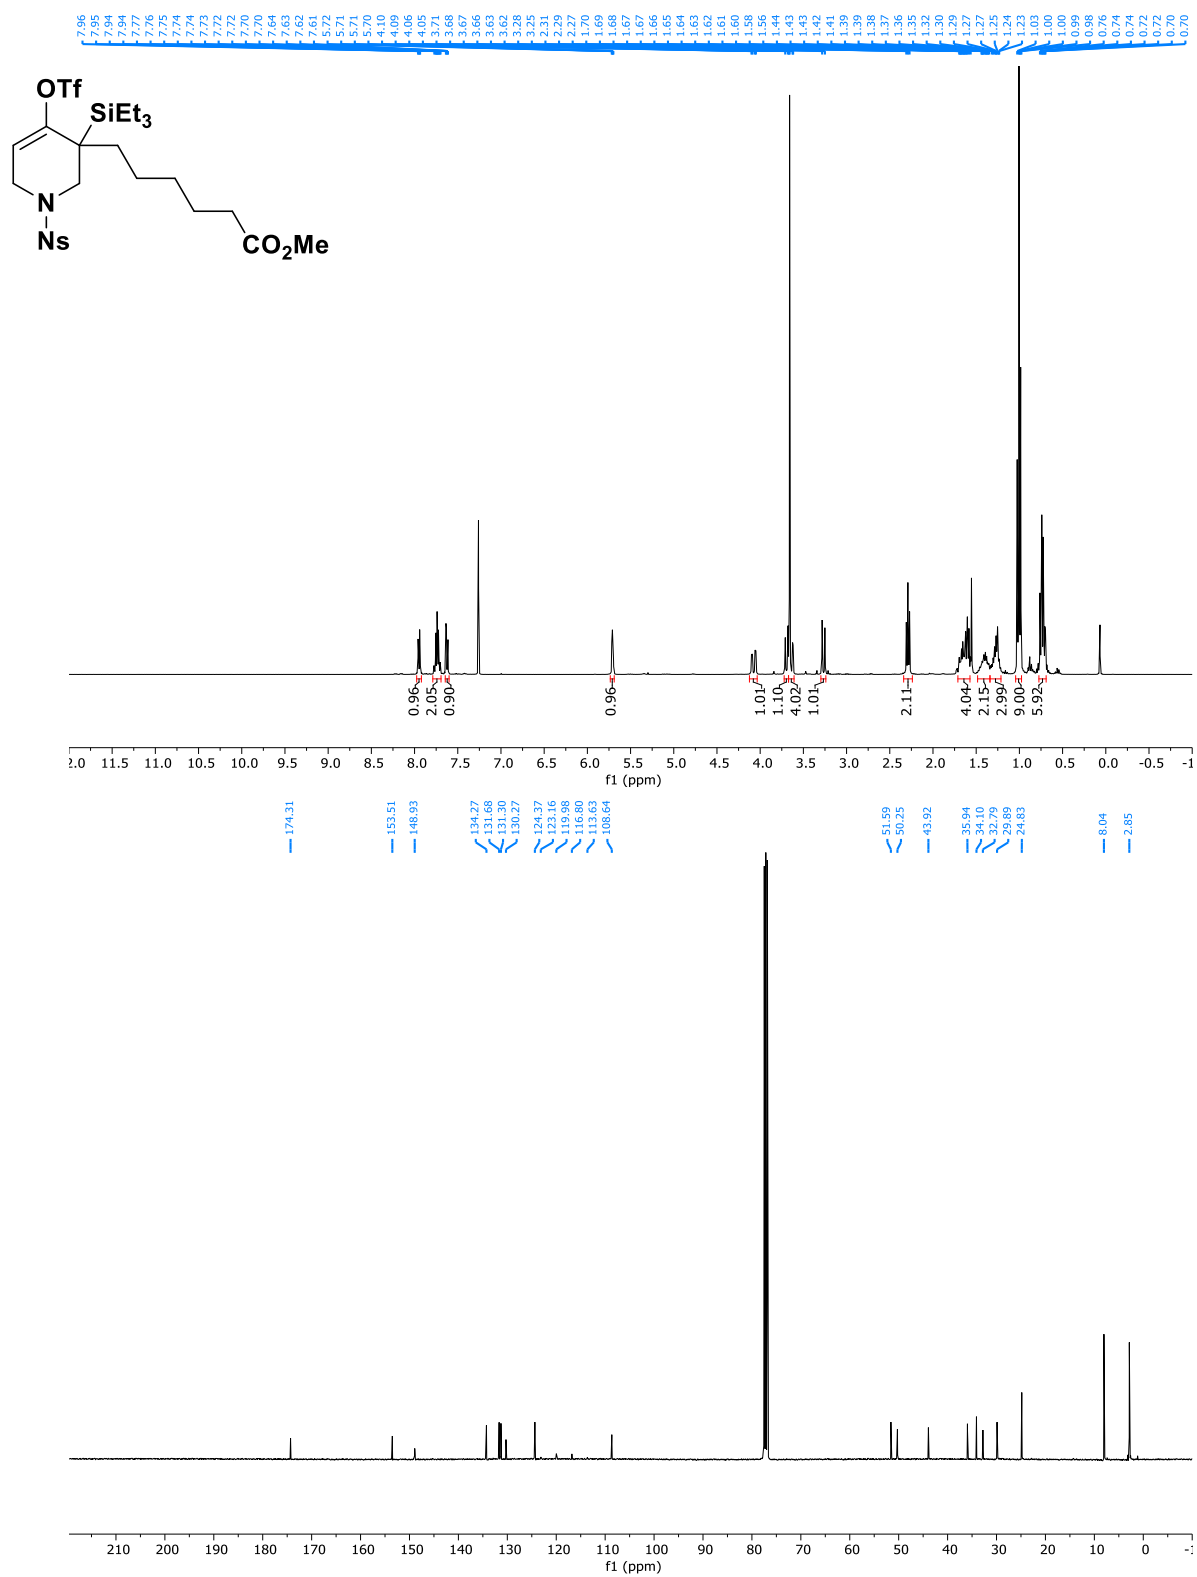

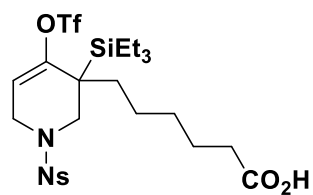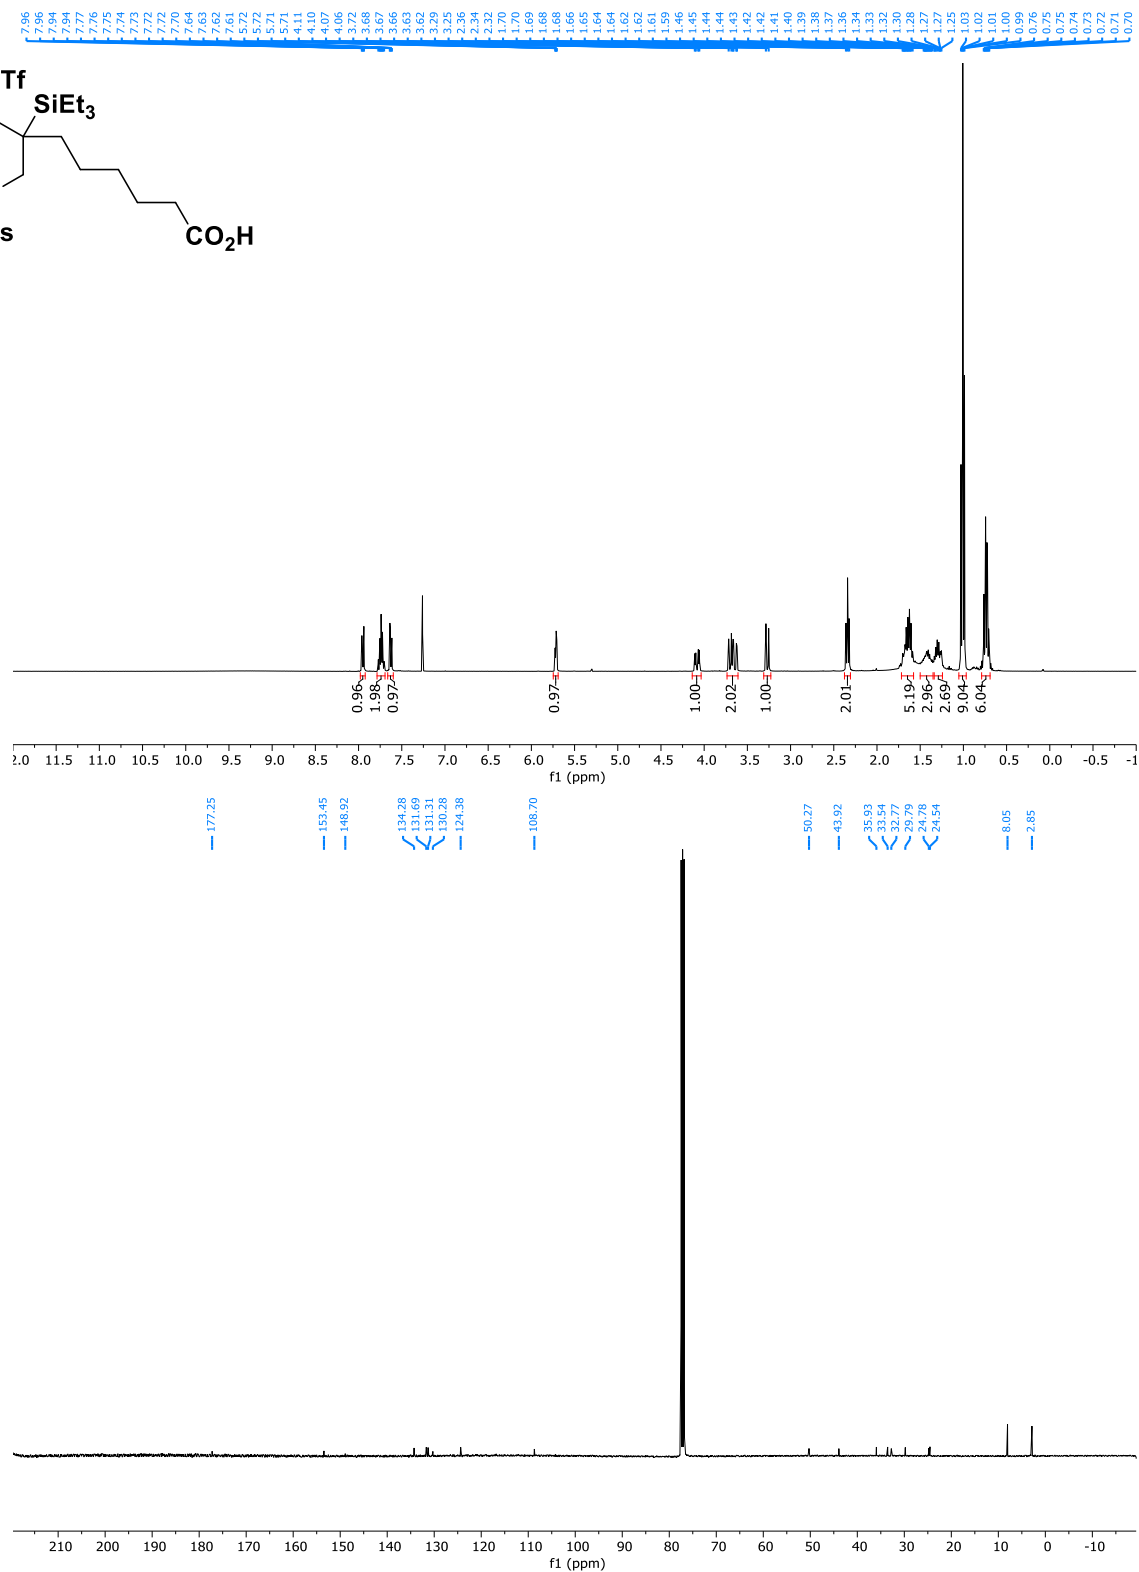

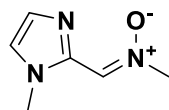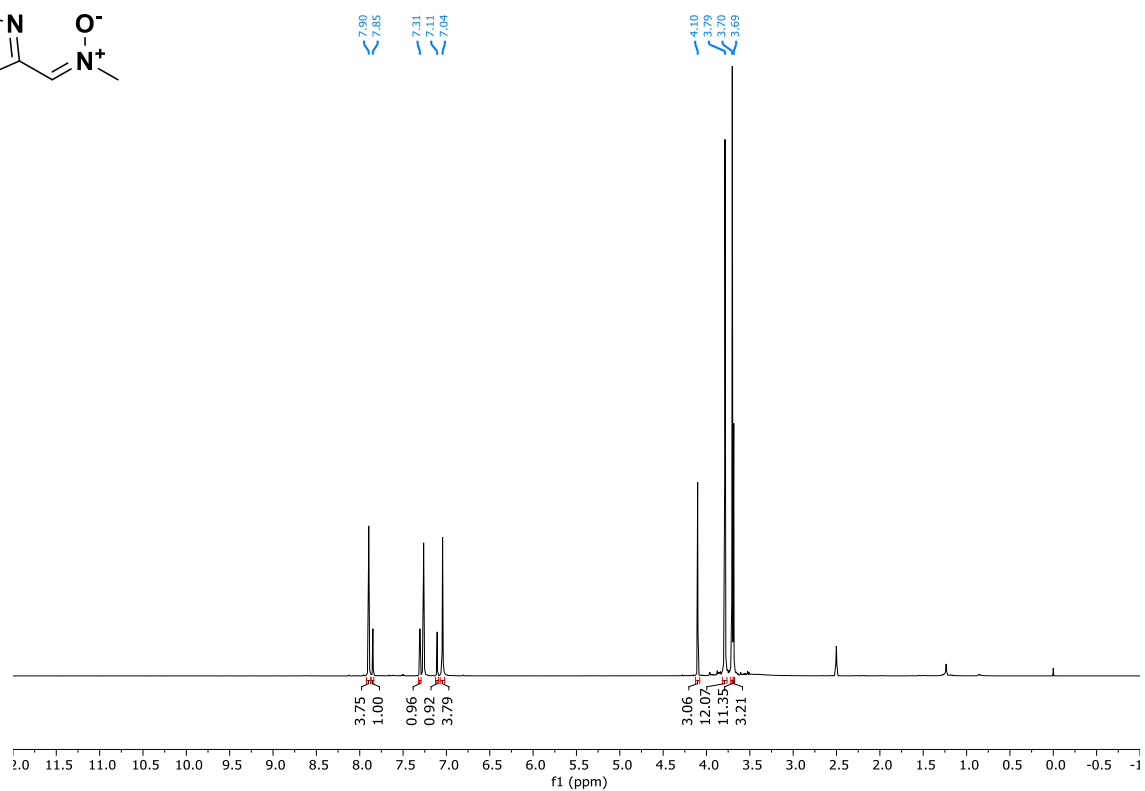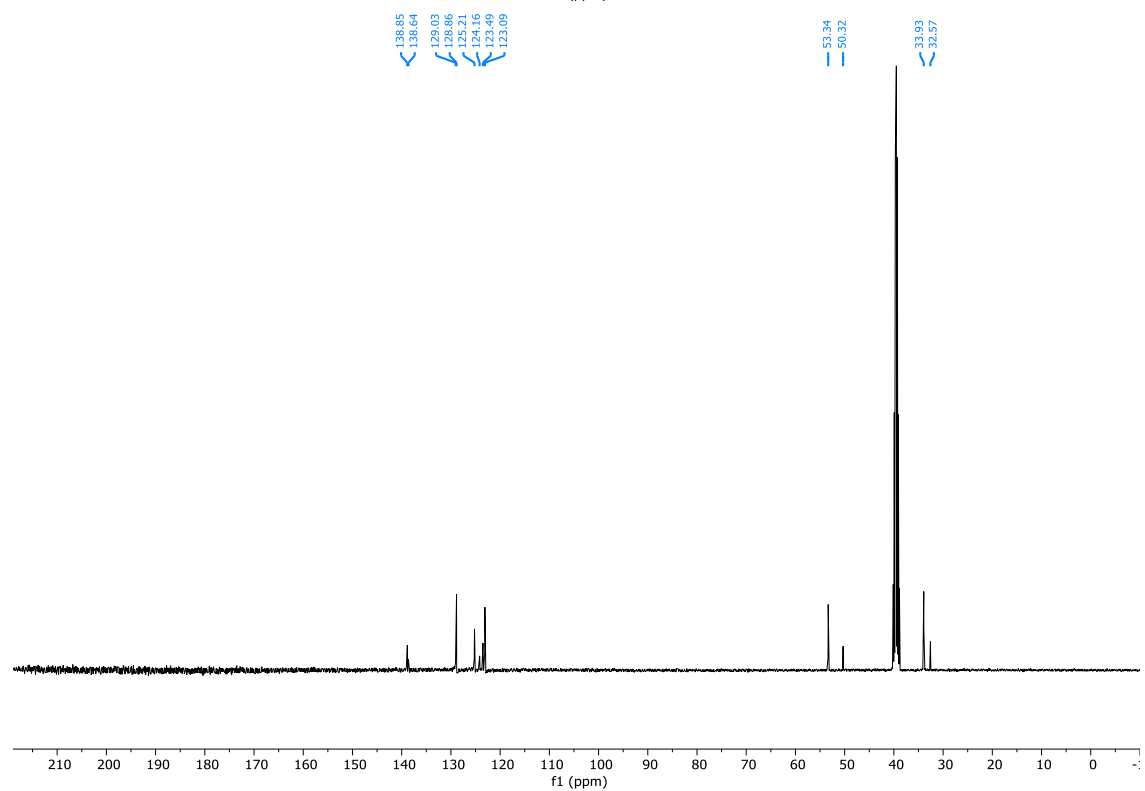

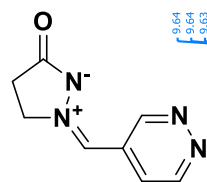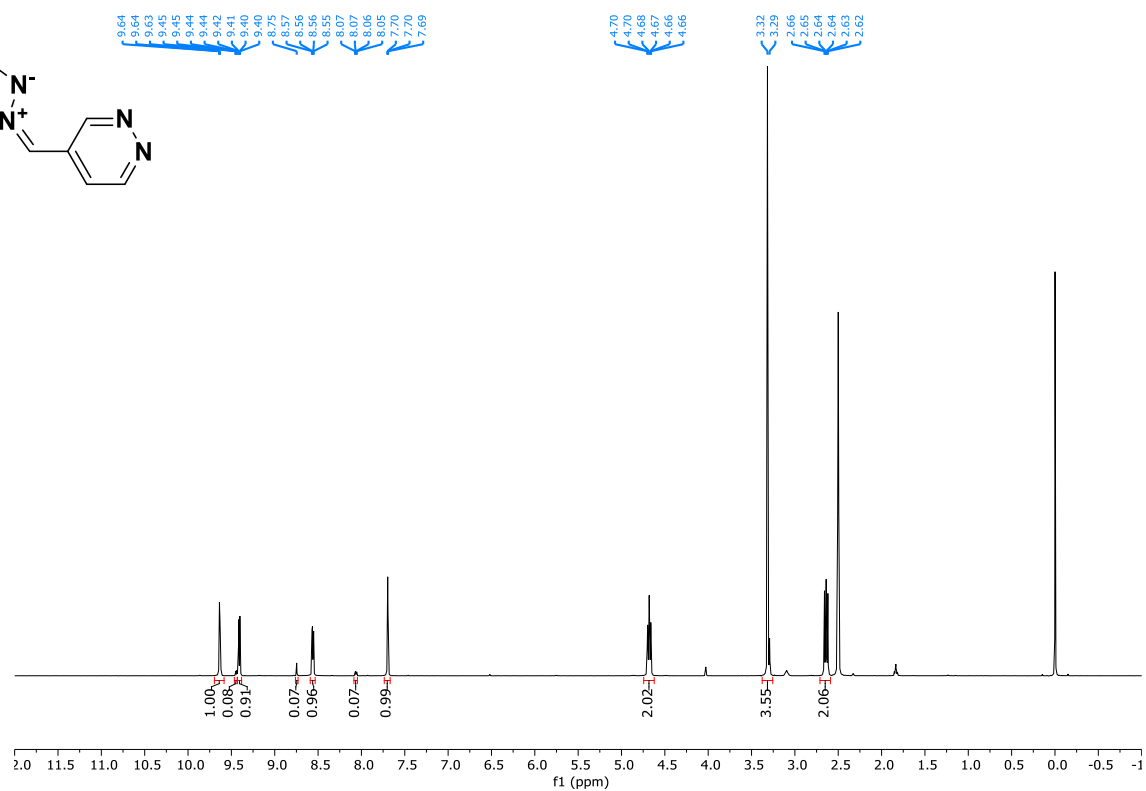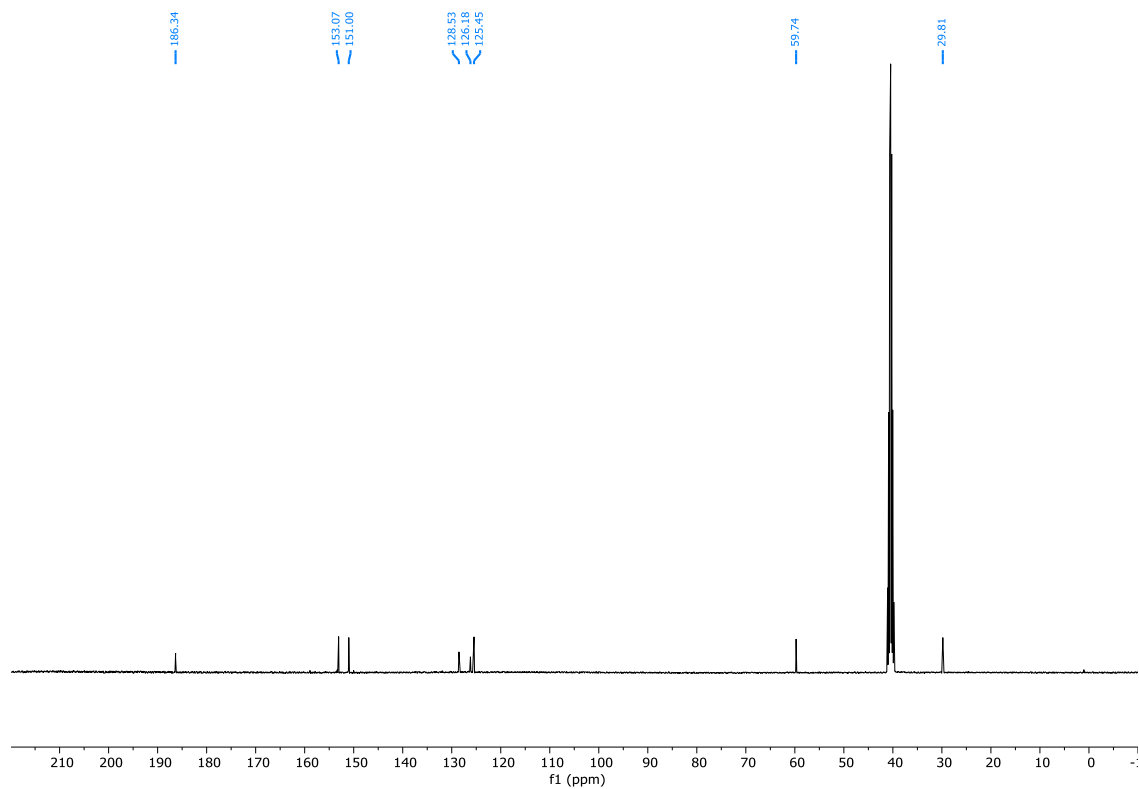

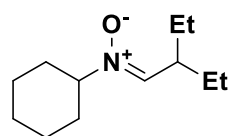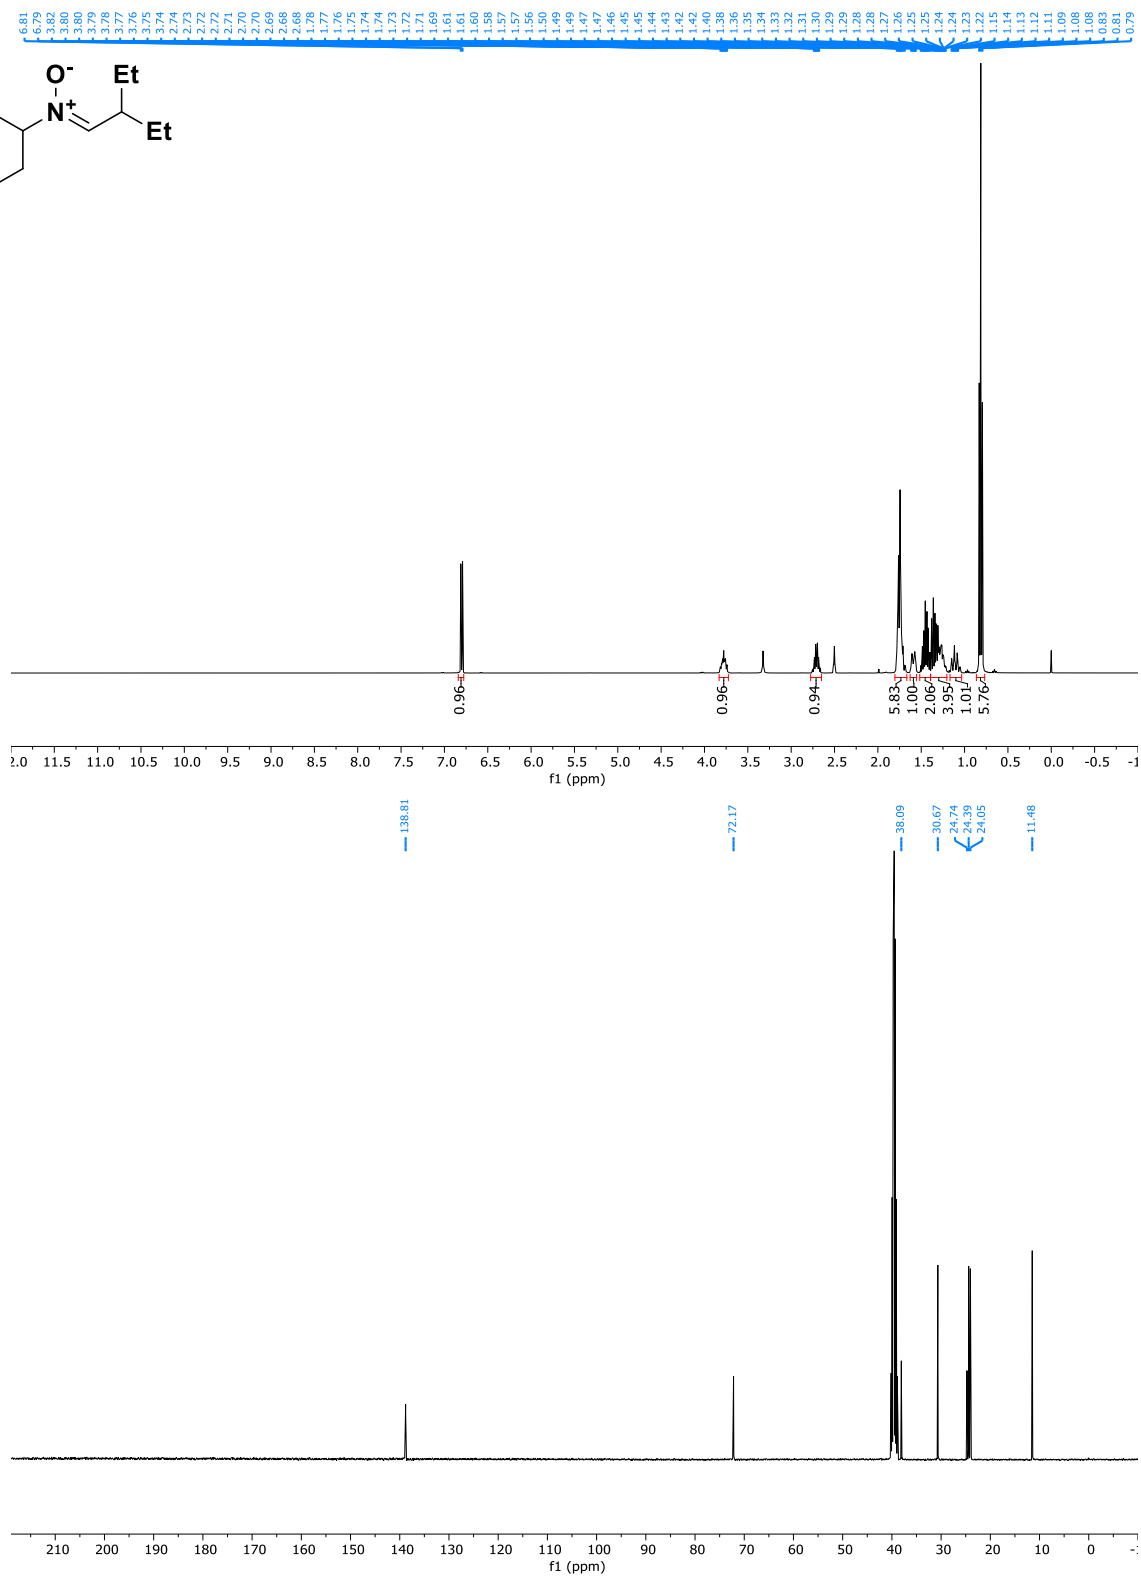

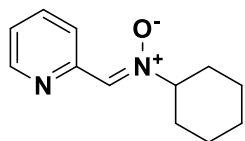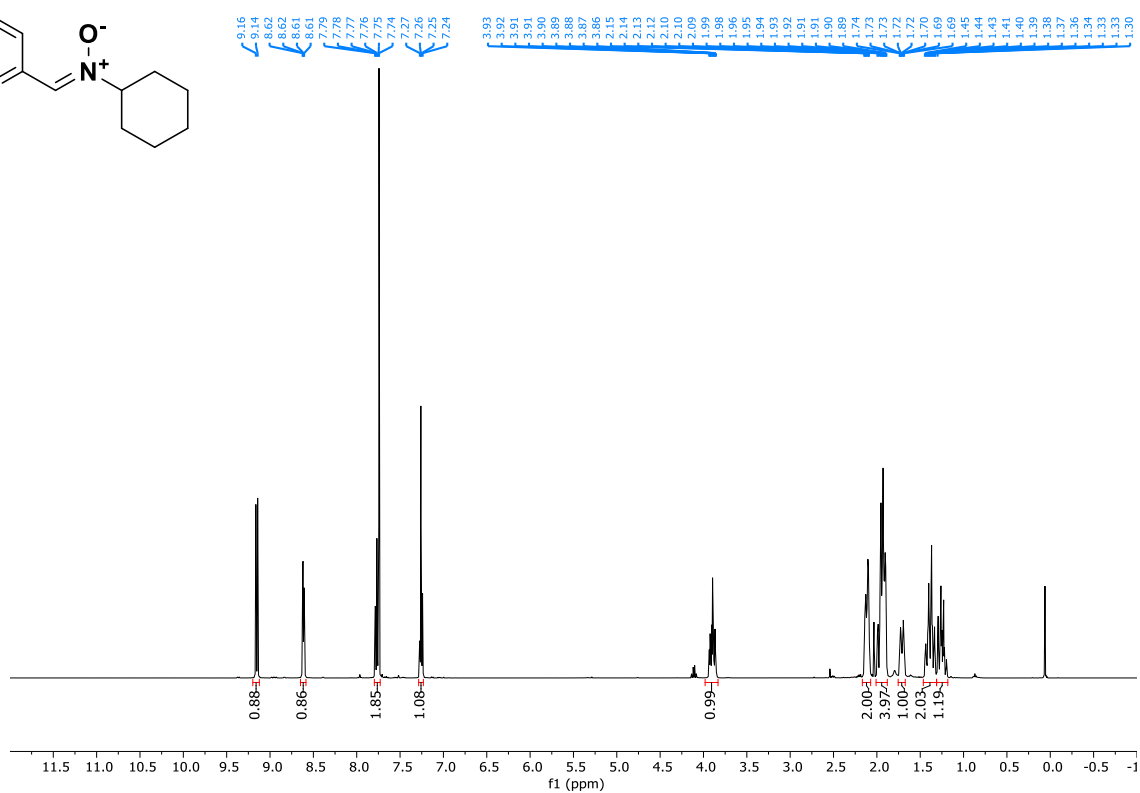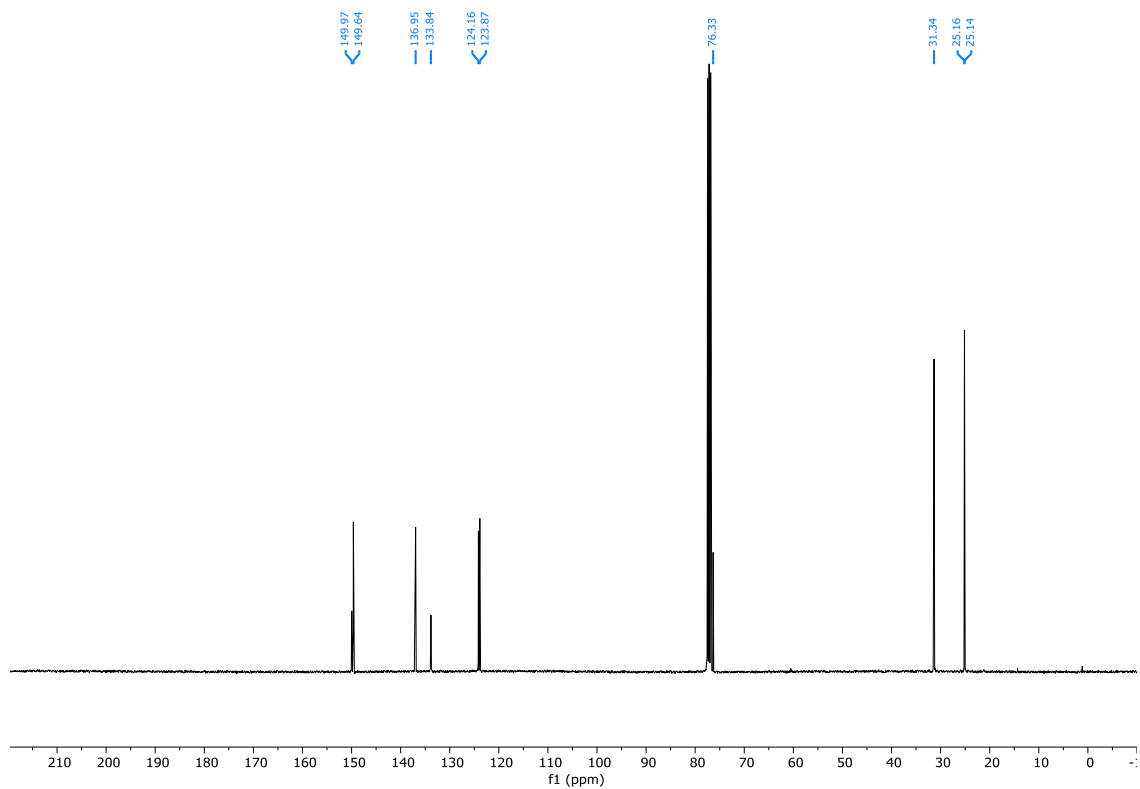

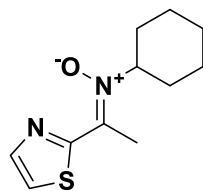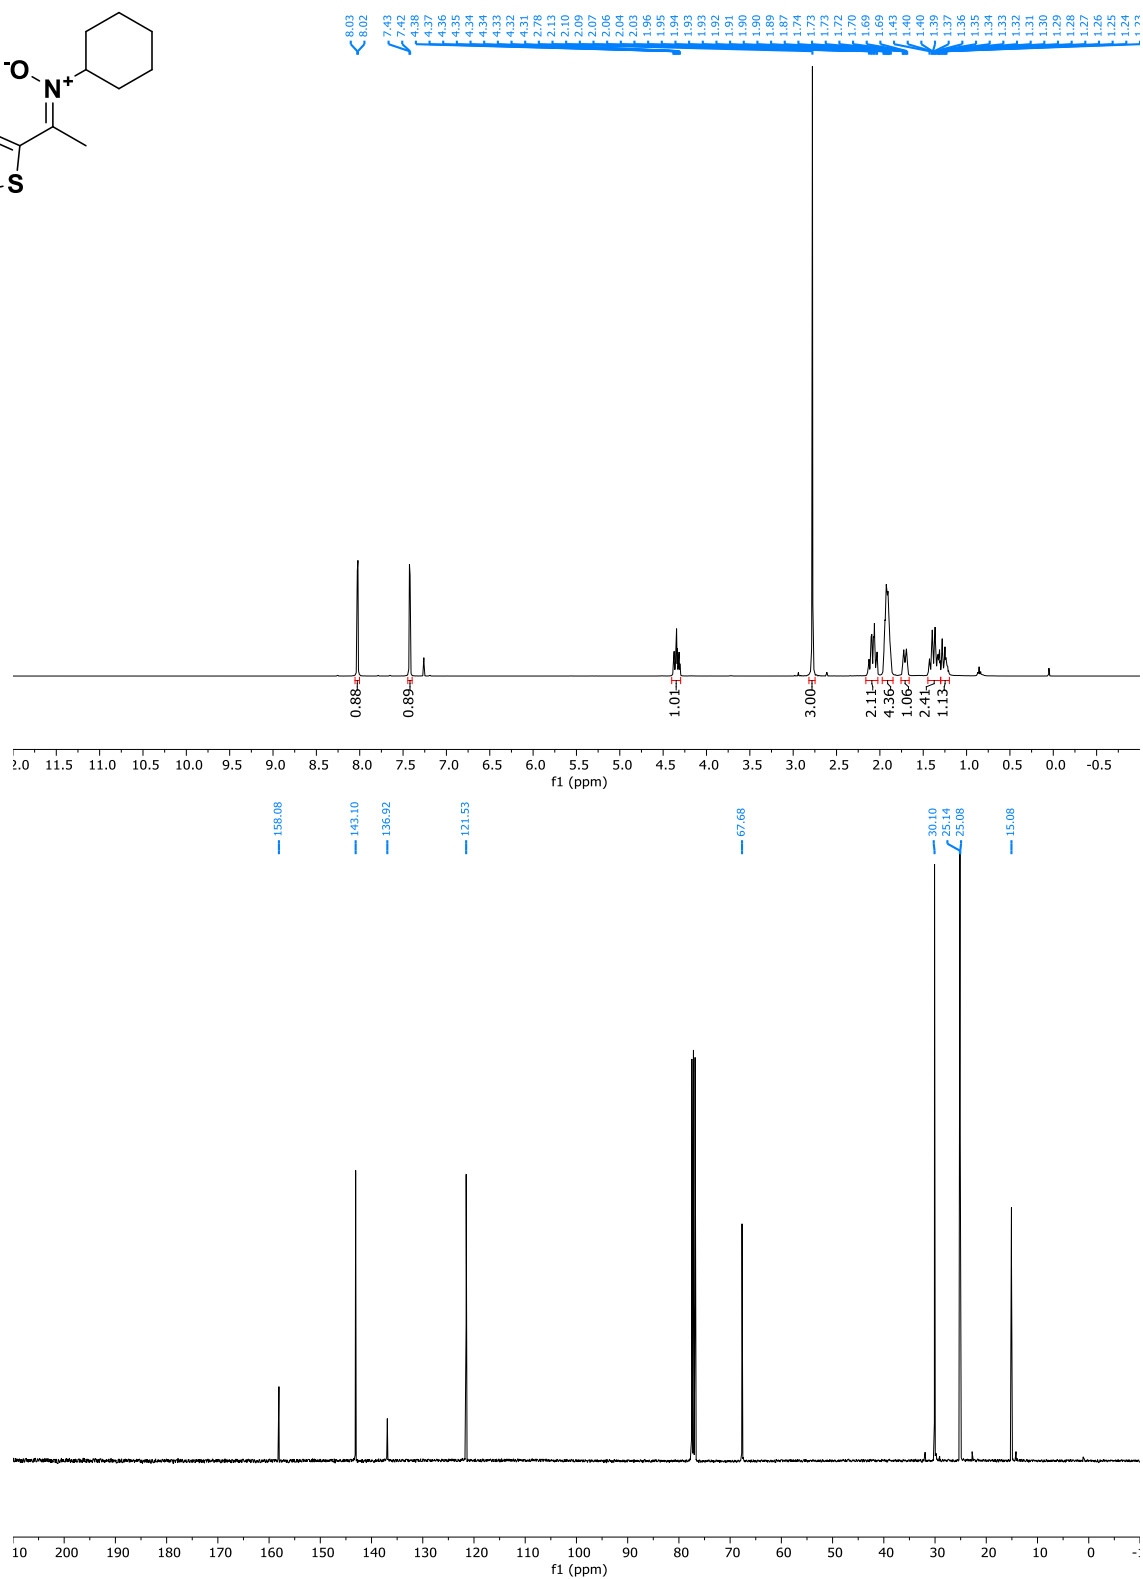





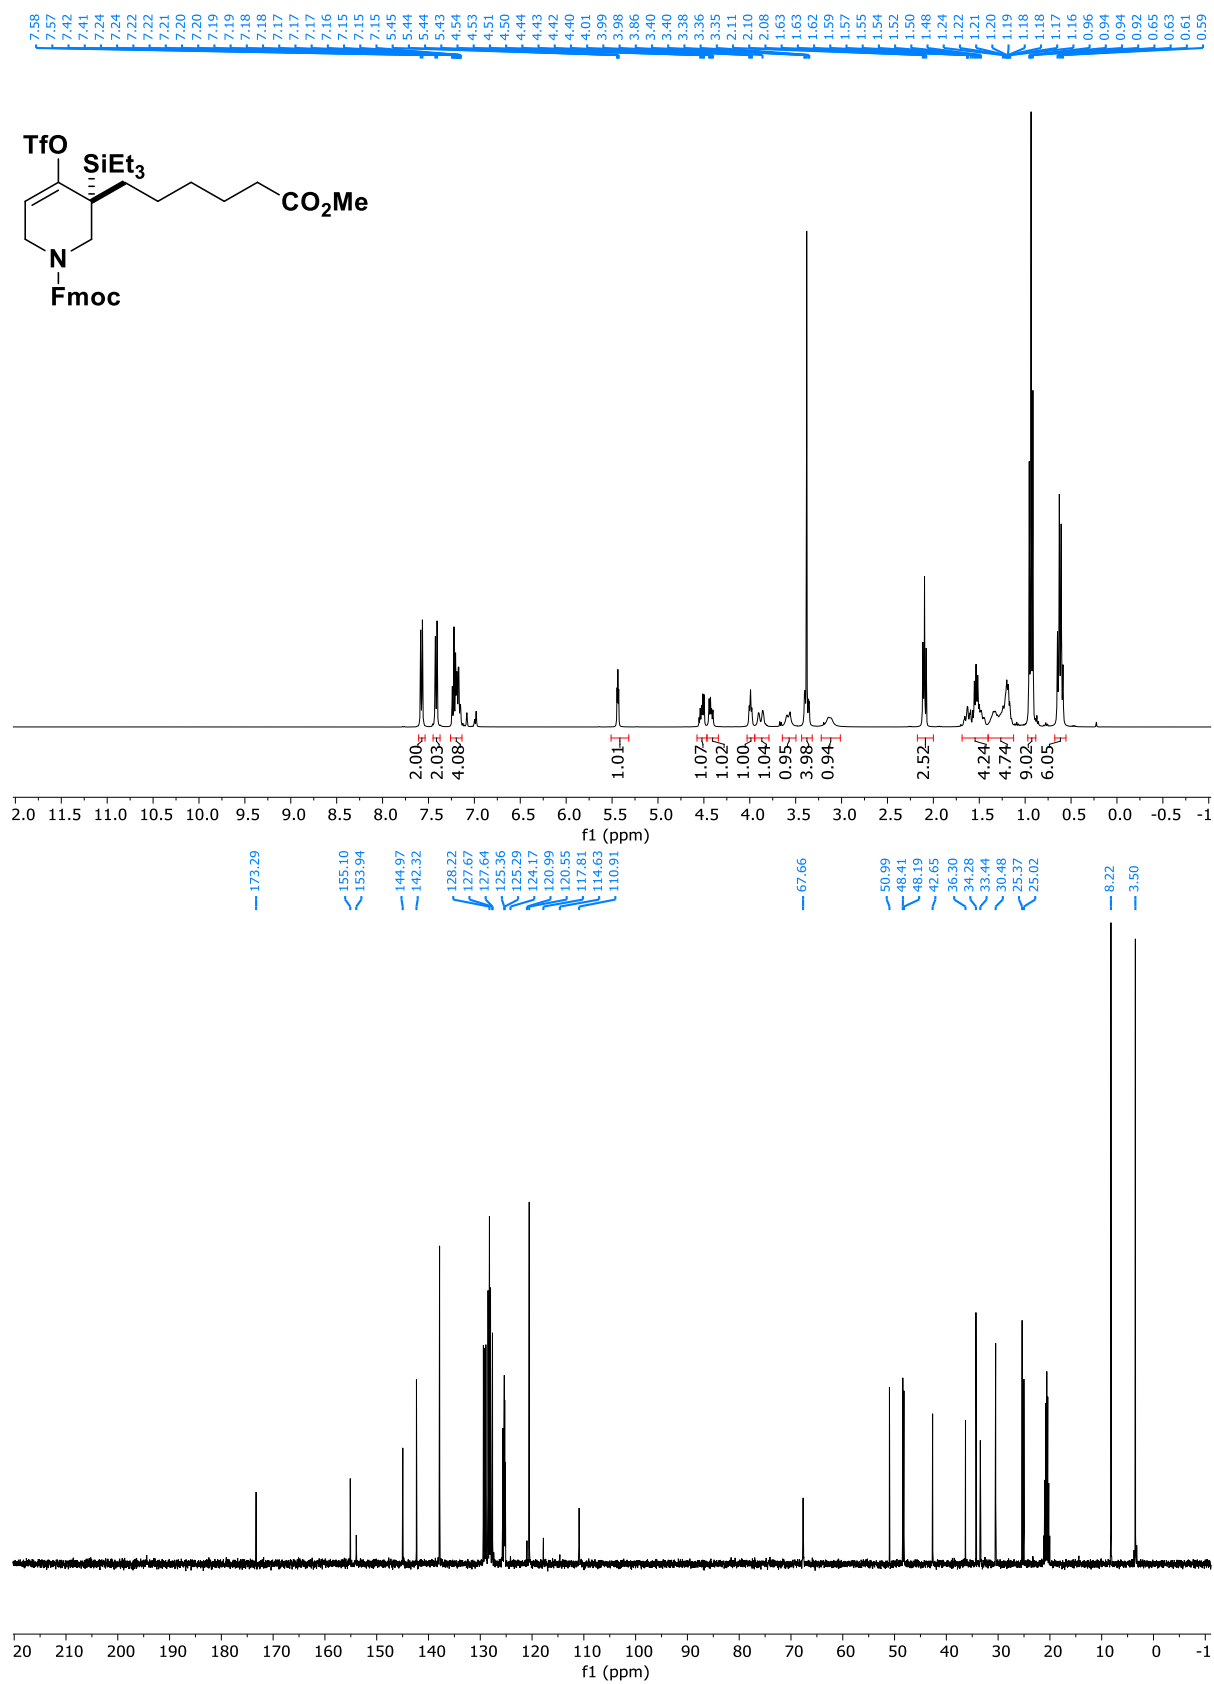

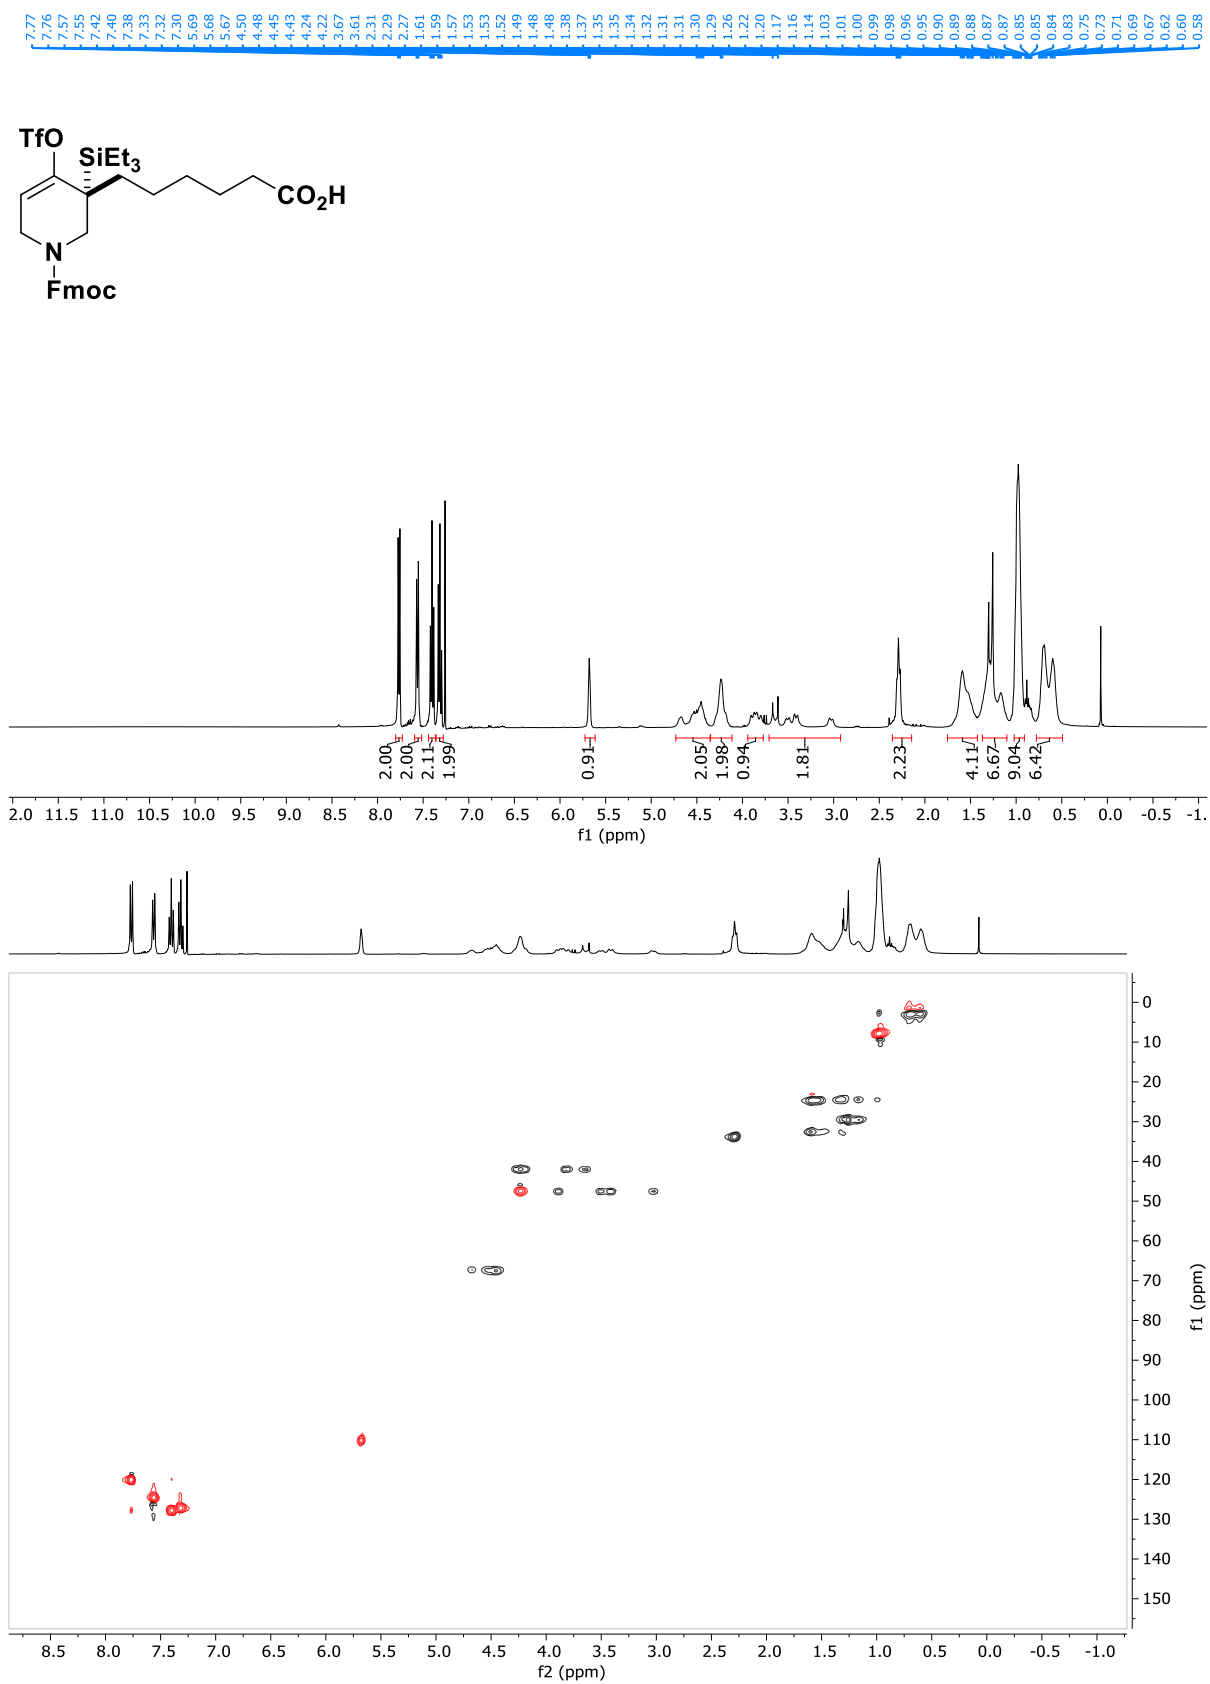

## References

1. Allgäuer, D. S.; Jangra, H.; Asahara, H.; Li, Z.; Chen, Q.; Zipse, H.; Ofial, A. R.; Mayr, H. Quantification and Theoretical Analysis of the Electrophilicities of Michael Acceptors. *J. Am. Chem. Soc.* **2017**, *139*, 13318–13329.
2. Bofo, E. A.; Darko, K.; Afriyie, B. A.; Tia, R.; Adei, E. Trapping of 1,2-cyclohexadiene: A DFT mechanistic study on the reaction of 1,2-cyclohexadiene with olefins and nitrones. *J. Mol. Graph. Model.* **2018**, *81*, 1–13.
3. Hioe, J.; Zipse, H. Radical stability and its role in synthesis and catalysis. *Org. Biomol. Chem.* **2010**, *8*, 3609–3617.
4. Zipse, H. in *Radicals in Synthesis I* (Ed.: A. Gansäuer), Springer-Verlag, Berlin/Heidelberg, **2006**, 163–189.
5. Fulmer, G. R.; Miller, A. J. M.; Sherden, N. H.; Gottlieb, H. E.; Nudelman, A.; Stoltz, B. M.; Bercaw, J. E.; Goldberg, K. I. NMR Chemical Shifts of Trace Impurities: Common Laboratory Solvents, Organics, and Gases in Deuterated Solvents Relevant to the Organometallic Chemist. *Organometallics* **2010**, *29*, 2176–2179.
6. Morales, S.; Guijarro, F. G.; Alonso, I.; García Ruano, J. L.; Cid, M. B. Dual Role of Pyrrolidine and Cooperative Pyrrolidine/Pyrrolidinium Effect in Nitrone Formation. *ACS Catal.* **2016**, *6*, 84–91.
